# Supplementary material for: Microbial transformation of mestanolone byMacrophomina phaseolinaandCunninghamella blakesleeanaand anticancer activities of the transformed products
Source: Royal Society of Chemistry journal article supplement (doi:10.1039/c8ra01309h), 2018-01-01
Supplement: c8ra01309h1.pdf [file c8ra01309h1.pdf]

File: MES  
Sample: RABIA FAROOQ / DR. M. IQBAL  
Instrument: JEOL MS 600H-1

Date Run: 10-07-2015 (Time Run: 12:43:55)

Ionization mode: EI+

Scan: 5  
Base: m/z 247; 58.9%FS TIC: 12090591

R.T.: 37

*Compound #1*

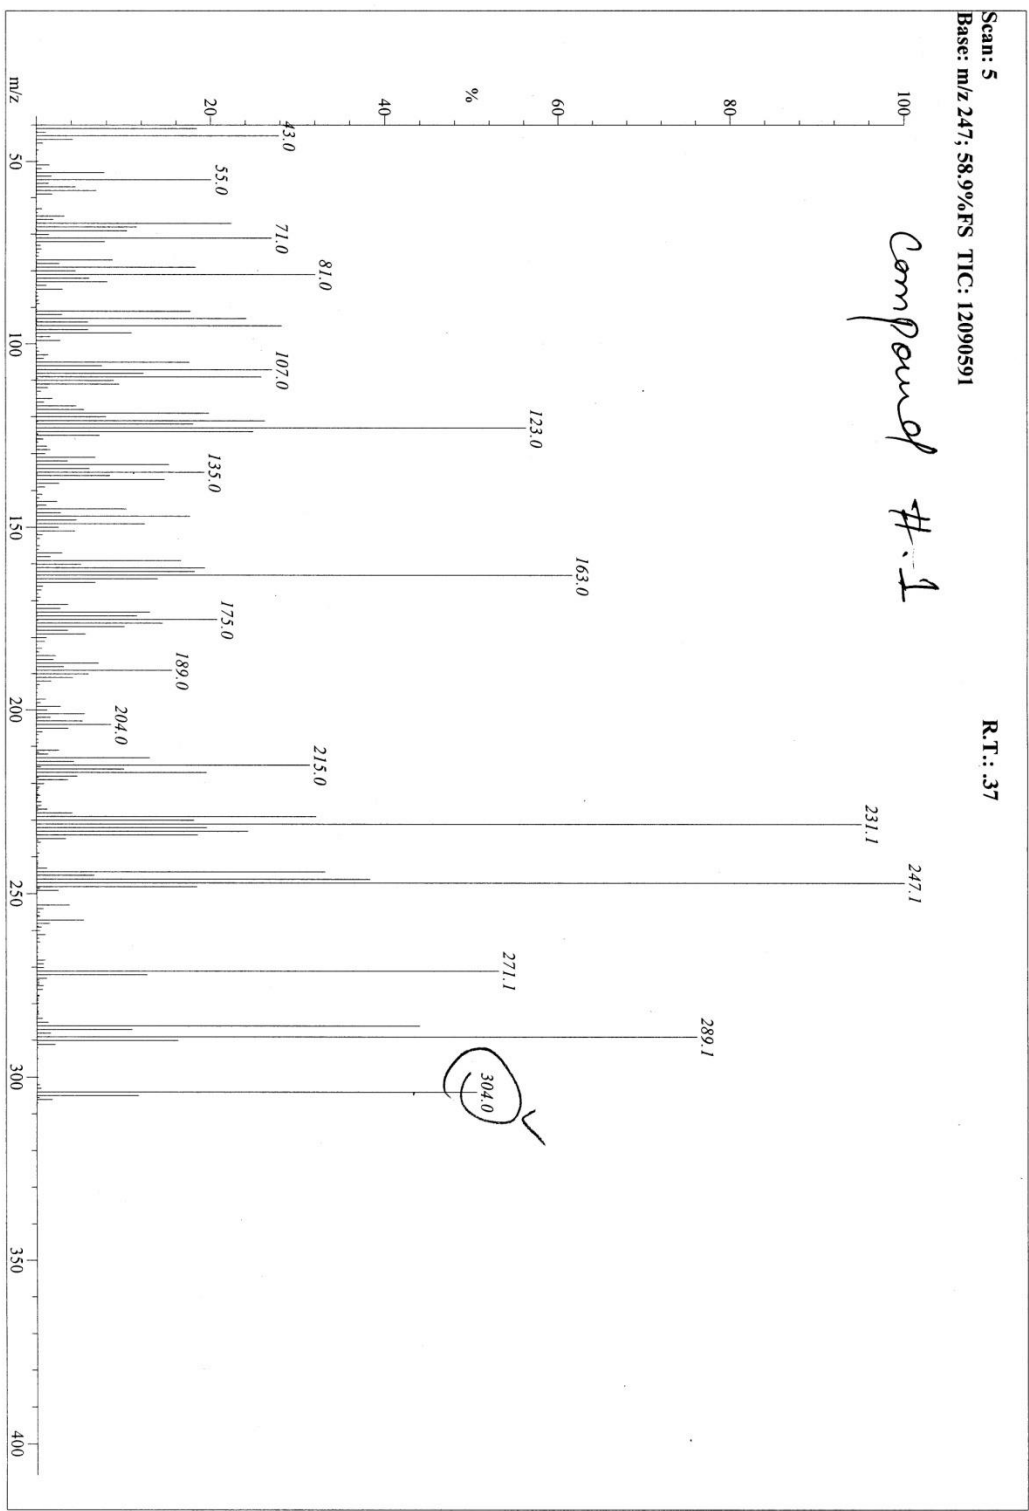

RABIA FAROOQ/DR. IQBAL/MES/CD3OD  
1H

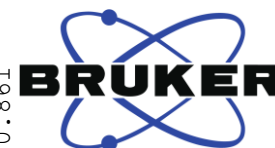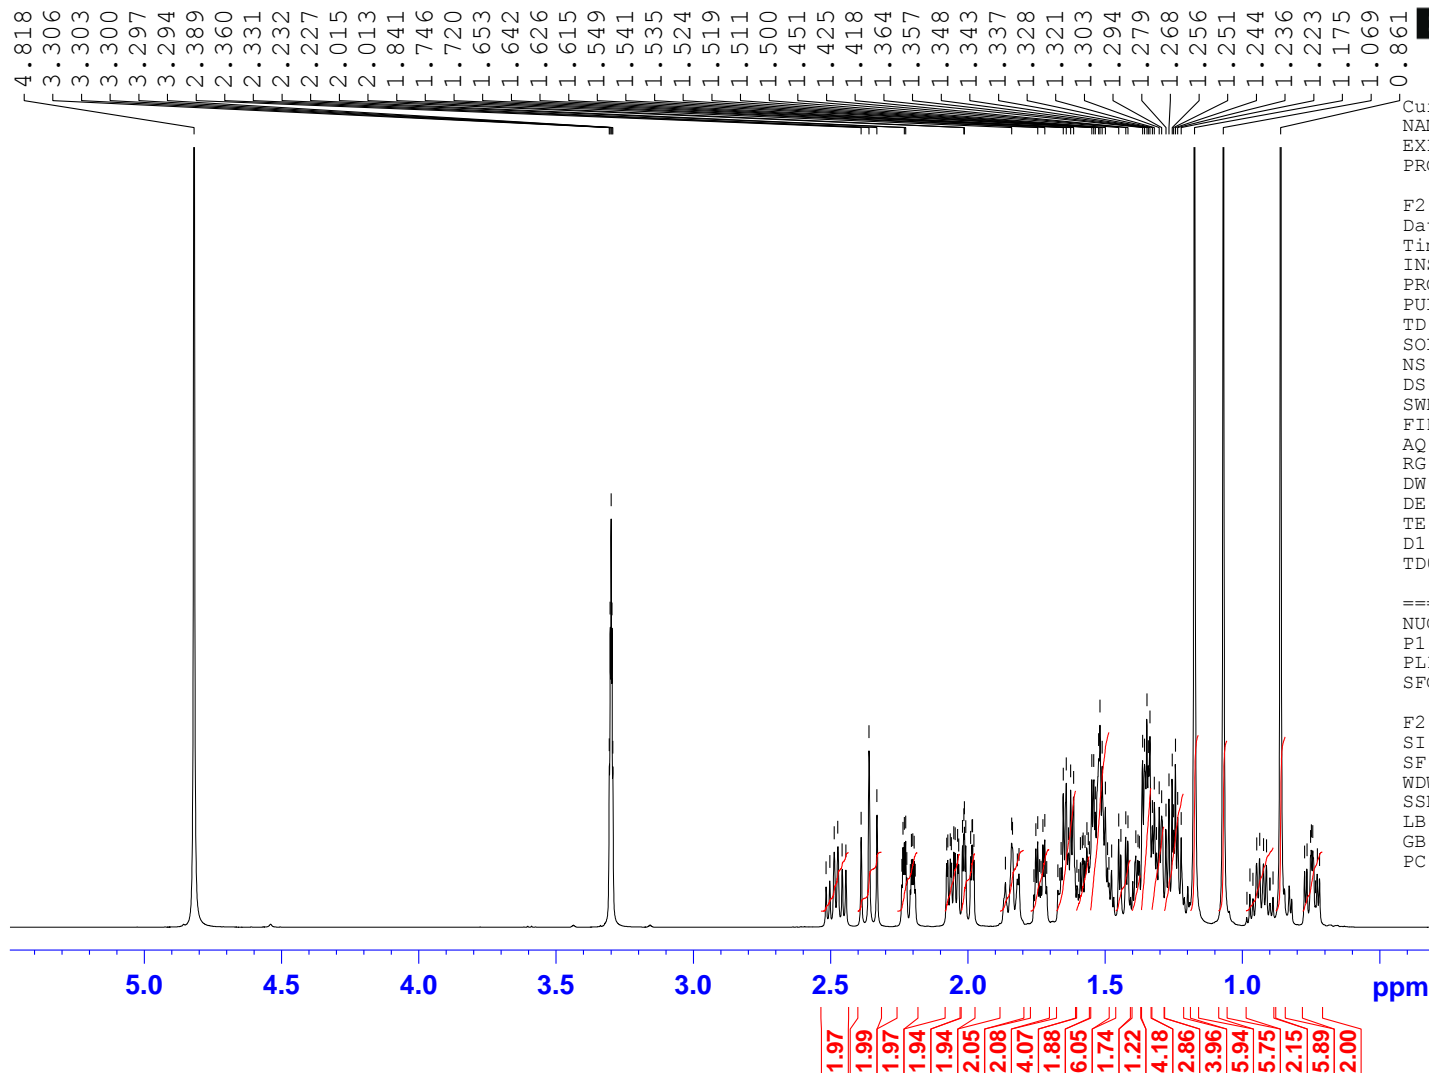

Current Data Parameters  
NAME AUG30-16  
EXPNO 1  
PROCNO 1

F2 - Acquisition Parameters  
Date\_ 20160830  
Time\_ 17.55  
INSTRUM spect  
PROBHD 5 mm BBI 1H/D-  
PULPROG zg30  
TD 32768  
SOLVENT MeOD  
NS 128  
DS 0  
SWH 10330.578 Hz  
FIDRES 0.315264 Hz  
AQ 1.5859712 sec  
RG 90.5  
DW 48.400 usec  
DE 6.50 usec  
TE 300.9 K  
D1 1.5000000 sec  
TD0 1

==== CHANNEL f1 =====  
NUC1 1H  
P1 8.00 usec  
PL1 -1.00 dB  
SFO1 500.1342511 MHz

F2 - Processing parameters  
SI 32768  
SF 500.1300158 MHz  
WDW EM  
SSB 0  
LB 0.30 Hz  
GB 0  
PC 1.00
