# Supplementary material for: Microbial transformation of mestanolone byMacrophomina phaseolinaandCunninghamella blakesleeanaand anticancer activities of the transformed products
Source: Royal Society of Chemistry journal article supplement (doi:10.1039/c8ra01309h), 2018-01-01
Supplement: c8ra01309h2.pdf [file c8ra01309h2.pdf]

Sample # 2

File: MES-1-F31-2  
Sample: RABIA FAROOQ / DR. M. IQBAL  
Instrument: JEOL MS 600H-1

Date Run: 01-13-2016 (Time Run: 09:32:01)

Ionization mode: EI+

Scan: 11

Base: m/z 316; 88%FS TIC: 12879930

R.T.: .88

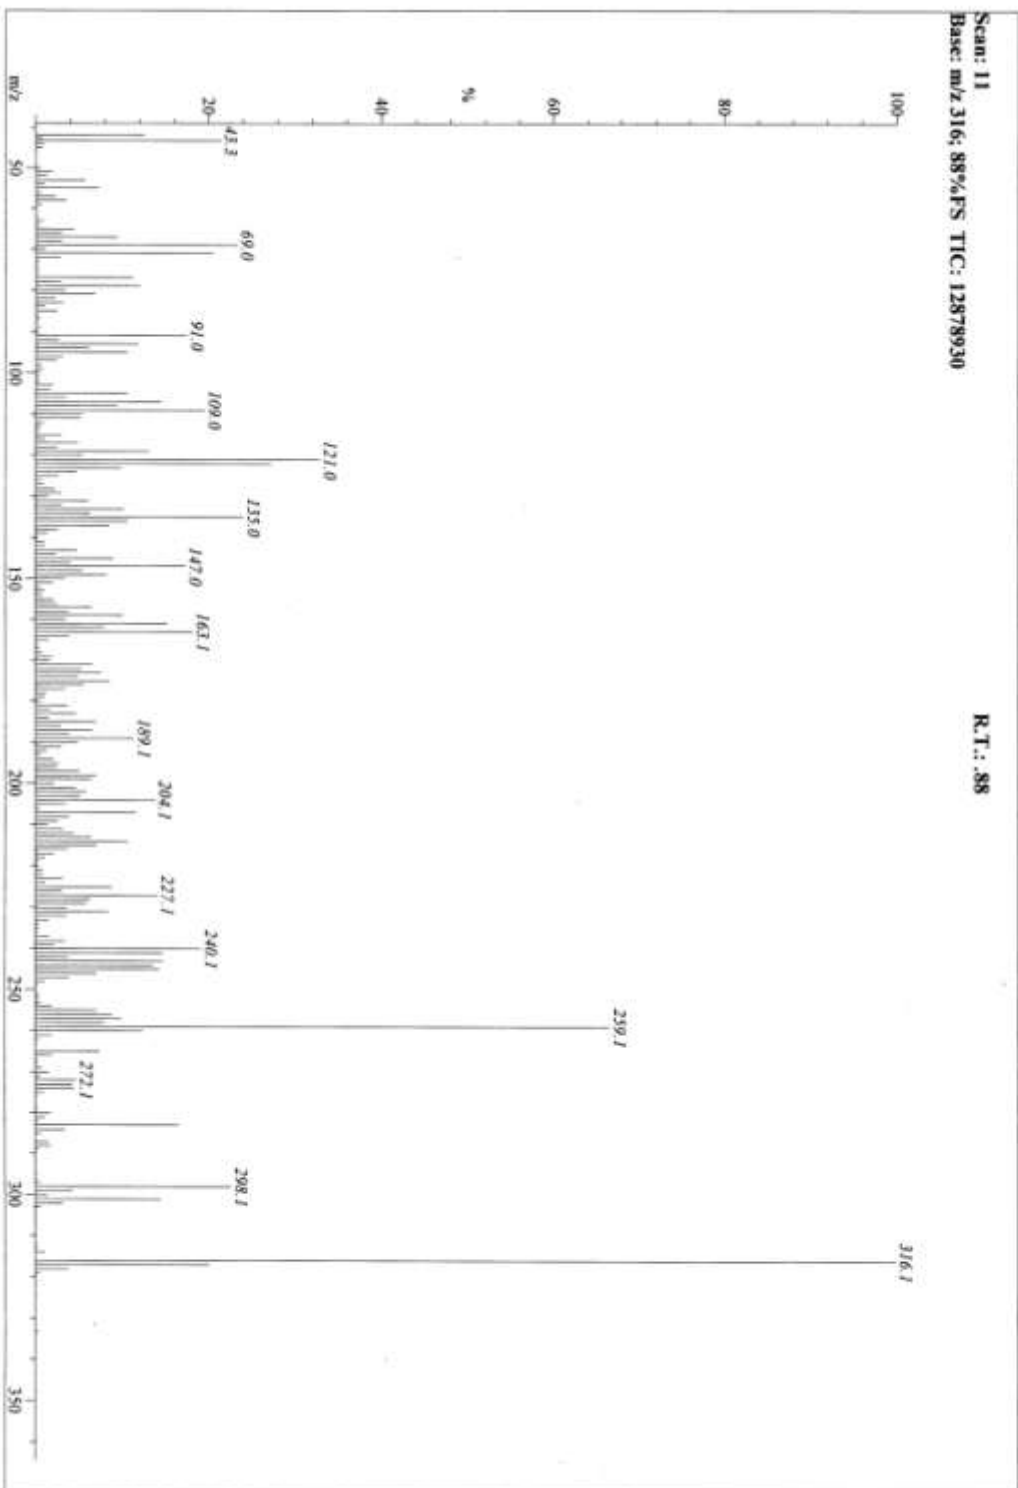

Compound # 2

nicotinic fatty acid

| Mass     | Theoretical Mass | Delta [ppm] | Delta [amu] | RDB | Composition         |
|----------|------------------|-------------|-------------|-----|---------------------|
| 316.2039 | 316.2033         | 1.9         | 0.6         | 7.0 | $C_{20}H_{26}O_3$ ✓ |
| 301.1806 | 301.1798         | 2.6         | 0.8         | 7.5 | $C_{19}H_{25}O_3$   |
| 298.1940 | 298.1927         | 4.3         | 1.3         | 8.0 | $C_{20}H_{26}O_2$   |

substitute 304.

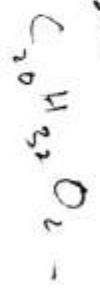

metabolite

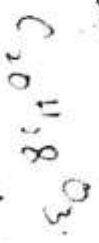

addition of O  
loss of u.H.

Distance

14

Compound # 2

I. C.C.B.S., University of Kar u Analytical Laboratory - Pakistan

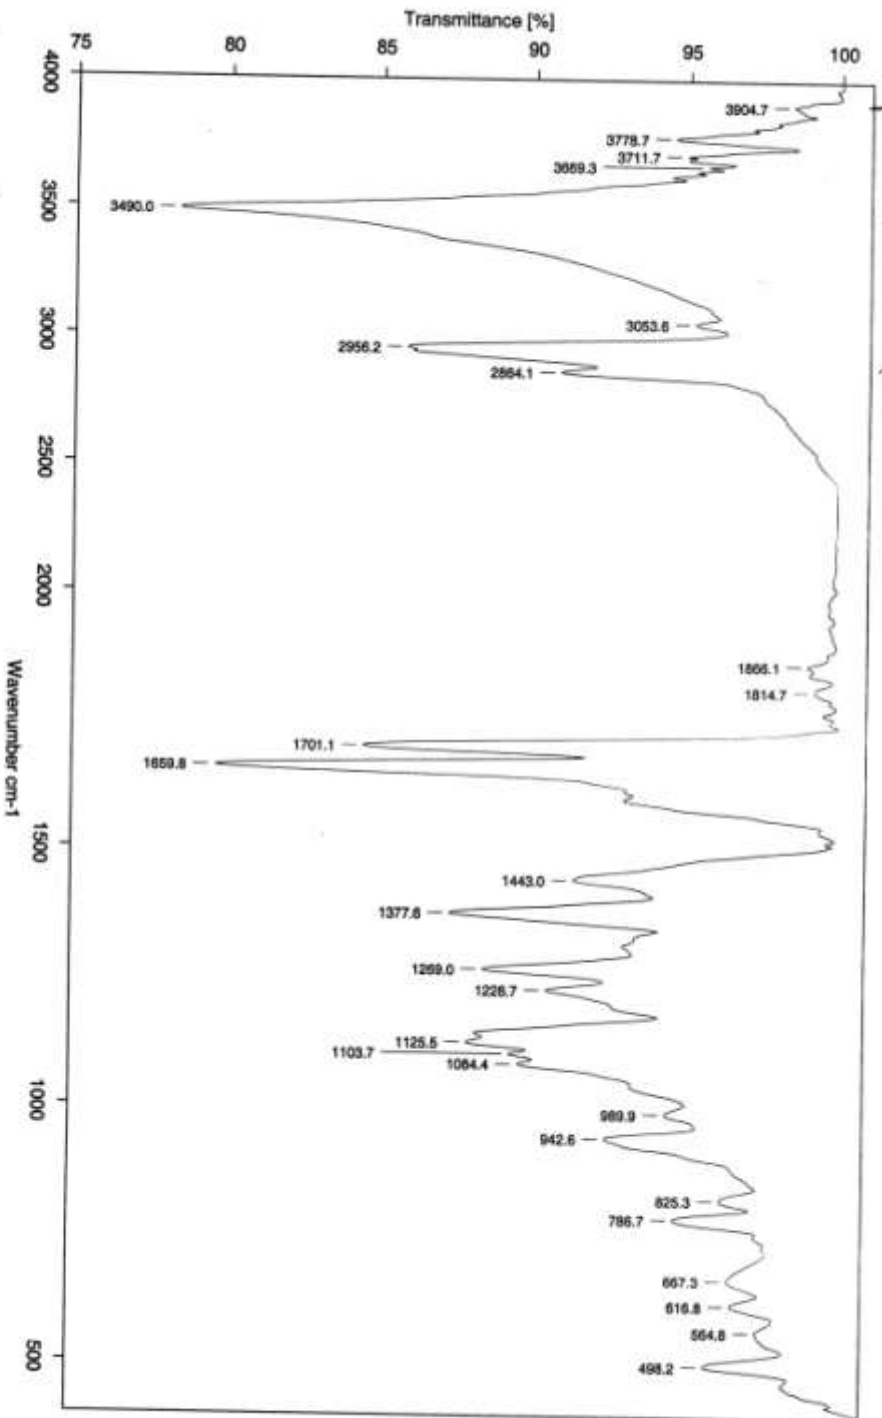

Sample : Mes-J-F31-2/Rabia Farooq/Prof. Dr. M. I. Choudhary  
Measured : 10/11/2016 on VECTOR22  
Resolution : 4 cm-1 ( 10 scans )  
Spectrum : Mes-J-F31-2.0 (In D:\IRSTUDENT)  
Technic : SOLID  
Analyst : M.Q.sif/ZQ

RABIA/DR.IQBAL/MES/J/F31-2/CD3OD

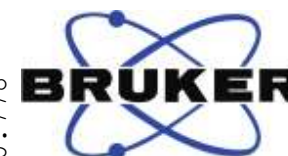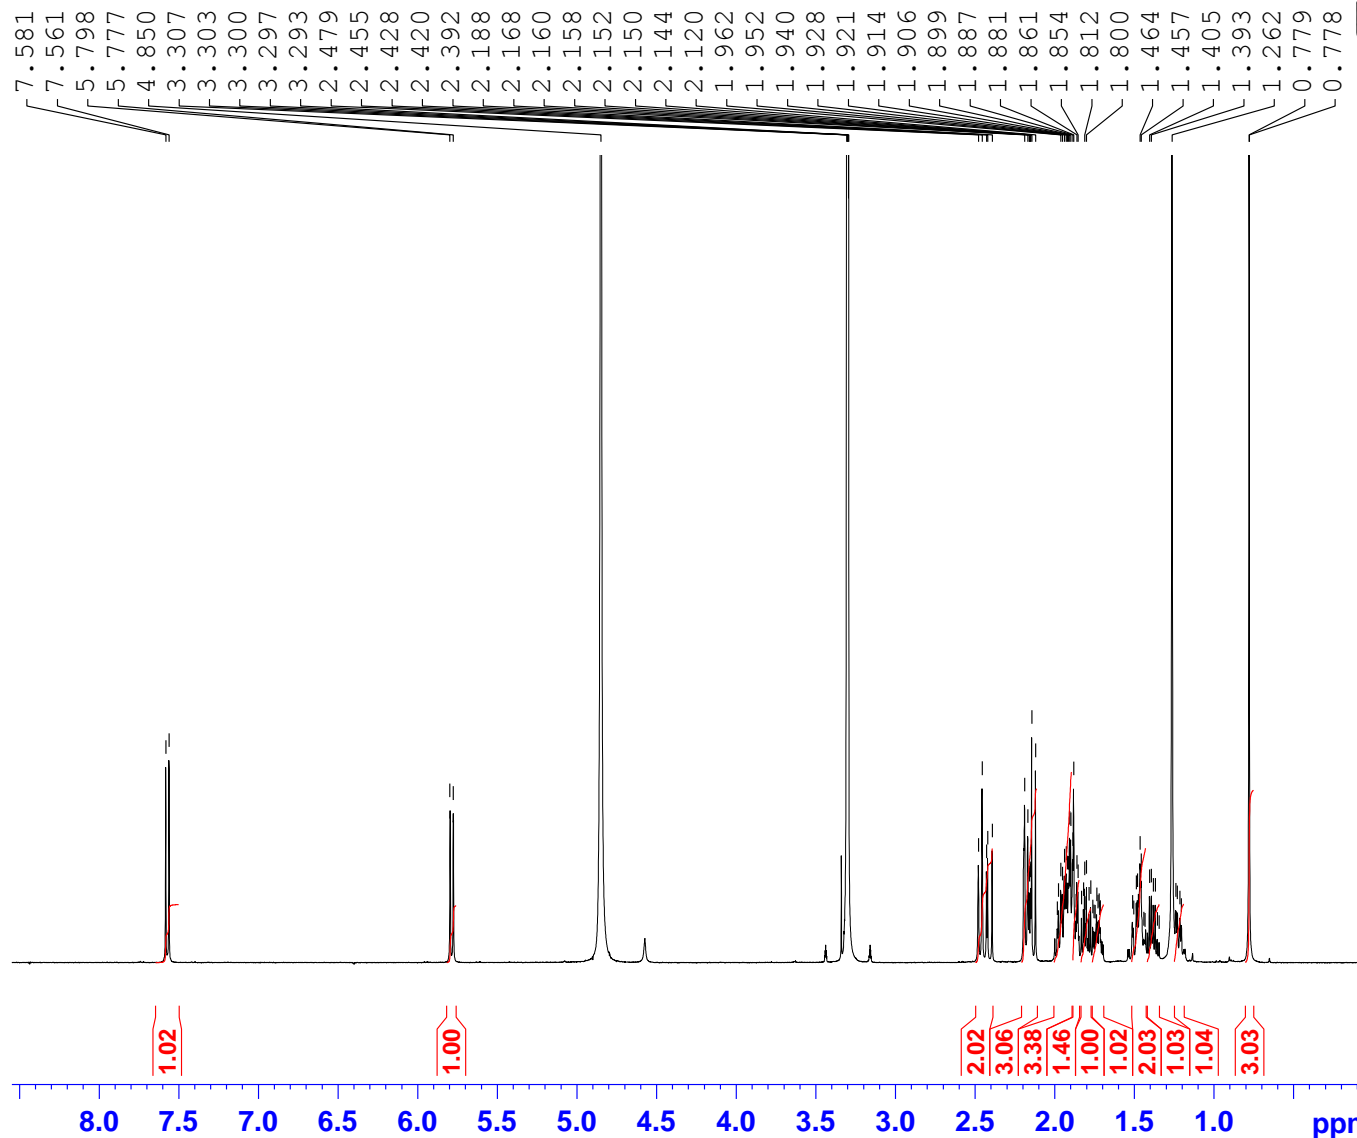

Current Data Parameters  
NAME compd 2  
EXPNO 10  
PROCNO 1

F2 - Acquisition Parameters  
Date\_ 20160107  
Time\_ 19.35  
INSTRUM spect  
PROBHD 5 mm PABBI 1H/  
PULPROG zg30  
TD 65536  
SOLVENT MeOD  
NS 128  
DS 0  
SWH 12019.230 Hz  
FIDRES 0.183399 Hz  
AQ 2.7262976 sec  
RG 256  
DW 41.600 usec  
DE 6.50 usec  
TE 298.0 K  
D1 2.00000000 sec  
TD0 1

==== CHANNEL f1 =====  
NUC1 1H  
P1 8.03 usec  
PL1 3.00 dB  
SFO1 500.2350023 MHz

F2 - Processing parameters  
SI 32768  
SF 500.2300120 MHz  
WDW EM  
SSB 0  
LB 0.30 Hz  
GB 0  
PC 1.00

RABIA FAROOQ/DR, IQBAL/Mes/J/F31-2/  
ICCBS, U.O.K/DEPT-90

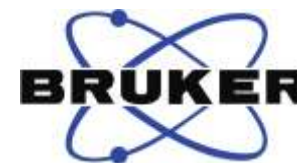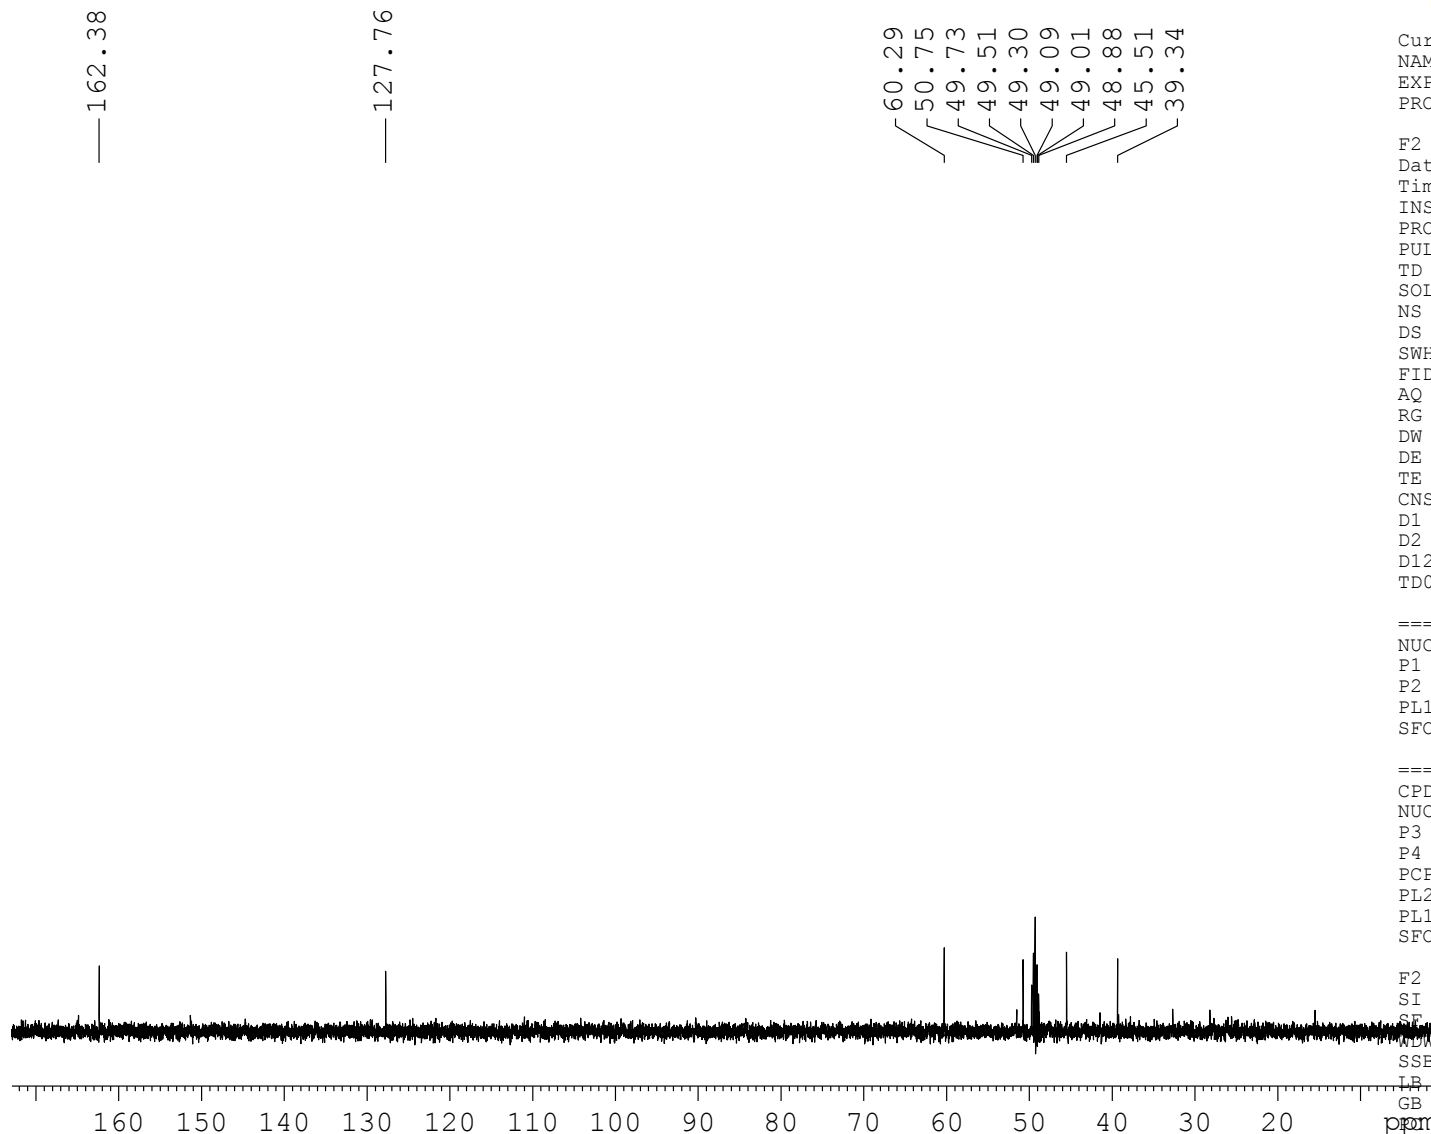

Current Data Parameters  
NAME compd 2  
EXPNO 5  
PROCNO 1

F2 - Acquisition Parameters  
Date\_ 20160607  
Time\_ 11.36  
INSTRUM spect  
PROBHD 5 mm DUL 13C-1  
PULPROG dept90  
TD 32768  
SOLVENT MeOD  
NS 1271  
DS 2  
SWH 19157.088 Hz  
FIDRES 0.584628 Hz  
AQ 0.8552448 sec  
RG 32768  
DW 26.100 usec  
DE 6.50 usec  
TE 300.0 K  
CNST2 145.000000  
D1 1.50000000 sec  
D2 0.00344828 sec  
D12 0.00002000 sec  
TD0 3

===== CHANNEL f1 =====  
NUC1 13C  
P1 8.10 usec  
P2 16.20 usec  
PL1 7.00 dB  
SFO1 100.6220254 MHz

===== CHANNEL f2 =====  
CPDPRG[2] waltz16  
NUC2 1H  
P3 9.80 usec  
P4 19.60 usec  
PCPD2 80.00 usec  
PL2 0 dB  
PL12 20.00 dB  
SFO2 400.1320007 MHz

F2 - Processing parameters  
SI 32768  
SF 100.6126252 MHz  
WDW EM  
SSB 0  
LB 1.00 Hz  
GB 0  
PC 1.40

RABIA FAROOQ/DR, IQBAL/Mes/J/F31-2/  
ICCBS, U.O.K/BB/

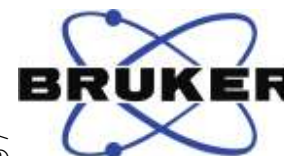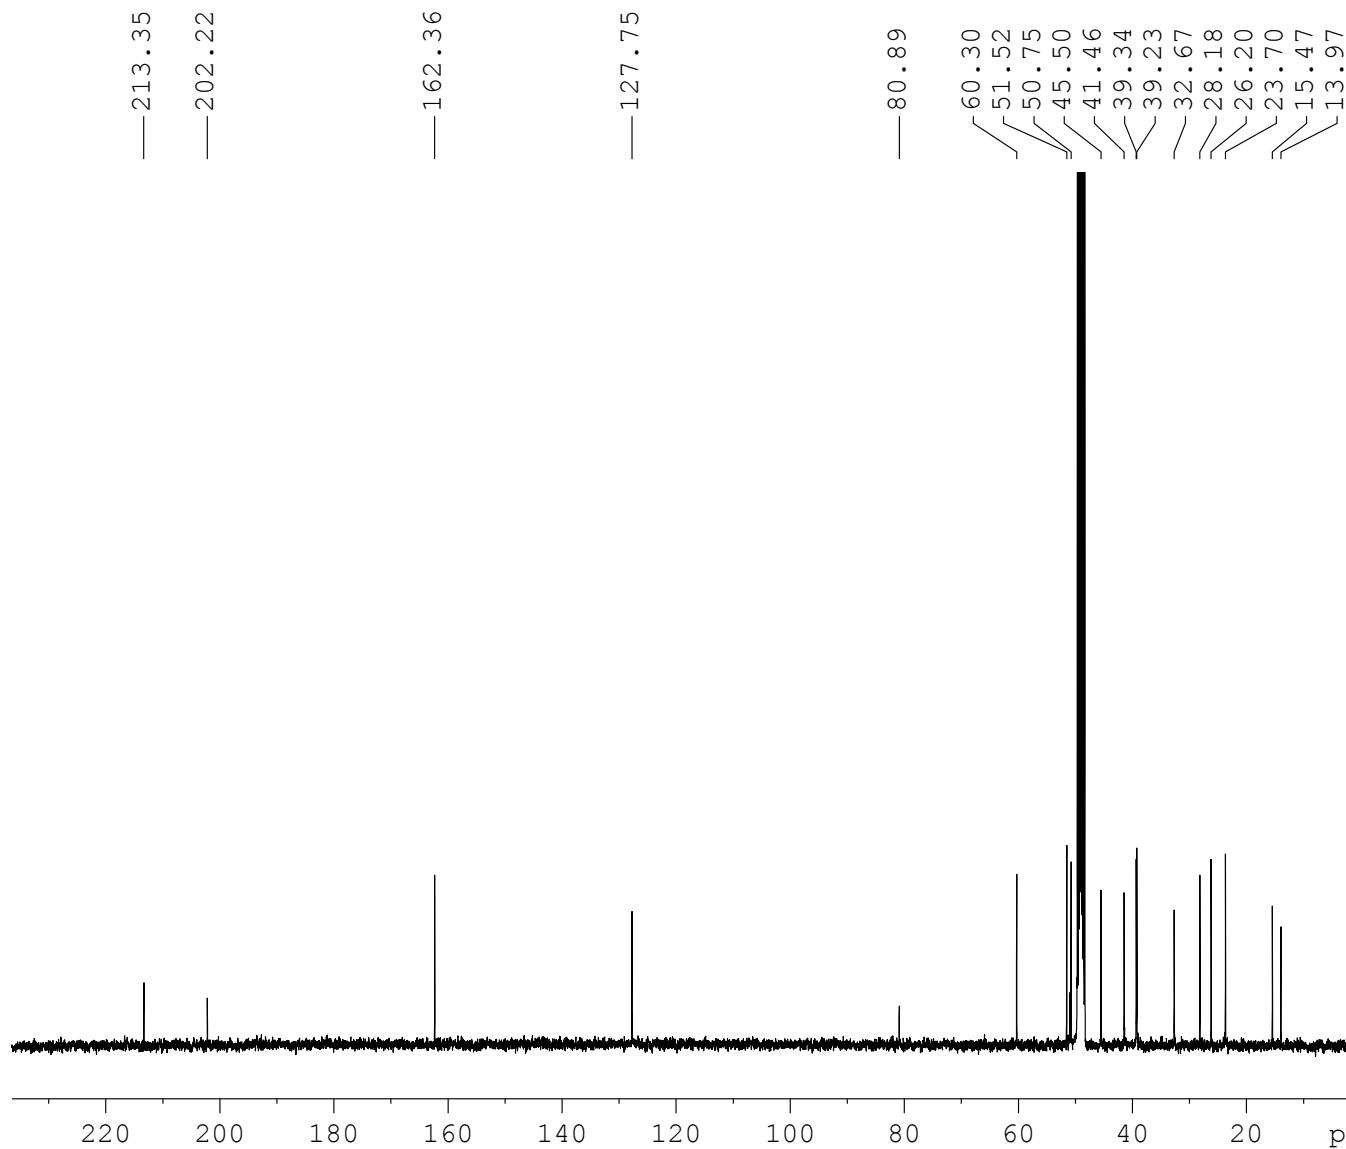

Current Data Parameters  
NAME compd 2  
EXPNO 3  
PROCNO 1

F2 - Acquisition Parameters  
Date\_ 20160606  
Time 15.52  
INSTRUM spect  
PROBHD 5 mm DUL 13C-1  
PULPROG zgpg  
TD 32768  
SOLVENT MeOD  
NS 20480  
DS 2  
SWH 24154.590 Hz  
FIDRES 0.737140 Hz  
AQ 0.6782976 sec  
RG 32768  
DW 20.700 usec  
DE 6.50 usec  
TE 300.0 K  
D1 2.00000000 sec  
D11 0.03000000 sec  
TD0 20

==== CHANNEL f1 =====  
NUC1 13C  
P1 8.10 usec  
PL1 7.00 dB  
SFO1 100.6243395 MHz

==== CHANNEL f2 =====  
CPDPRG[2] waltz16  
NUC2 1H  
PCPD2 80.00 usec  
PL2 0 dB  
PL12 20.00 dB  
PL13 22.00 dB  
SFO2 400.1324008 MHz

F2 - Processing parameters  
SI 16384  
SF 100.6126252 MHz  
WDW EM  
SSB 0  
LB 1.50 Hz  
GB 0  
PC 1.00

RABIA FAROOQ/DR, IQBAL/Mes/J/F31-2/  
ICCBS, U.O.K/DEPT 135

— 162.38

— 127.76

60.29  
51.52  
50.75  
49.73  
49.51  
49.30  
49.09  
49.01  
48.87  
45.51  
41.47  
39.34  
39.22  
32.68  
28.19  
26.21  
23.70  
15.48  
13.98

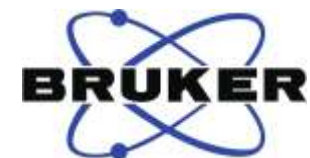

Current Data Parameters  
NAME compd 2  
EXPNO 4  
PROCNO 1

F2 - Acquisition Parameters  
Date 20160607  
Time 7.22  
INSTRUM spect  
PROBHD 5 mm DUL 13C-1  
PULPROG dept135  
TD 32768  
SOLVENT MeOD  
NS 6414  
DS 2  
SWH 19157.088 Hz  
FIDRES 0.584628 Hz  
AQ 0.8552448 sec  
RG 32768  
DW 26.100 usec  
DE 6.50 usec  
TE 300.0 K  
CNST2 145.0000000  
D1 1.50000000 sec  
D2 0.00344828 sec  
D12 0.00002000 sec  
TD0 9

==== CHANNEL f1 =====  
NUC1 13C  
P1 8.10 usec  
P2 16.20 usec  
PL1 7.00 dB  
SFO1 100.6220254 MHz

==== CHANNEL f2 =====  
CPDPRG[2] waltz16  
NUC2 1H  
P3 9.80 usec  
P4 19.60 usec  
PCPD2 80.00 usec  
PL2 0 dB  
PL12 20.00 dB  
SFO2 400.1320007 MHz

F2 - Processing parameters  
SI 32768  
SF 100.6126252 MHz  
WDW EM  
SSB 0  
LB 1.50 Hz  
GB 0  
PC 1.40

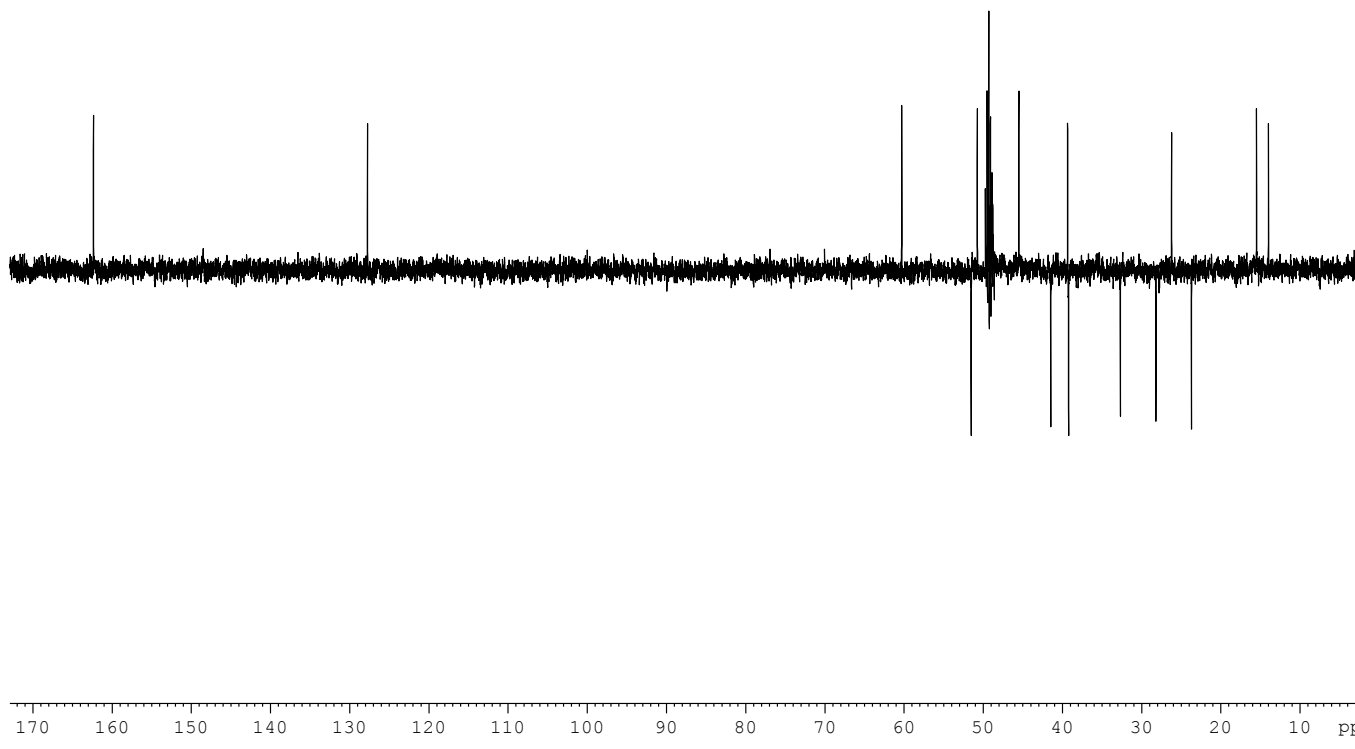

RABIA/DR.IQBAL/MES/J/F31-2/CD3OD

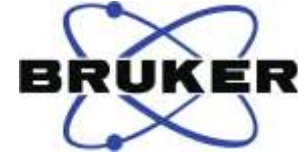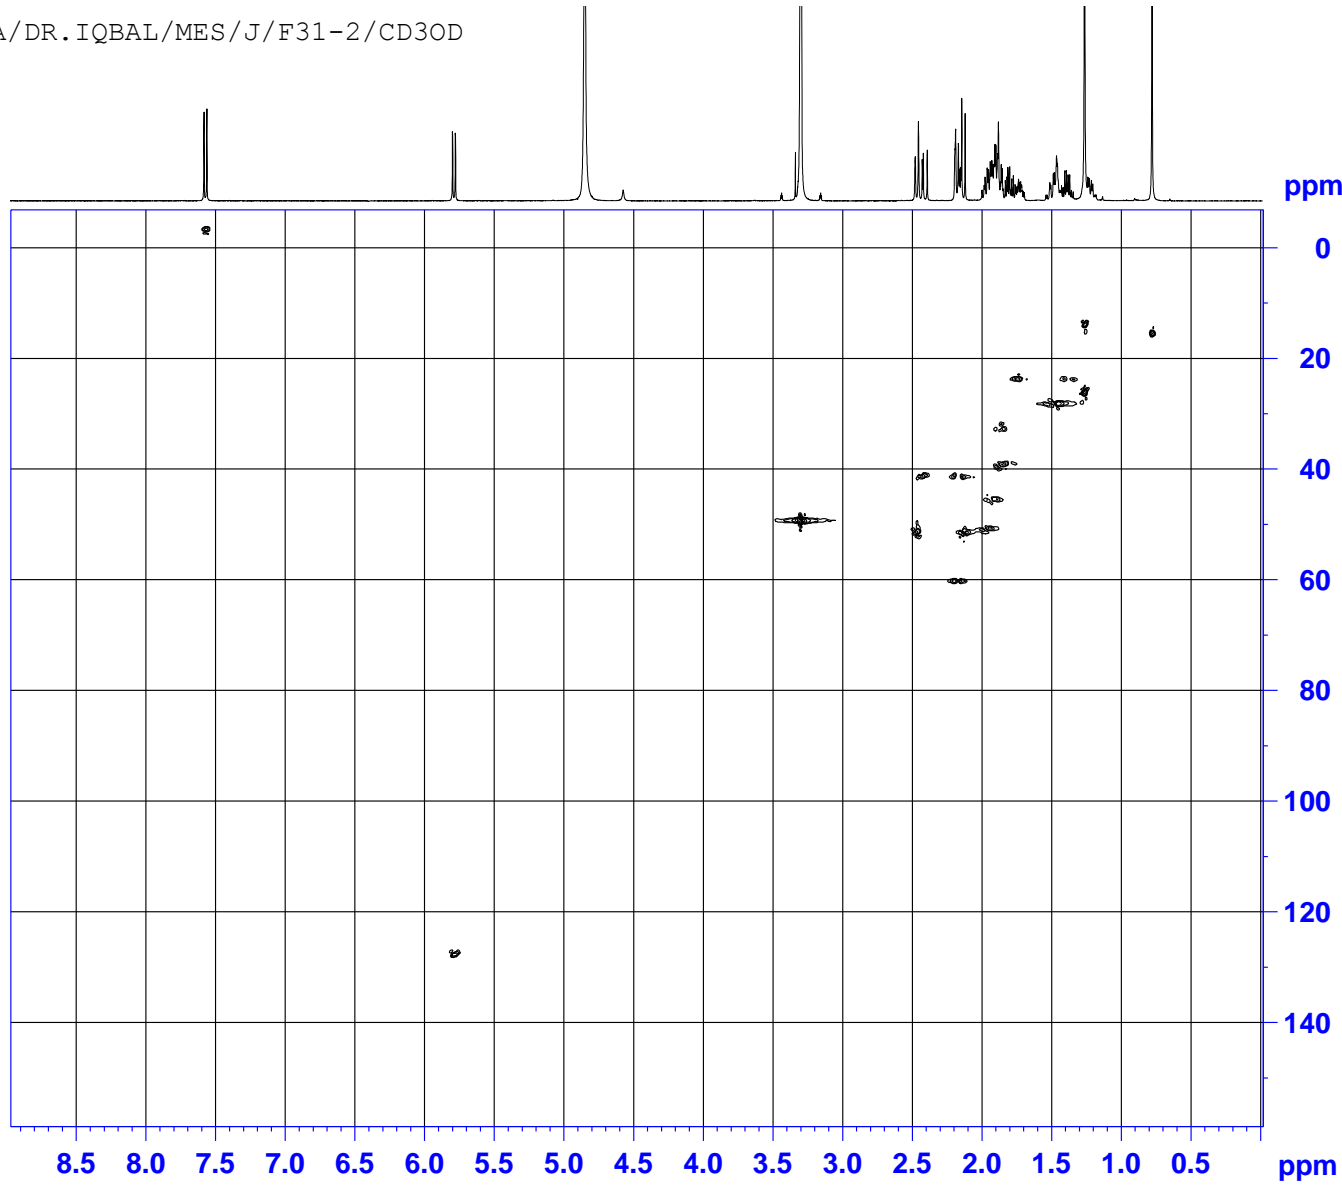

```
Current Data Parameters
NAME      compd 2
EXPNO    13
PROCNO   1

F2 - Acquisition Parameters
Date_    20160108
Time     0.05
INSTRUM  spect
PROBHD   5 mm PABBI 1H/
PULPROG  hsqcedetgp
TD       1024
SOLVENT  MeOD
NS       32
DS       16
SWH      4496.403 Hz
FIDRES   4.391018 Hz
AQ       0.1138688 sec
RG       18390.4
DW       111.200 usec
DE       6.50 usec
TE       295.9 K
CNST2    145.0000000
D0       0.00000300 sec
D1       1.50000000 sec
D4       0.00172414 sec
D11      0.03000000 sec
D13      0.00000400 sec
D16      0.00020000 sec
D21      0.00345000 sec
IN0      0.00002400 sec
ZGOFPTS

===== CHANNEL f1 =====
NUC1     1H
P1       8.03 usec
P2       16.06 usec
P28      1000.00 usec
PL1      3.00 dB
SFO1     500.2322510 MHz

===== CHANNEL f2 =====
CPDPRG2  garp
NUC2     13C
P3       13.35 usec
P4       26.70 usec
PCPD2    70.00 usec
PL2      -3.00 dB
PL12     10.00 dB
SFO2     125.7923151 MHz

===== GRADIENT CHANNEL =====
GPNAM[1] SINE.100
GPNAM[2] SINE.100
GPZ1     80.00 %
GPZ2     20.10 %
P16      1000.00 usec

F1 - Acquisition parameters
TD       256
SFO1     125.7923 MHz
FIDRES   162.782379 Hz
SW       165.639 ppm
FnMODE   Echo-Antiecho

F2 - Processing parameters
SI       1024
SF       500.2300120 MHz
WDW      QSINE
SSB      2
LB       0 Hz
GB       0
PC       0.80

F1 - Processing parameters
SI       1024
MC2      echo-antiecho
SF       125.7827558 MHz
WDW      QSINE
SSB      2
LB       0 Hz
GB       0
```



RABIA/DR.IQBAL/MES/J/F31-2/CD3OD

HMBC

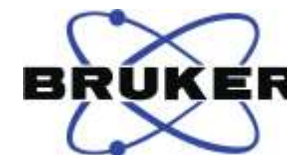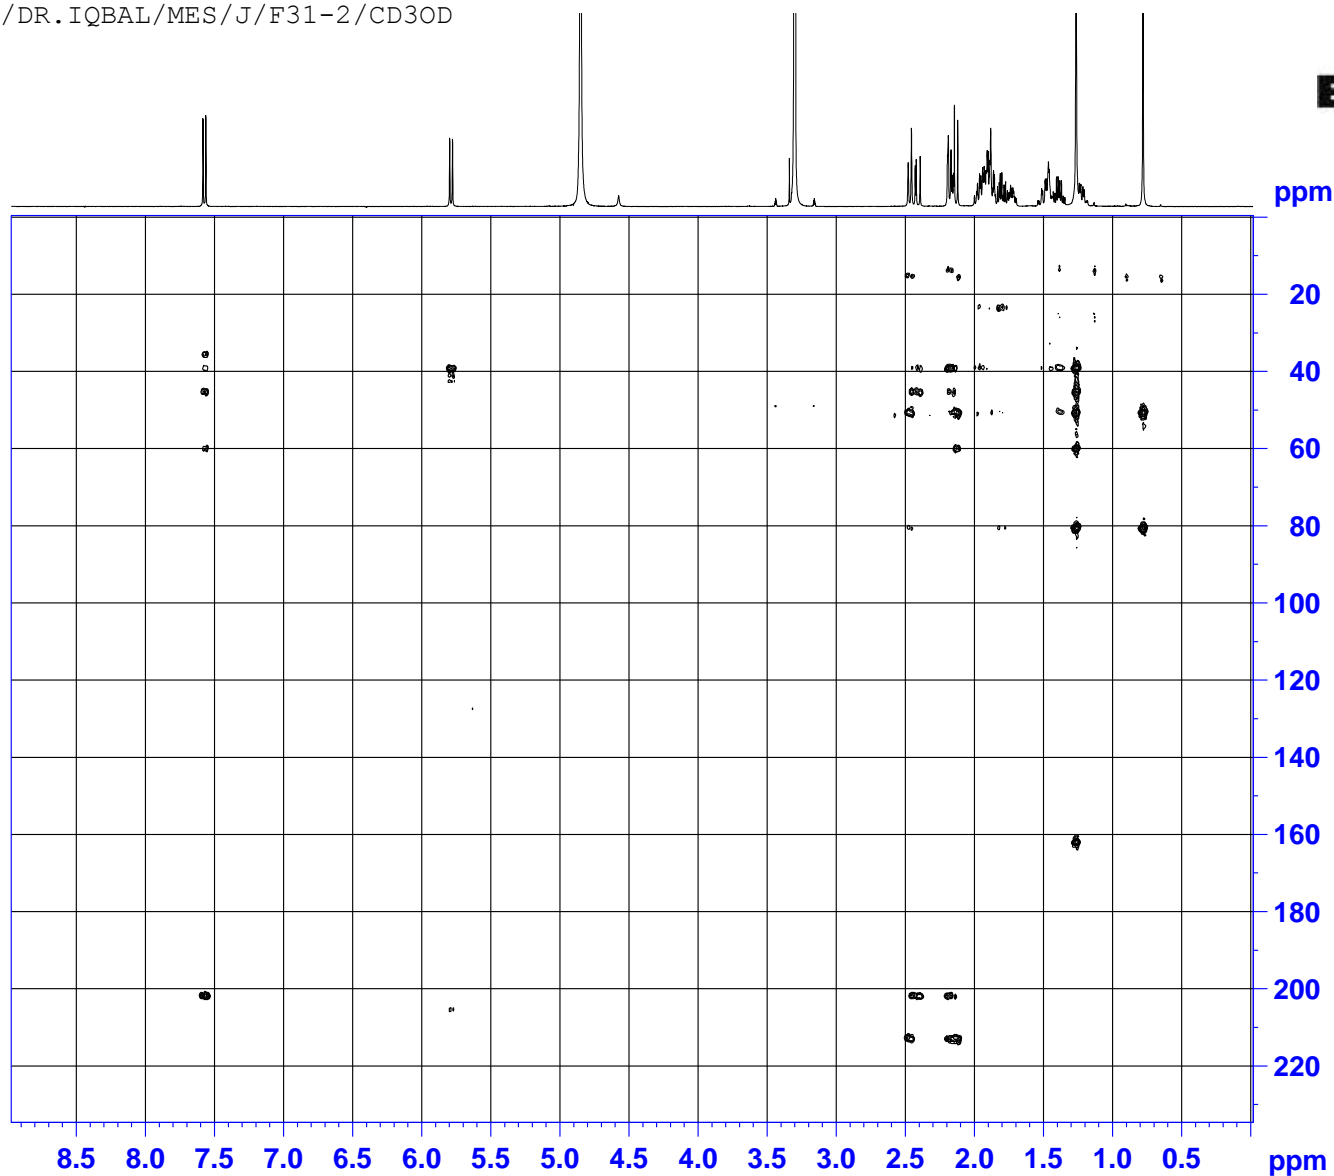

Current Data Parameters  
NAME comp1 2  
EXPNO 14  
PROCNO 1

F2 - Acquisition Parameters  
Date\_ 20160108  
Time 3.51  
INSTRUM spect  
PROBHD 5 mm PABBI 1H/  
PULPROG hmbcgp1pndqf  
TD 2048  
SOLVENT MeOD  
NS 64  
DS 16  
SWH 4496.403 Hz  
FIDRES 2.195509 Hz  
AQ 0.2277376 sec  
RG 20642.5  
DW 111.200 usec  
DE 6.50 usec  
TE 295.4 K  
CNST2 145.000000  
CNST13 10.000000  
D0 0.0000000 sec  
D1 2.0000000 sec  
D2 0.00344828 sec  
D6 0.05000000 sec  
D16 0.00020000 sec  
IN0 0.00001690 sec

===== CHANNEL f1 =====  
NUC1 1H  
P1 8.03 usec  
P2 16.06 usec  
PL1 3.00 dB  
SFO1 500.2322510 MHz

===== CHANNEL f2 =====  
NUC2 13C  
P3 13.35 usec  
PL2 -3.00 dB  
SFO2 125.7974871 MHz

===== GRADIENT CHANNEL =====  
GPNAM[1] SINE.100  
GPNAM[2] SINE.100  
GPNAM[3] SINE.100  
GPZ1 50.00 %  
GPZ2 30.00 %  
GPZ3 40.10 %  
P16 1000.00 usec

F1 - Acquisition parameters  
TD 256  
SFO1 125.7975 MHz  
FIDRES 230.956329 Hz  
SW 235.000 ppm  
FhMODE QF

F2 - Processing parameters  
SI 1024  
SF 500.2300120 MHz  
WDW SINE  
SSB 0  
LB 0 Hz  
GB 0  
FC 1.00

F1 - Processing parameters  
SI 512  
MC2 QF  
SF 125.7827558 MHz  
WDW SINE  
SSB 0  
LB 0 Hz  
GB 0

RABIA/DR. IQBAL/MES/J/F31-2/CD3OD  
ICCBS/U.O.K  
COSY

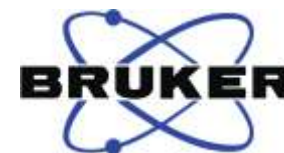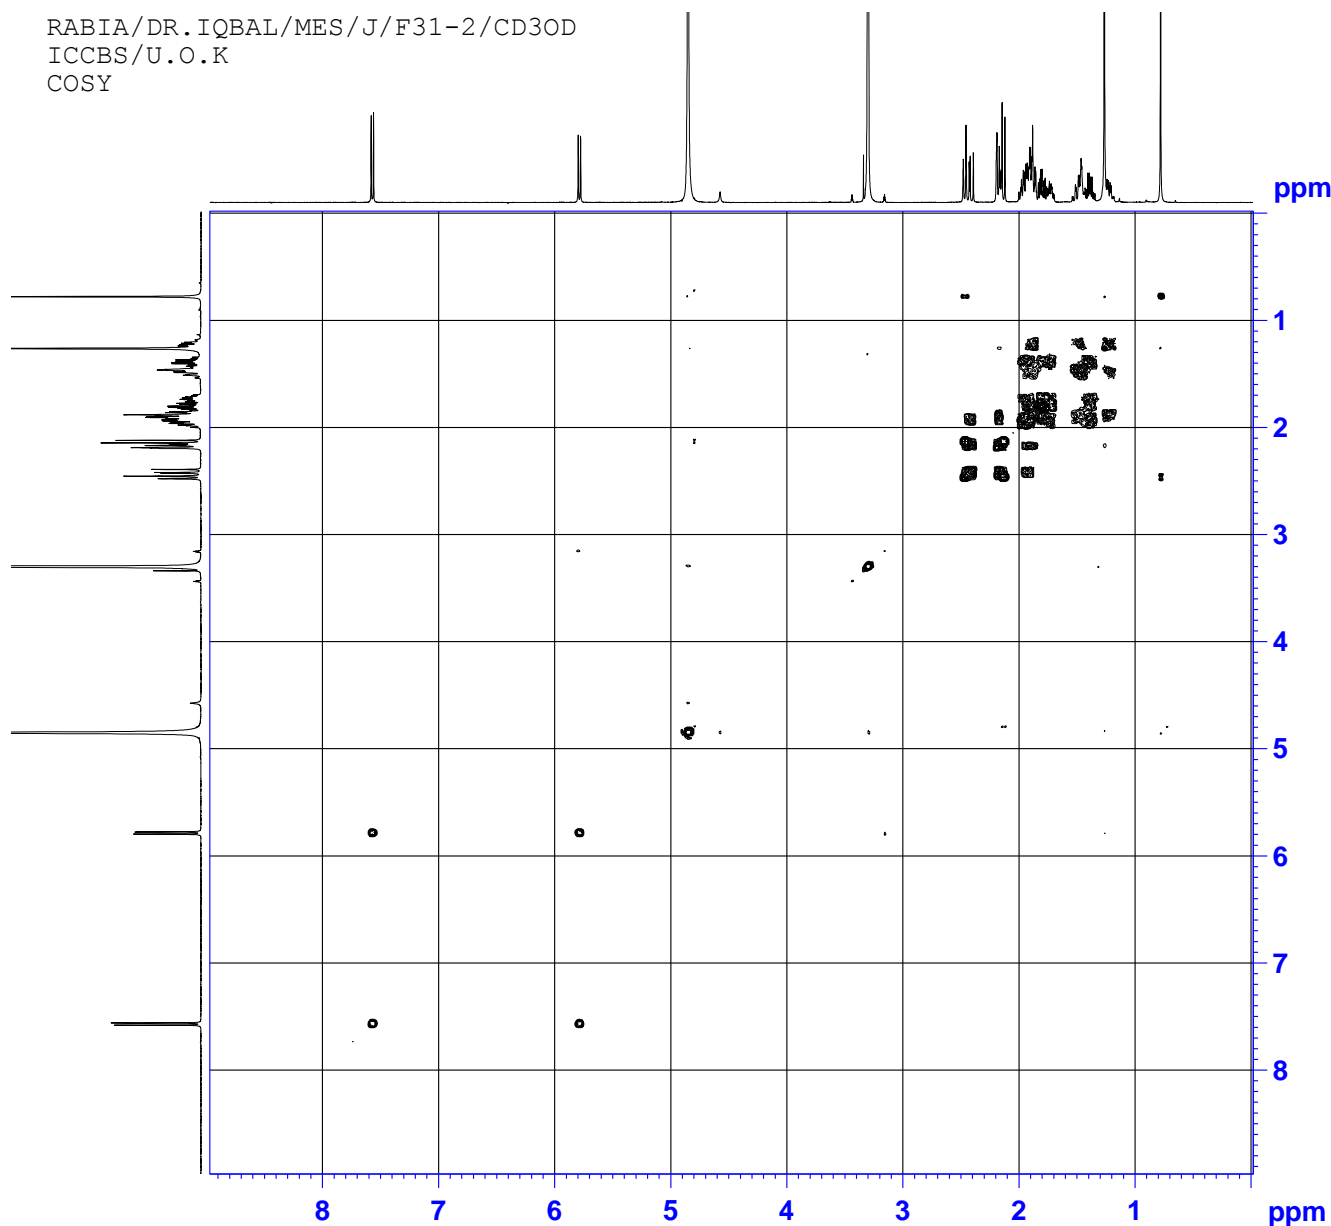

Current Data Parameters  
NAME compd 2  
EXPNO 11  
PROCNO 1

F2 - Acquisition Parameters  
Date\_ 20160107  
Time 19.35  
INSTRUM spect  
PROBHD 5 mm PABBI 1H/  
PULPROG cosydfqf  
TD 2048  
SOLVENT MeOD  
NS 8  
DS 8  
SWH 4496.403 Hz  
FIDRES 2.195509 Hz  
AQ 0.2277376 sec  
RG 574.7  
DW 111.200 usec  
DE 6.50 usec  
TE 298.0 K  
D0 0.00000300 sec  
D1 1.50000000 sec  
D13 0.00000400 sec  
D20 0 sec  
IN0 0.00022240 sec

===== CHANNEL f1 =====  
NUC1 1H  
P1 8.03 usec  
PL1 3.00 dB  
SFO1 500.2322510 MHz

F1 - Acquisition parameters  
TD 256  
SFO1 500.2323 MHz  
FIDRES 35.128147 Hz  
SW 8.989 ppm  
FnMODE QF

F2 - Processing parameters  
SI 1024  
SF 500.2300120 MHz  
WDW QSINE  
SSB 0  
LB 0 Hz  
GB 0  
PC 1.00

F1 - Processing parameters  
SI 1024  
MC2 QF  
SF 500.2300120 MHz  
WDW QSINE  
SSB 0  
LB 0 Hz  
GB 0

RABIA/DR. IQBAL/MES/J/F31-2/CD3OD  
 ICCBS/U.O.K  
 NOESY

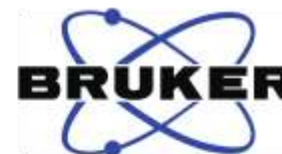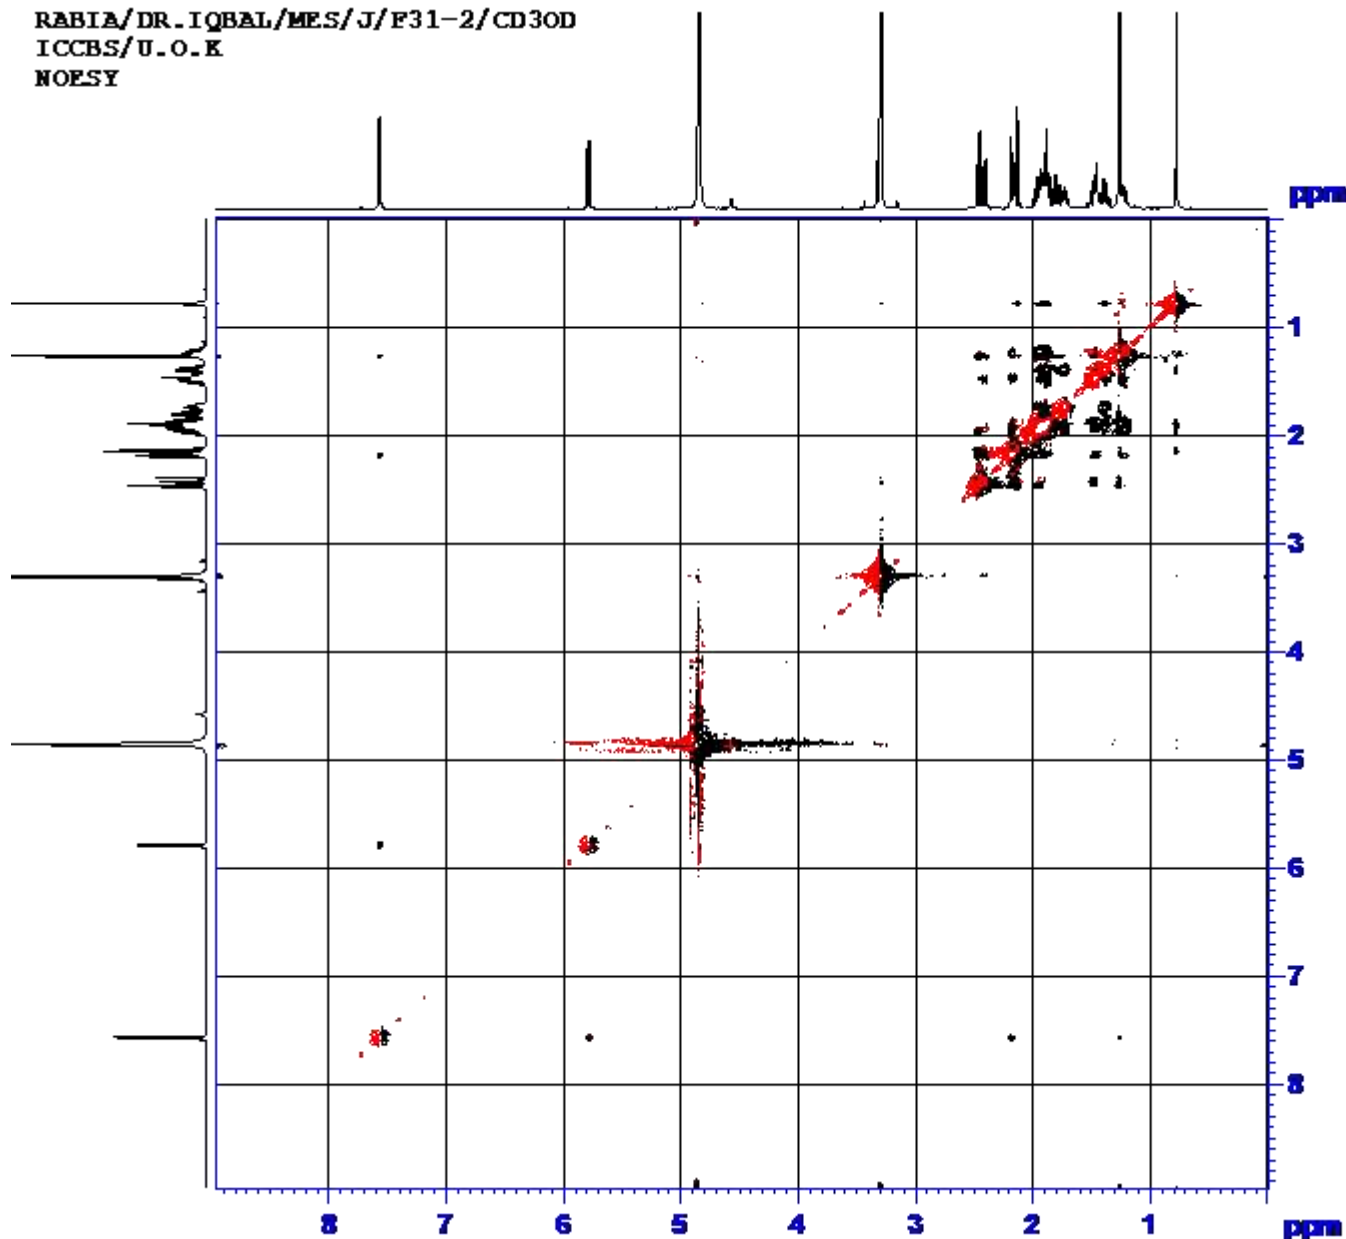

Current Data Parameters  
 NAME comp2  
 EXPNO 12  
 PROCNO 1

F2 - Acquisition Parameters  
 Date\_ 20150107  
 Time\_ 20.37  
 INSTRUM spect  
 PROCNO 5 nm F300 1H/  
 PULPROG zgpg30  
 TD 2048  
 SOLVENT MeOD  
 NS 16  
 DS 8  
 SSB 4496.403 Hz  
 FIDRES 2.193309 Hz  
 AQ 0.2277376 sec  
 RC 1523.5  
 RM 111.200 msec  
 DE 6.50 msec  
 TE 297.7 K  
 D0 0.0000038 sec  
 D1 2.0000000 sec  
 D2 0.8000000 sec  
 D15 0.0002000 sec  
 LBD 0.0002240 sec

CHANNEL f1  
 NUCL 1H  
 P1 8.03 msec  
 P2 16.06 msec  
 PFL 3.00 dB  
 SFO1 500.2322510 MHz

GRADIENT CHANNEL  
 CHOM[1] SIDE 1.00  
 CHOM[2] SIDE 1.00  
 CEN1 40.00 G  
 CEN2 -40.00 G  
 P15 1000.00 msec

F1 - Acquisition parameters  
 TD 256  
 SFO1 500.2323 MHz  
 FIDRES 35.128147 Hz  
 SN 8.989 ppm  
 PPMODE States-TFPI

F2 - Processing parameters  
 SI 1024  
 SF 500.2300120 MHz  
 WM GSIW  
 SSB 2  
 LB 0 Hz  
 GB 0  
 PC 1.00

F1 - Processing parameters  
 SI 1024  
 MC2 States-TFPI  
 SF 500.2300120 MHz  
 WM GSIW  
 SSB 2  
 LB 0 Hz  
 GB 0
