# Supplementary material for: Microbial transformation of mestanolone byMacrophomina phaseolinaandCunninghamella blakesleeanaand anticancer activities of the transformed products
Source: Royal Society of Chemistry journal article supplement (doi:10.1039/c8ra01309h), 2018-01-01
Supplement: c8ra01309h3.pdf [file c8ra01309h3.pdf]

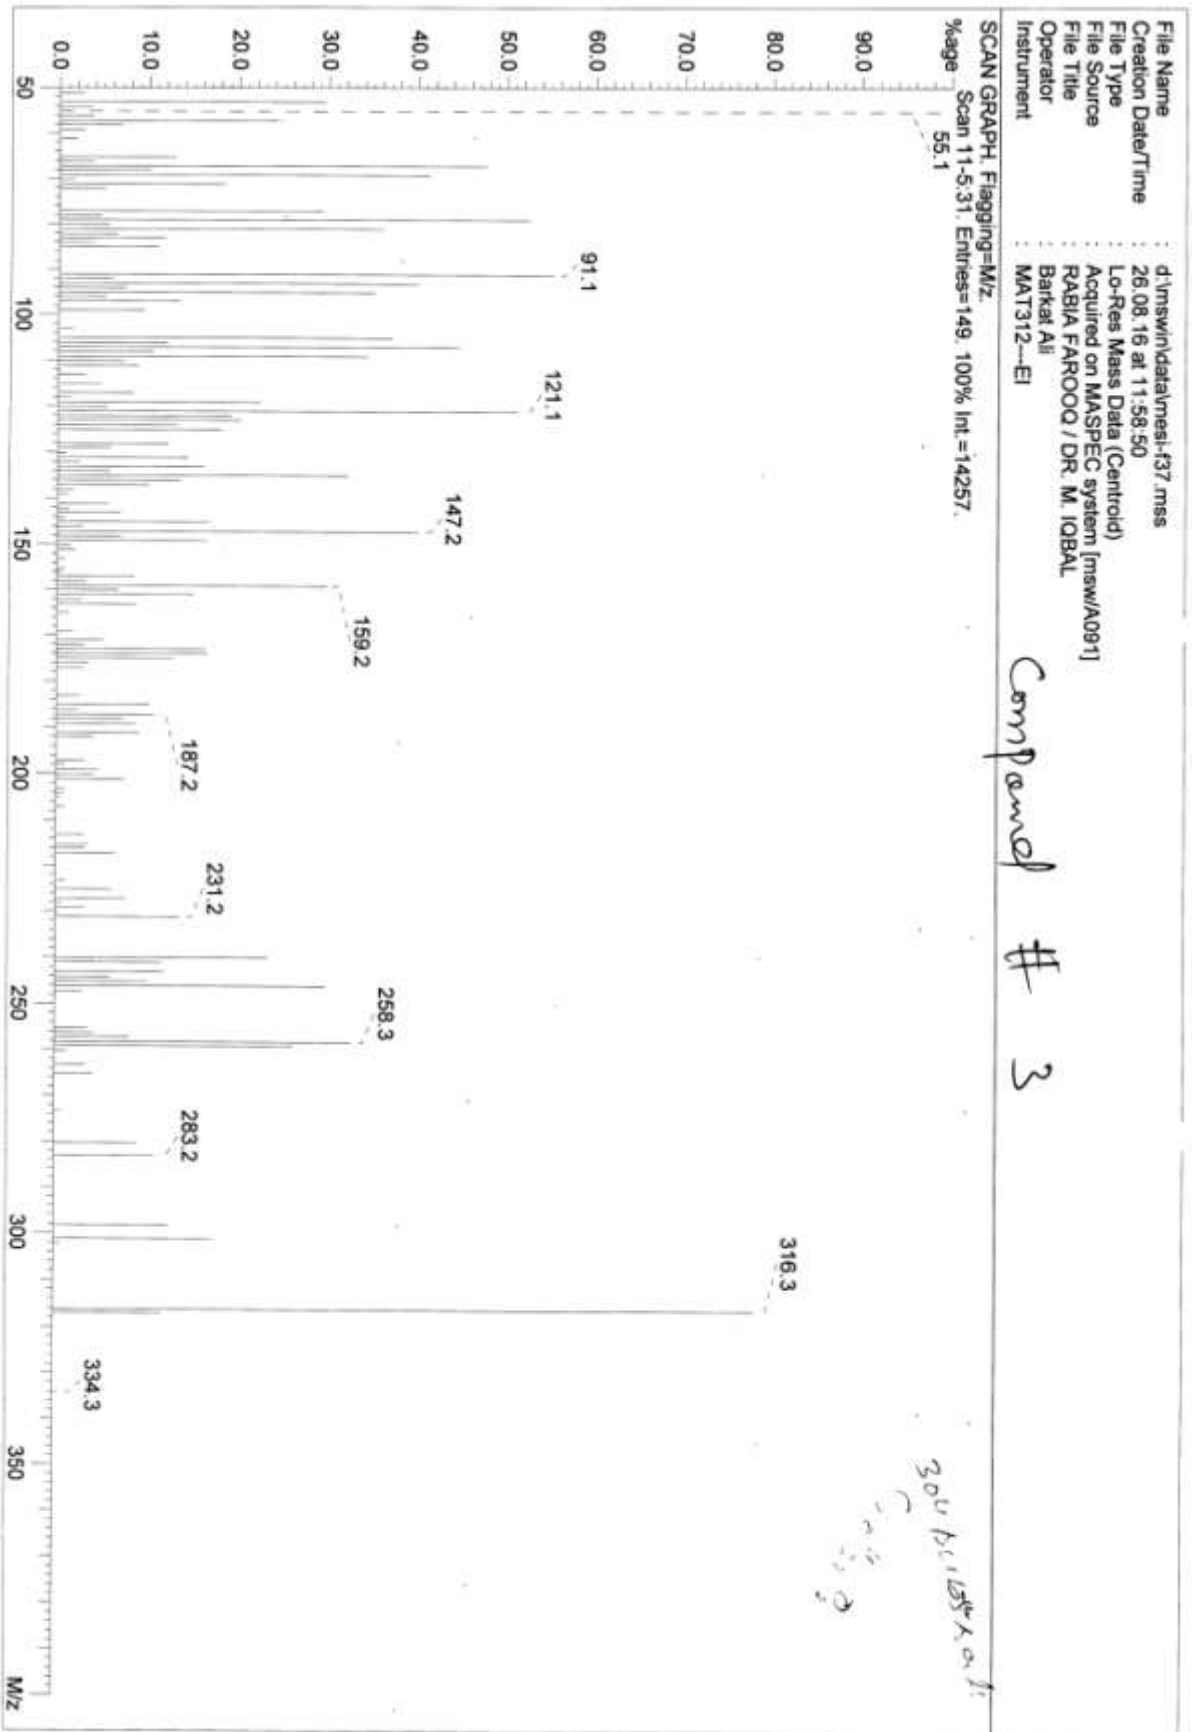

# Compound # 3

| Mass       | Relative Intensity | Theoretical Mass | Delta [ppm] | Delta [amu] | RDB  | Composition                                    |
|------------|--------------------|------------------|-------------|-------------|------|------------------------------------------------|
| 281.1814   | 3.1                | 280.1886         | -23.0       | -6.4        | 0.0  | C <sub>13</sub> H <sub>23</sub> O <sub>4</sub> |
| 282.1971   | 1.9                | 281.1753         | 21.6        | 6.1         | 4.5  | C <sub>14</sub> H <sub>25</sub> O <sub>4</sub> |
| 283.1681   | 18.6               | 282.1984         | -4.5        | -1.3        | 8.0  | C <sub>15</sub> H <sub>27</sub> O <sub>4</sub> |
| 284.1740   | 4.5                | 283.1698         | -6.0        | -1.7        | 8.5  | C <sub>16</sub> H <sub>29</sub> O <sub>4</sub> |
| 285.1826   | 2.1                | 284.1776         | -12.8       | -3.6        | 9.0  | C <sub>17</sub> H <sub>31</sub> O <sub>4</sub> |
| 286.1886   | 0.6                | 285.1855         | -9.9        | -2.8        | 7.5  | C <sub>18</sub> H <sub>33</sub> O <sub>4</sub> |
| 287.1758   | 0.6                | 286.1933         | -16.3       | -4.7        | 7.0  | C <sub>19</sub> H <sub>35</sub> O <sub>4</sub> |
| 287.1843   | 0.7                | 287.1800         | -14.6       | -4.2        | 11.5 | C <sub>20</sub> H <sub>37</sub> O <sub>4</sub> |
| 287.1916   | 0.6                | 287.1858         | -5.4        | -1.5        | 2.5  | C <sub>15</sub> H <sub>27</sub> O <sub>5</sub> |
| 288.2050   | 0.8                | 287.1800         | 15.1        | 4.3         | 11.5 | C <sub>16</sub> H <sub>29</sub> O <sub>5</sub> |
| 289.1879   | 0.3                | 287.1858         | 19.9        | 5.7         | 2.5  | C <sub>17</sub> H <sub>31</sub> O <sub>5</sub> |
|            |                    | 288.2089         | -13.5       | -3.9        | 6.0  | C <sub>18</sub> H <sub>33</sub> O <sub>5</sub> |
|            |                    | 289.1804         | 26.1        | 7.5         | 6.5  | C <sub>19</sub> H <sub>35</sub> O <sub>5</sub> |
|            |                    | 289.1956         | -26.7       | -7.7        | 10.5 | C <sub>20</sub> H <sub>37</sub> O <sub>5</sub> |
| 291.1880   | 0.9                | 291.1808         | 24.8        | 7.2         | 1.5  | C <sub>14</sub> H <sub>27</sub> O <sub>6</sub> |
|            |                    | 291.1960         | -27.6       | -8.0        | 5.5  | C <sub>15</sub> H <sub>29</sub> O <sub>6</sub> |
| 292.1863   | 0.4                | 292.1886         | -8.0        | -2.3        | 1.0  | C <sub>16</sub> H <sub>31</sub> O <sub>6</sub> |
|            |                    | 292.1827         | 12.1        | 3.5         | 10.0 | C <sub>17</sub> H <sub>33</sub> O <sub>6</sub> |
| 293.1344   | 0.2                | 293.1330         | 4.8         | 1.4         | 19.5 | C <sub>18</sub> H <sub>35</sub> O <sub>6</sub> |
|            |                    | 293.1389         | -15.3       | -4.5        | 6.5  | C <sub>19</sub> H <sub>37</sub> O <sub>6</sub> |
| 294.1685   | 0.3                | 294.1679         | 2.4         | 0.7         | 1.0  | C <sub>20</sub> H <sub>39</sub> O <sub>6</sub> |
|            |                    | 294.1620         | 22.3        | 6.6         | 10.0 | C <sub>21</sub> H <sub>41</sub> O <sub>6</sub> |
| 295.1922   | 0.2                | 295.1909         | 4.4         | 1.3         | 4.5  | C <sub>17</sub> H <sub>37</sub> O <sub>7</sub> |
| 296.1775   | 1.8                | 296.1776         | -0.6        | -0.2        | 9.0  | C <sub>18</sub> H <sub>39</sub> O <sub>7</sub> |
|            |                    | 296.1835         | -20.4       | -6.0        | 0.0  | C <sub>19</sub> H <sub>41</sub> O <sub>7</sub> |
| 297.1798   | 1.0                | 297.1855         | -19.0       | -5.7        | 8.5  | C <sub>20</sub> H <sub>43</sub> O <sub>7</sub> |
| 298.1924   | 50.3               | 298.1933         | -2.9        | -0.9        | 8.0  | C <sub>21</sub> H <sub>45</sub> O <sub>7</sub> |
| 299.1965   | 11.9               | 299.2011         | -15.3       | -4.6        | 7.5  | C <sub>22</sub> H <sub>47</sub> O <sub>7</sub> |
| 300.2019   | 3.2                | 300.2089         | -23.6       | -7.1        | 7.0  | C <sub>23</sub> H <sub>49</sub> O <sub>7</sub> |
|            |                    | 300.1937         | 27.2        | 8.2         | 3.0  | C <sub>14</sub> H <sub>29</sub> O <sub>8</sub> |
| 301.1807   | 14.4               | 301.1804         | 1.1         | 0.3         | 7.5  | C <sub>15</sub> H <sub>31</sub> O <sub>8</sub> |
| 302.1824   | 3.3                | 302.1882         | -19.3       | -5.8        | 7.0  | C <sub>16</sub> H <sub>33</sub> O <sub>8</sub> |
| 303.1924   | 0.4                | 303.1960         | -11.8       | -3.6        | 6.5  | C <sub>17</sub> H <sub>35</sub> O <sub>8</sub> |
| 309.2234   | 0.2                | 309.2218         | 5.2         | 1.6         | 8.5  | C <sub>18</sub> H <sub>37</sub> O <sub>8</sub> |
| 312.1770   | 0.3                | 312.1784         | -4.7        | -1.5        | 0.0  | C <sub>19</sub> H <sub>39</sub> O <sub>8</sub> |
|            |                    | 312.1725         | 14.1        | 4.4         | 9.0  | C <sub>20</sub> H <sub>41</sub> O <sub>8</sub> |
| 314.1904   | 1.1                | 314.1882         | 7.0         | 2.2         | 8.0  | C <sub>21</sub> H <sub>43</sub> O <sub>8</sub> |
| 315.2019   | 0.4                | 315.1960         | 18.6        | 5.9         | 7.5  | C <sub>22</sub> H <sub>45</sub> O <sub>8</sub> |
|            |                    | 315.2113         | -29.8       | -9.4        | 11.5 | C <sub>23</sub> H <sub>47</sub> O <sub>8</sub> |
| 316.2060   | 34.1               | 316.2038         | 6.9         | 2.2         | 7.0  | C <sub>14</sub> H <sub>31</sub> O <sub>9</sub> |
| 317.2092   | 8.6                | 317.2117         | -7.8        | -2.5        | 6.5  | C <sub>15</sub> H <sub>33</sub> O <sub>9</sub> |
| 318.2143   | 1.4                | 318.2195         | -16.3       | -5.2        | 6.0  | C <sub>16</sub> H <sub>35</sub> O <sub>9</sub> |
| 319.2074   | 0.3                | 319.2062         | 3.9         | 1.3         | 10.5 | C <sub>17</sub> H <sub>37</sub> O <sub>9</sub> |
| ✓ 334.2140 | 0.9                | 319.2121         | -14.5       | -4.6        | 1.5  | C <sub>18</sub> H <sub>39</sub> O <sub>9</sub> |
|            |                    | 334.2144         | -1.4        | -0.5        | 6.0  | C <sub>19</sub> H <sub>41</sub> O <sub>9</sub> |
| 335.2279   | 0.3                | 335.2222         | 17.0        | 5.7         | 5.5  | C <sub>20</sub> H <sub>43</sub> O <sub>9</sub> |
|            |                    | 335.2375         | -28.5       | -9.6        | 9.5  | C <sub>21</sub> H <sub>45</sub> O <sub>9</sub> |

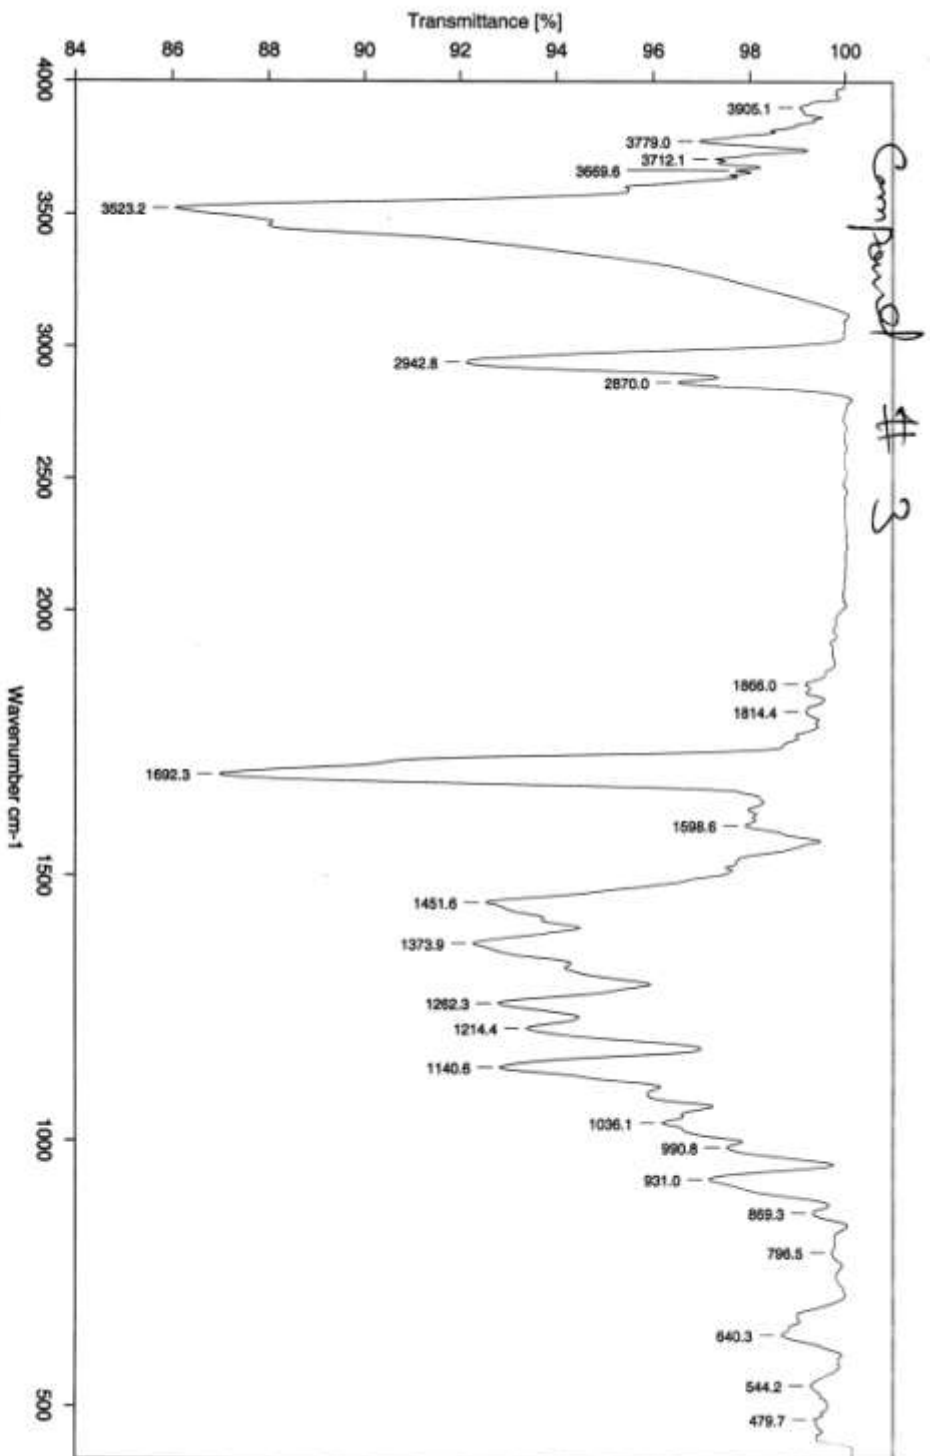

Sample : Mes/J/F37/Rabia Farooq/Prof. Dr. M. I. Choudhary  
Measured : 10/11/2016 on VECTOR22  
Resolution : 4 cm-1 ( 10 scans )  
Spectrum : F37.0 (in D:\IRSTUDENT\MesJ)  
Technic : SOLID  
Analyst : M.Qasir/ZQ

RABIA/DR.IQBAL/MES.I.F37  
1H/.

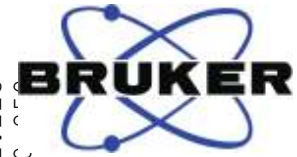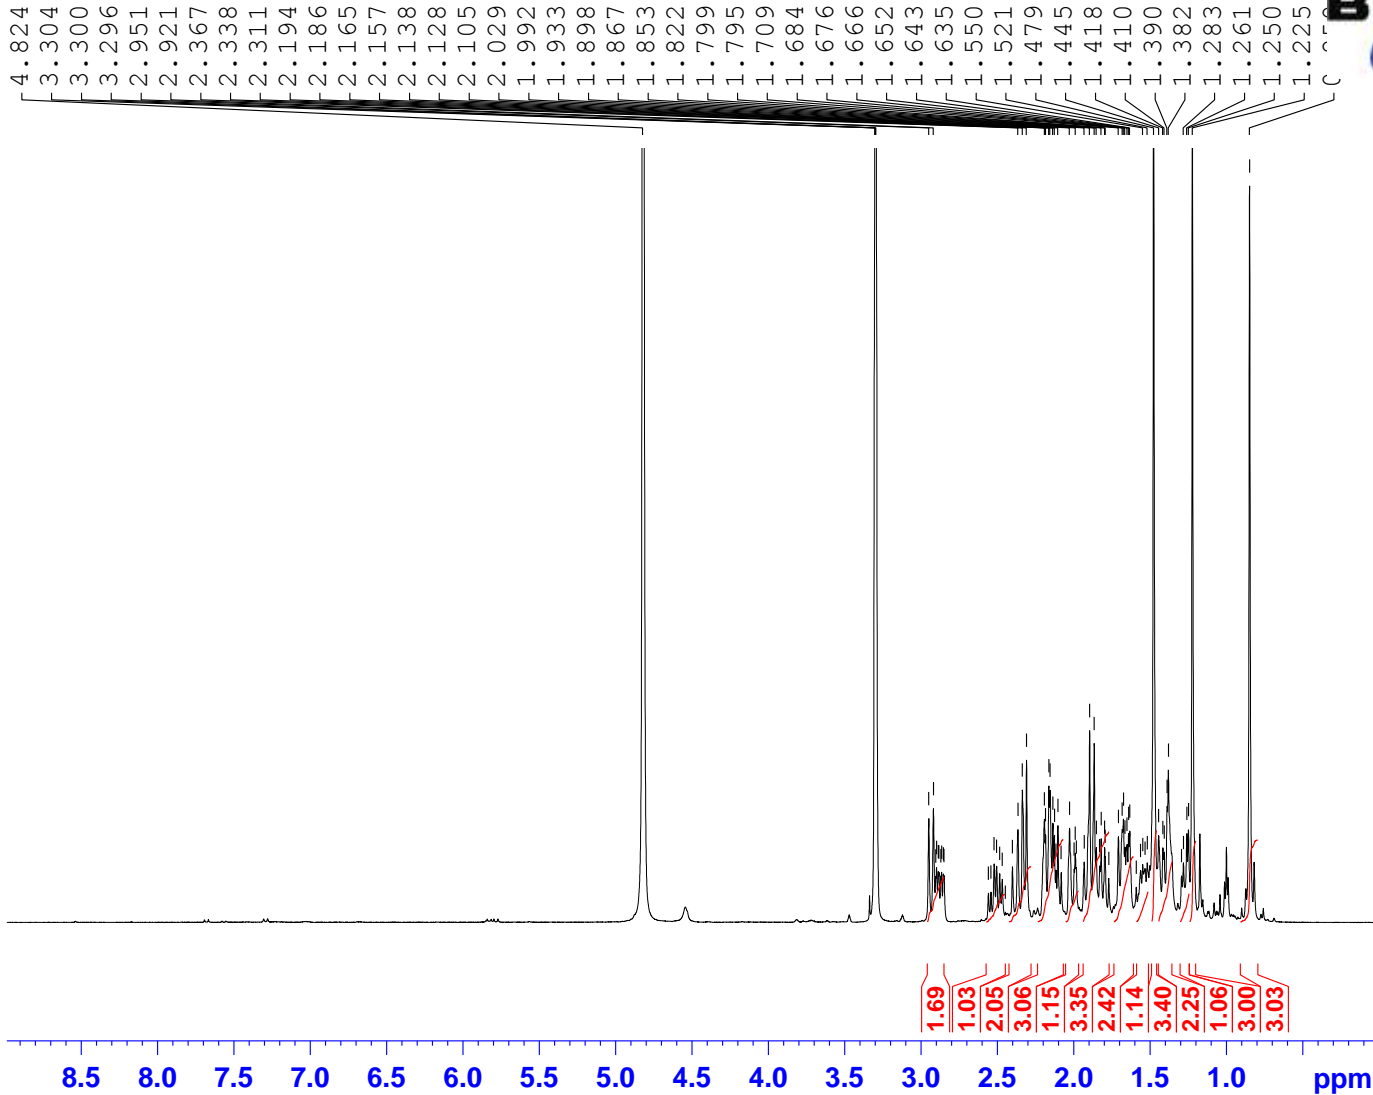

Current Data Parameters  
NAME compd 3  
EXPNO 1  
PROCNO 1

F2 - Acquisition Parameters  
Date\_ 20160527  
Time\_ 15.24  
INSTRUM spect  
PROBHD 5 mm SEI 1H-13  
PULPROG zg30  
TD 65536  
SOLVENT MeOD  
NS 128  
DS 0  
SWH 8012.820 Hz  
FIDRES 0.122266 Hz  
AQ 4.0894465 sec  
RG 228.1  
DW 62.400 usec  
DE 6.50 usec  
TE 300.0 K  
D1 2.0000000 sec  
TD0 1

==== CHANNEL f1 =====  
NUC1 1H  
P1 10.80 usec  
PL1 3.00 dB  
SFO1 400.0332002 MHz

F2 - Processing parameters  
SI 32768  
SF 400.0300087 MHz  
WDW EM  
SSB 0  
LB 0.30 Hz  
GB 0  
PC 0.20

Rabia / Dr. Iqbal / Mes.j.f.37  
BB

214.66  
214.40

83.45  
81.52  
59.16  
55.45  
49.85  
49.57  
49.29  
49.00  
48.72  
48.44  
48.32  
48.15  
47.60  
45.18  
43.49  
40.00  
38.71  
38.52  
36.56  
32.62

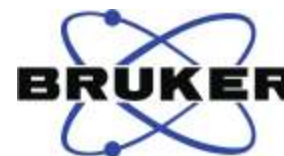

Current Data Parameters  
NAME compd 3  
EXPNO 2  
PROCNO 1

F2 - Acquisition Parameters  
Date\_ 20160811  
Time\_ 15.10  
INSTRUM Spect  
PROBHD 5 mm BBO BB-1H  
PULPROG zgpg  
TD 32768  
SOLVENT MeOD  
NS 20480  
DS 2  
SWH 18028.846 Hz  
FIDRES 0.550197 Hz  
AQ 0.9087659 sec  
RG 80.6  
DW 27.733 usec  
DE 6.50 usec  
TE 300.0 K  
D1 1.5000000 sec  
D11 0.0300000 sec  
TD0 20

==== CHANNEL f1 =====  
NUC1 13C  
P1 12.00 usec  
PL1 0 dB  
PL1W 28.88669395 W  
SF01 75.4764278 MHz

==== CHANNEL f2 =====  
CPDPRG[2] waltz16  
NUC2 1H  
PCPD2 80.00 usec  
PL2 0 dB  
PL12 16.12 dB  
PL13 17.00 dB  
PL2W 13.16228485 W  
PL12W 0.32161123 W  
PL13W 0.26262212 W  
SF02 300.1315007 MHz

F2 - Processing parameters  
SI 16384  
SF 75.4676416 MHz  
WDW EM  
SSB 0  
LB 1.00 Hz  
GB 0  
PC 1.00

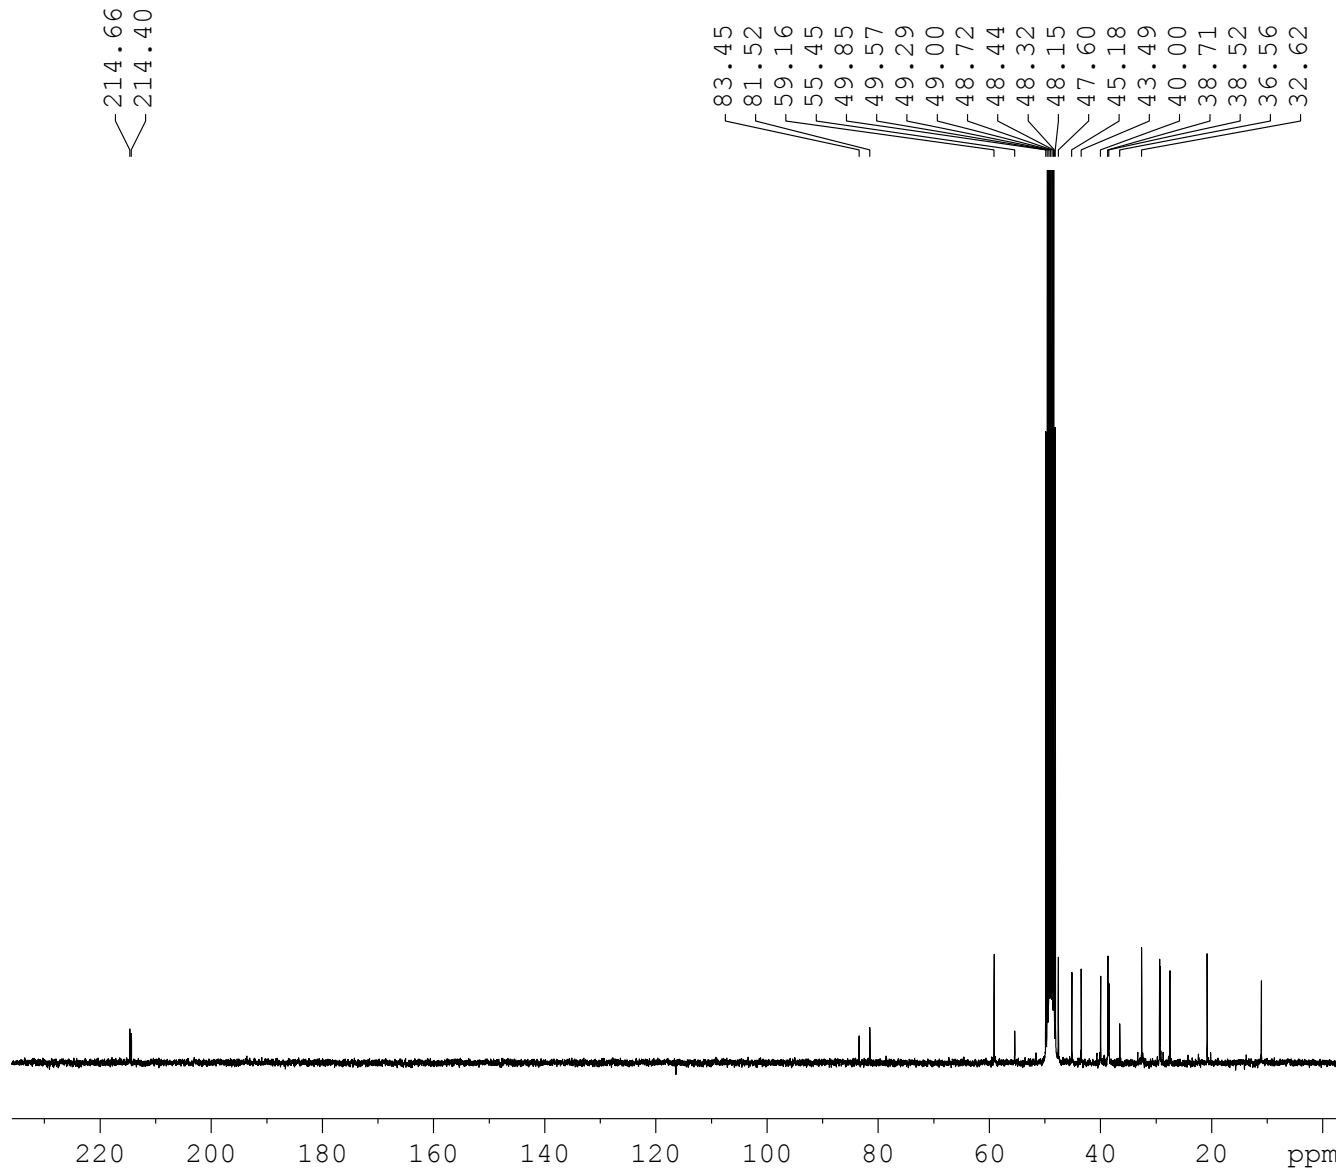

Rabia / Dr. Iqbal / Mes.j.f.37  
DEPT135

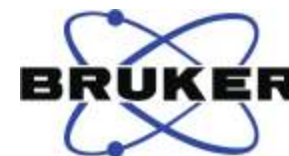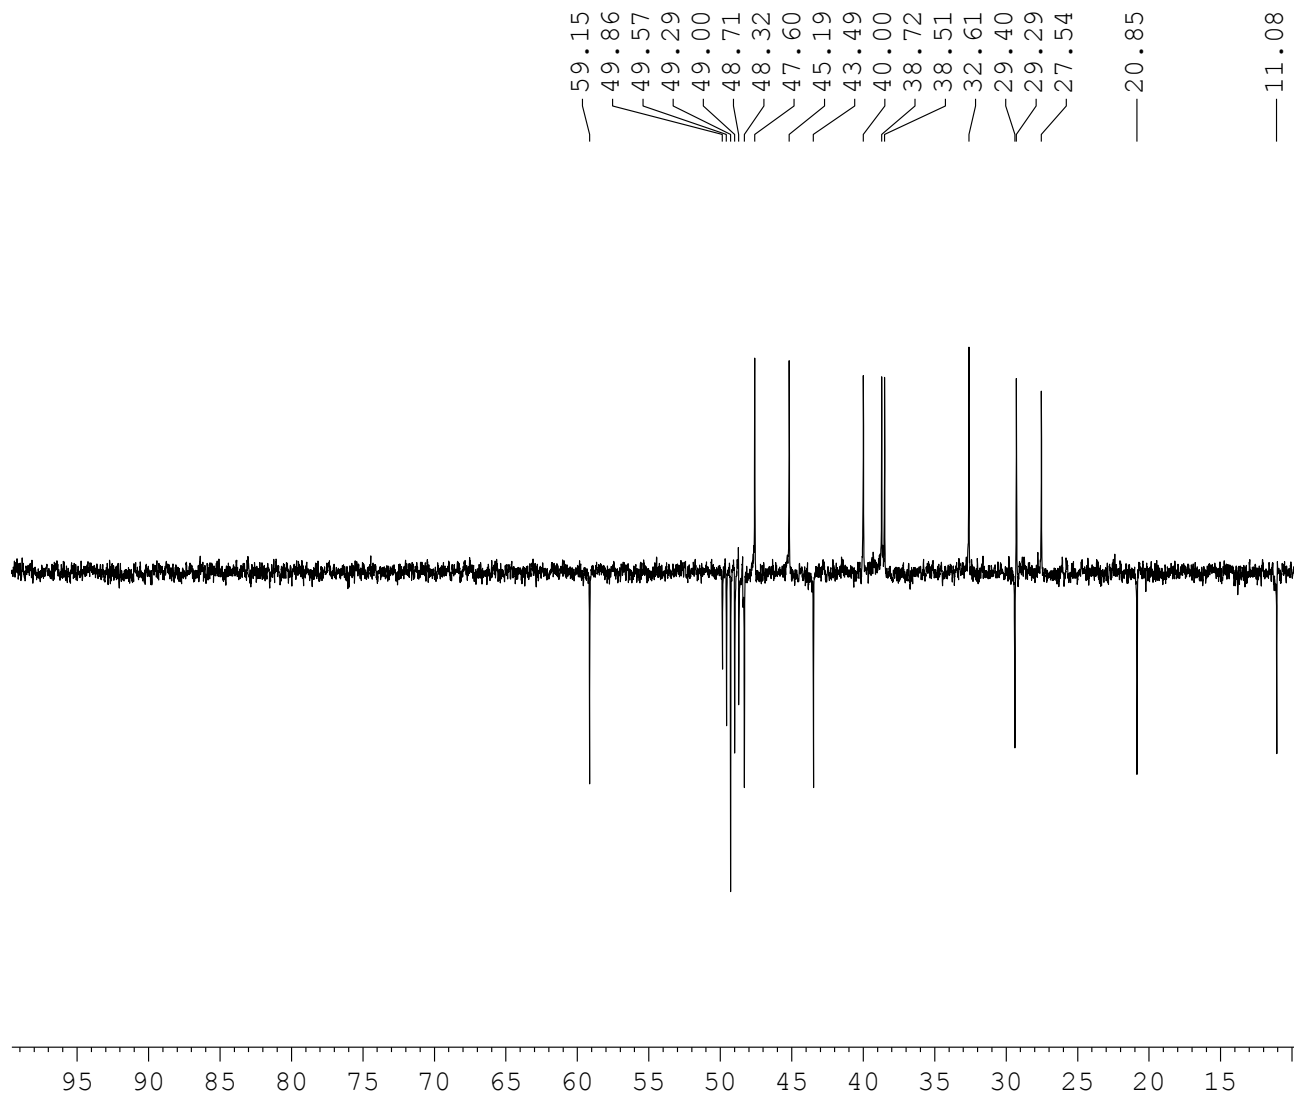

Current Data Parameters  
NAME compd 3  
EXPNO 7  
PROCNO 1

F2 - Acquisition Parameters  
Date\_ 20160812  
Time\_ 5.18  
INSTRUM Spect  
PROBHD 5 mm BBO BB-1H  
PULPROG dept135  
TD 32768  
SOLVENT MeOD  
NS 10240  
DS 2  
SWH 14367.816 Hz  
FIDRES 0.438471 Hz  
AQ 1.1403264 sec  
RG 203  
DW 34.800 usec  
DE 6.50 usec  
TE 300.0 K  
CNST2 145.0000000  
D1 1.50000000 sec  
D2 0.00344828 sec  
D12 0.00002000 sec  
TD0 10

==== CHANNEL f1 =====  
NUC1 13C  
P1 12.00 usec  
P2 24.00 usec  
PL1 0 dB  
PL1W 28.88669395 W  
SFO1 75.4749184 MHz

==== CHANNEL f2 =====  
CPDPRG[2] waltz16  
NUC2 1H  
P3 12.50 usec  
P4 25.00 usec  
PCPD2 80.00 usec  
PL2 0 dB  
PL12 16.12 dB  
PL2W 13.16228485 W  
PL12W 0.32161123 W  
SFO2 300.1315007 MHz

F2 - Processing parameters  
SI 16384  
SF 75.4676416 MHz  
WDW EM  
SSB 0  
LB 1.00 Hz  
GB 0  
1.20

Rabia / Dr. Iqbal / Mes.j.f.37  
DEPT-90

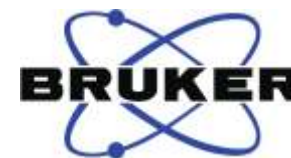

— 59.16  
49.86  
49.57  
49.00  
48.71  
48.32  
43.49  
29.29  
27.54

Current Data Parameters  
NAME compd 3  
EXPNO 8  
PROCNO 1

F2 - Acquisition Parameters  
Date\_ 20160812  
Time 12.54  
INSTRUM Spect  
PROBHD 5 mm BBO BB-1H  
PULPROG dept90  
TD 32768  
SOLVENT MeOD  
NS 3072  
DS 2  
SWH 14367.816 Hz  
FIDRES 0.438471 Hz  
AQ 1.1403264 sec  
RG 203  
DW 34.800 usec  
DE 6.50 usec  
TE 300.0 K  
CNST2 145.0000000  
D1 1.50000000 sec  
D2 0.00344828 sec  
D12 0.00002000 sec  
TD0 3

==== CHANNEL f1 =====  
NUC1 13C  
P1 12.00 usec  
P2 24.00 usec  
PL1 0 dB  
PL1W 28.88669395 W  
SFO1 75.4749184 MHz

==== CHANNEL f2 =====  
CPDPRG[2] waltz16  
NUC2 1H  
P3 12.50 usec  
P4 25.00 usec  
PCPD2 80.00 usec  
PL2 0 dB  
PL12 16.12 dB  
PL2W 13.16228485 W  
PL12W 0.32161123 W  
SFO2 300.1315007 MHz

F2 - Processing parameters  
SI 16384  
SF 75.4676416 MHz  
WDW EM  
SSB 0  
LB 1.00 Hz  
GB 0  
PC 1.00

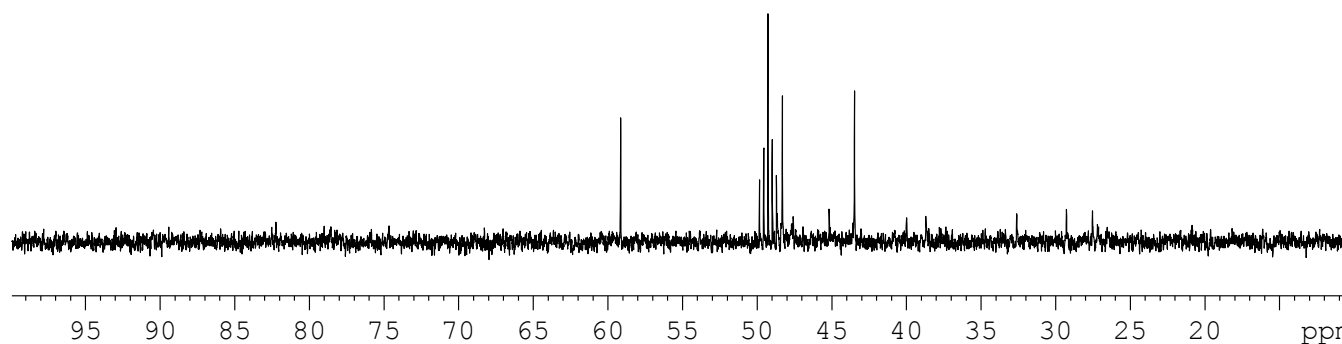

RABIA FAROOQ/DR. IQBAL/MES/J/F37/CD3OD  
HSQC

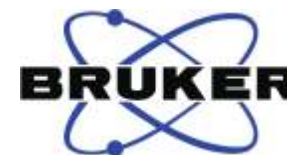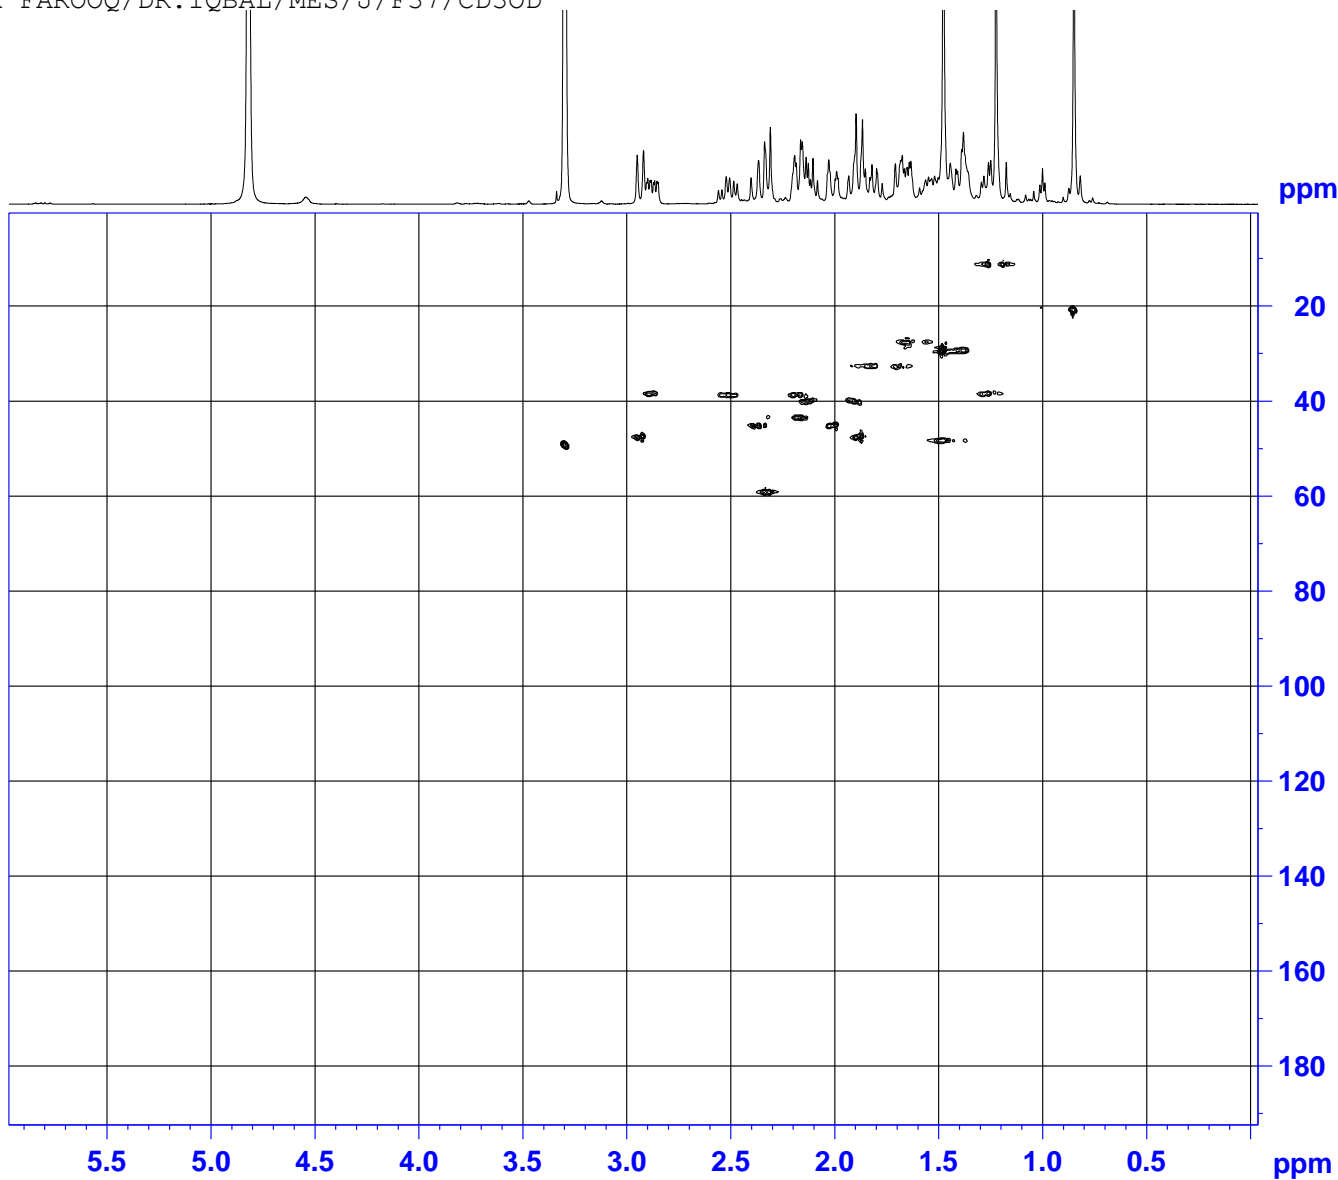

Current Data Parameters  
NAME compd 3  
EXPNO 4  
PROCNO 1

F2 - Acquisition Parameters  
Date 20160607  
Time 20.33  
INSTRUM spect  
PROBHD 5 mm BBI 1H/D-  
PULPROG hsqcedetgp  
TD 1024  
SOLVENT MeOD  
NS 32  
DS 8  
SWH 3004.608 Hz  
FIDRES 2.934382 Hz  
AQ 0.1703936 sec  
RG 26008  
DW 166.400 usec  
DE 6.50 usec  
TE 299.8 K  
CNST2 145.000000  
D0 0.00000300 sec  
D1 1.50000000 sec  
D4 0.00172414 sec  
D11 0.03000000 sec  
D13 0.00000400 sec  
D16 0.00020000 sec  
D21 0.00350000 sec  
IN0 0.00002070 sec  
ZGOPTNS

==== CHANNEL f1 =====  
NUC1 1H  
P1 8.00 usec  
P2 16.00 usec  
P28 1000.00 usec  
PL1 -1.00 dB  
SFO1 500.1315004 MHz

==== CHANNEL f2 =====  
CPDPRG[2] garp  
NUC2 13C  
P3 12.70 usec  
P4 25.40 usec  
PCPD2 65.00 usec  
PL2 -3.00 dB  
PL12 11.67 dB  
SFO2 125.7697360 MHz

==== GRADIENT CHANNEL =====  
GPNAM[1] SINE.100  
GPNAM[2] SINE.100  
GFZ1 80.00 %  
GFZ2 20.10 %  
P16 1000.00 usec

F1 - Acquisition parameters  
TD 256  
SFO1 125.7697 MHz  
FIDRES 188.654602 Hz  
SW 192.000 ppm  
FnMODE Echo-Antiecho

F2 - Processing parameters  
SI 1024  
SF 500.1300158 MHz  
WDW QSINE  
SSB 2  
LB 0 Hz  
GB 0  
PC 4.00

F1 - Processing parameters  
SI 1024  
MC2 echo-antiecho  
SF 125.7576112 MHz  
WDW QSINE  
SSB 2  
LB 0 Hz  
GB 0



RABIA FAROOQ/DR. IQBAL/MES/J/F37/CD3OD  
ICCBS/U.O.K  
HMBC

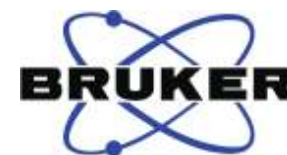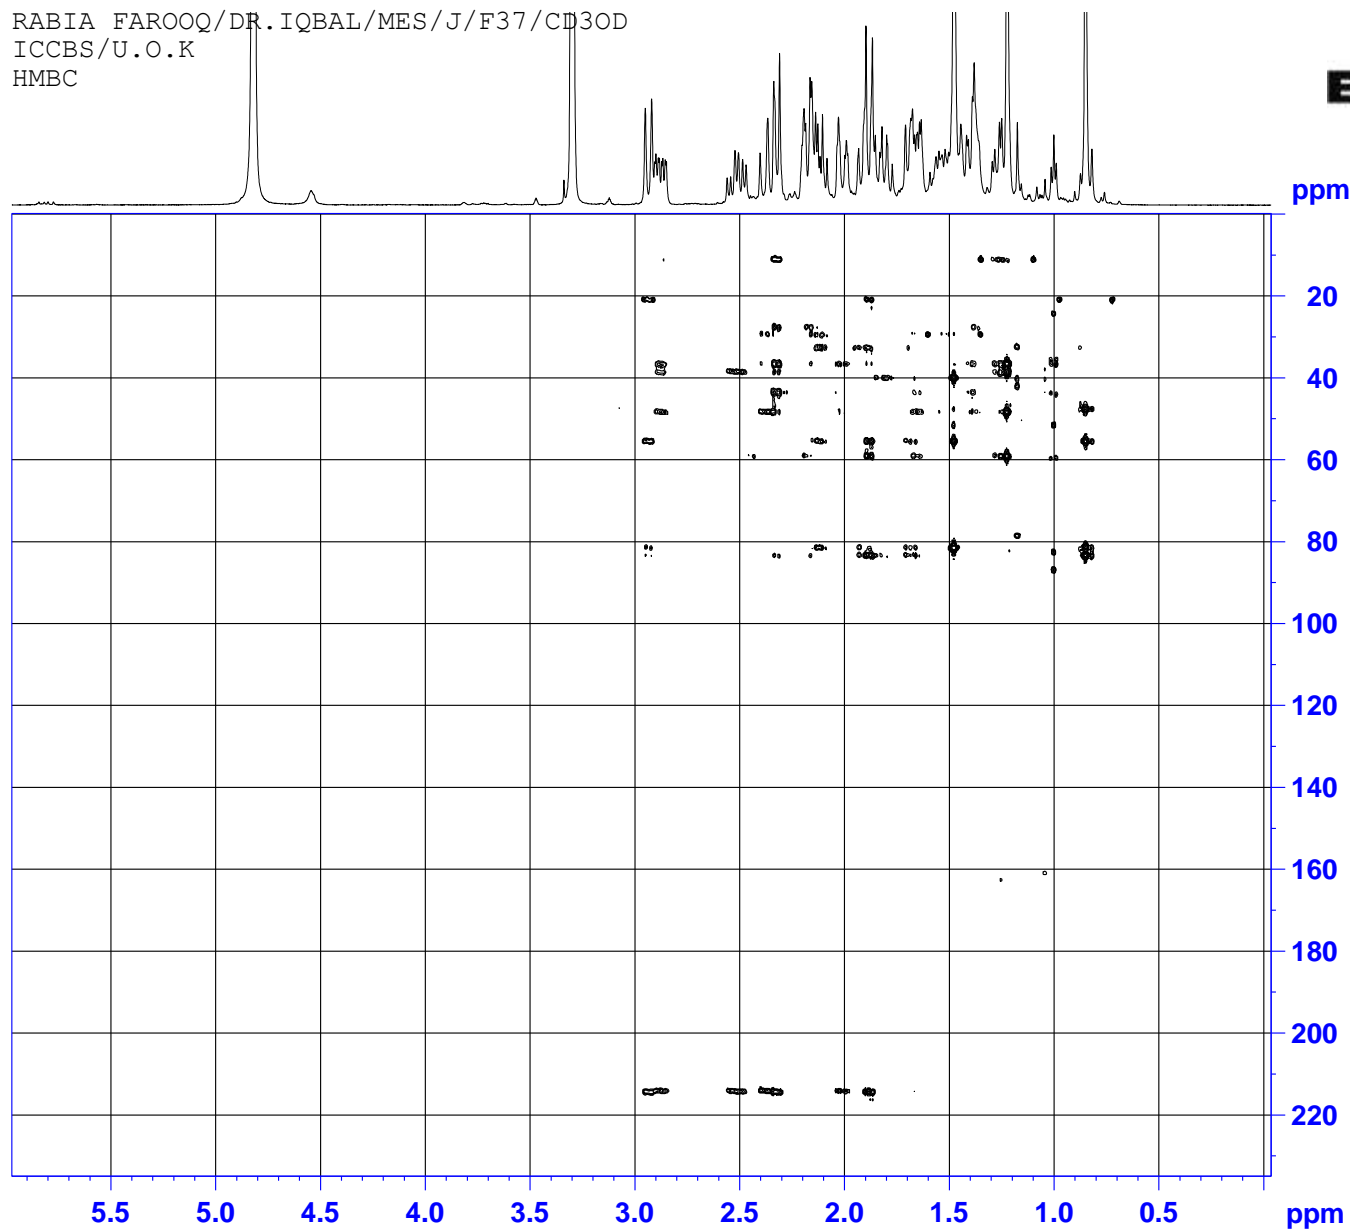

Current Data Parameters  
NAME compd 3  
EXPNO 5  
PROCNO 1

F2 - Acquisition Parameters  
Date\_ 20160608  
Time 0.26  
INSTRUM spect  
PROBHD 5 mm BBI 1H/D-  
PULPROG hmbcgp1pndqf  
TD 2048  
SOLVENT MeOD  
NS 64  
DS 8  
SWH 3004.808 Hz  
FIDRES 1.467191 Hz  
AQ 0.3407872 sec  
RG 20642.5  
DW 166.400 usec  
DE 6.50 usec  
TE 300.2 K  
CNST2 145.0000000  
CNST13 10.0000000  
D0 0.00000300 sec  
D1 2.00000000 sec  
D2 0.00344828 sec  
D6 0.05000000 sec  
D16 0.00020000 sec  
IN0 0.00001690 sec

==== CHANNEL f1 =====  
NUC1 1H  
P1 8.00 usec  
P2 16.00 usec  
PL1 -1.00 dB  
SFO1 500.1315004 MHz

==== CHANNEL f2 =====  
NUC2 13C  
P3 12.70 usec  
PL2 -3.00 dB  
SFO2 125.7723769 MHz

==== GRADIENT CHANNEL =====  
GPNAM[1] SINE.100  
GPNAM[2] SINE.100  
GPNAM[3] SINE.100  
GPZ1 50.00 %  
GPZ2 30.00 %  
GPZ3 40.10 %  
P16 1000.00 usec

F1 - Acquisition parameters  
TD 256  
SFO1 125.7724 MHz  
FIDRES 230.910217 Hz  
SW 235.000 ppm  
FMODE QF

F2 - Processing parameters  
SI 1024  
SF 500.1300158 MHz  
WDW SINE  
SSB 0  
LB 0 Hz  
GB 0  
PC 4.00

F1 - Processing parameters  
SI 1024  
MC2 QF  
SF 125.7576112 MHz  
WDW SINE  
SSB 0  
LB 0 Hz  
GB 0

RABIA FAROOQ/DR. IQBAL/MES/J/F37/CD3OD  
ICCBS/U.O.K  
COSY

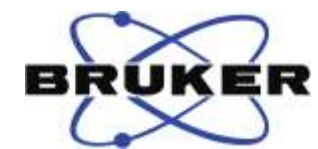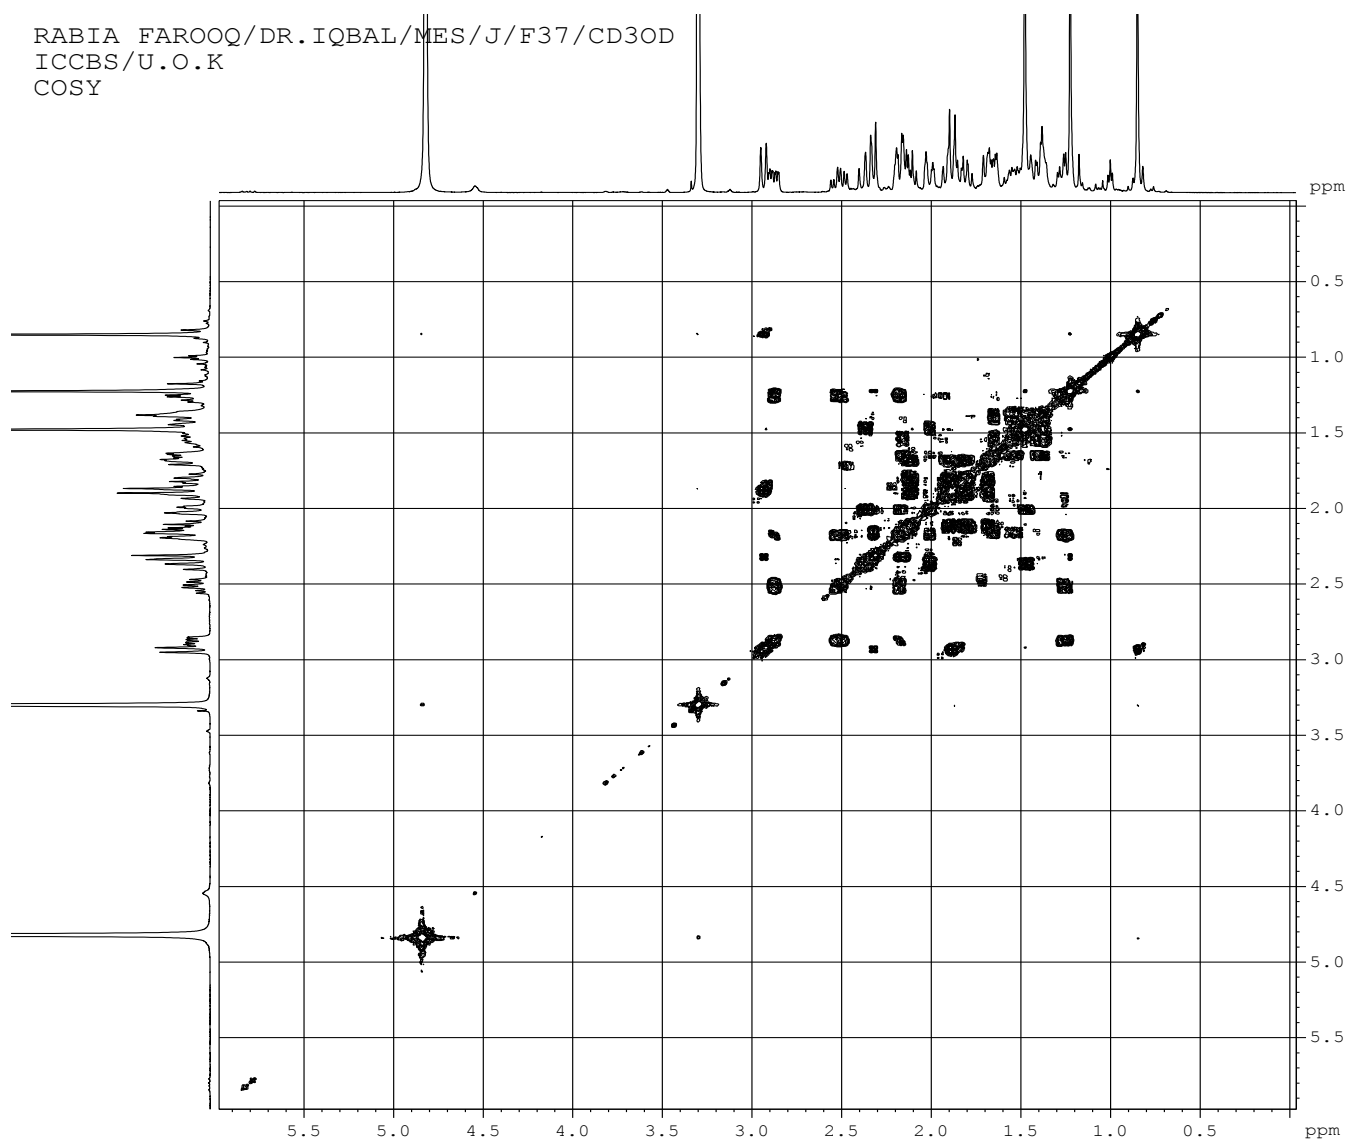

```
Current Data Parameters
NAME      compd 3
EXPNO     2
PROCNO    1

F2 - Acquisition Parameters
Date_     20160607
Time      15.51
INSTRUM   spect
PROBHD    5 mm BBI 1H/D-
PULPROG   cosygpqf
TD         2048
SOLVENT   MeOD
NS         8
DS         8
SWH        3004.808 Hz
FIDRES     1.467191 Hz
AQ         0.3407872 sec
RG         362
DW         166.400 usec
DE         6.50 usec
TE         298.7 K
D0         0.00000300 sec
D1         1.50000000 sec
D13        0.00000400 sec
D16        0.00020000 sec
IN0        0.00033280 sec

===== CHANNEL f1 =====
NUC1       1H
P0         8.00 usec
P1         8.00 usec
PL1        -1.00 dB
SFO1       500.1315004 MHz

===== GRADIENT CHANNEL =====
GPNAM[1]   SINE.100
GP21       10.00 %
P16        1000.00 usec

F1 - Acquisition parameters
TD         256
SFO1       500.1315 MHz
FIDRES     23.475063 Hz
SW         6.008 ppm
FnMODE     QF

F2 - Processing parameters
SI         1024
SF         500.1300158 MHz
WDW        SINE
SSB        0
LB         0 Hz
GB         0
PC         4.00

F1 - Processing parameters
SI         1024
MC2        QF
SF         500.1300158 MHz
WDW        SINE
SSB        0
LB         0 Hz
GB         0
```

RABIA FAROOQ/DR. IQBAL/MES/J/F37/CD3OD  
ICCBS/U.O.K  
NOESY

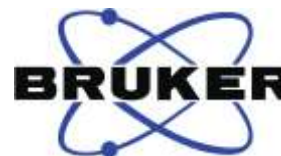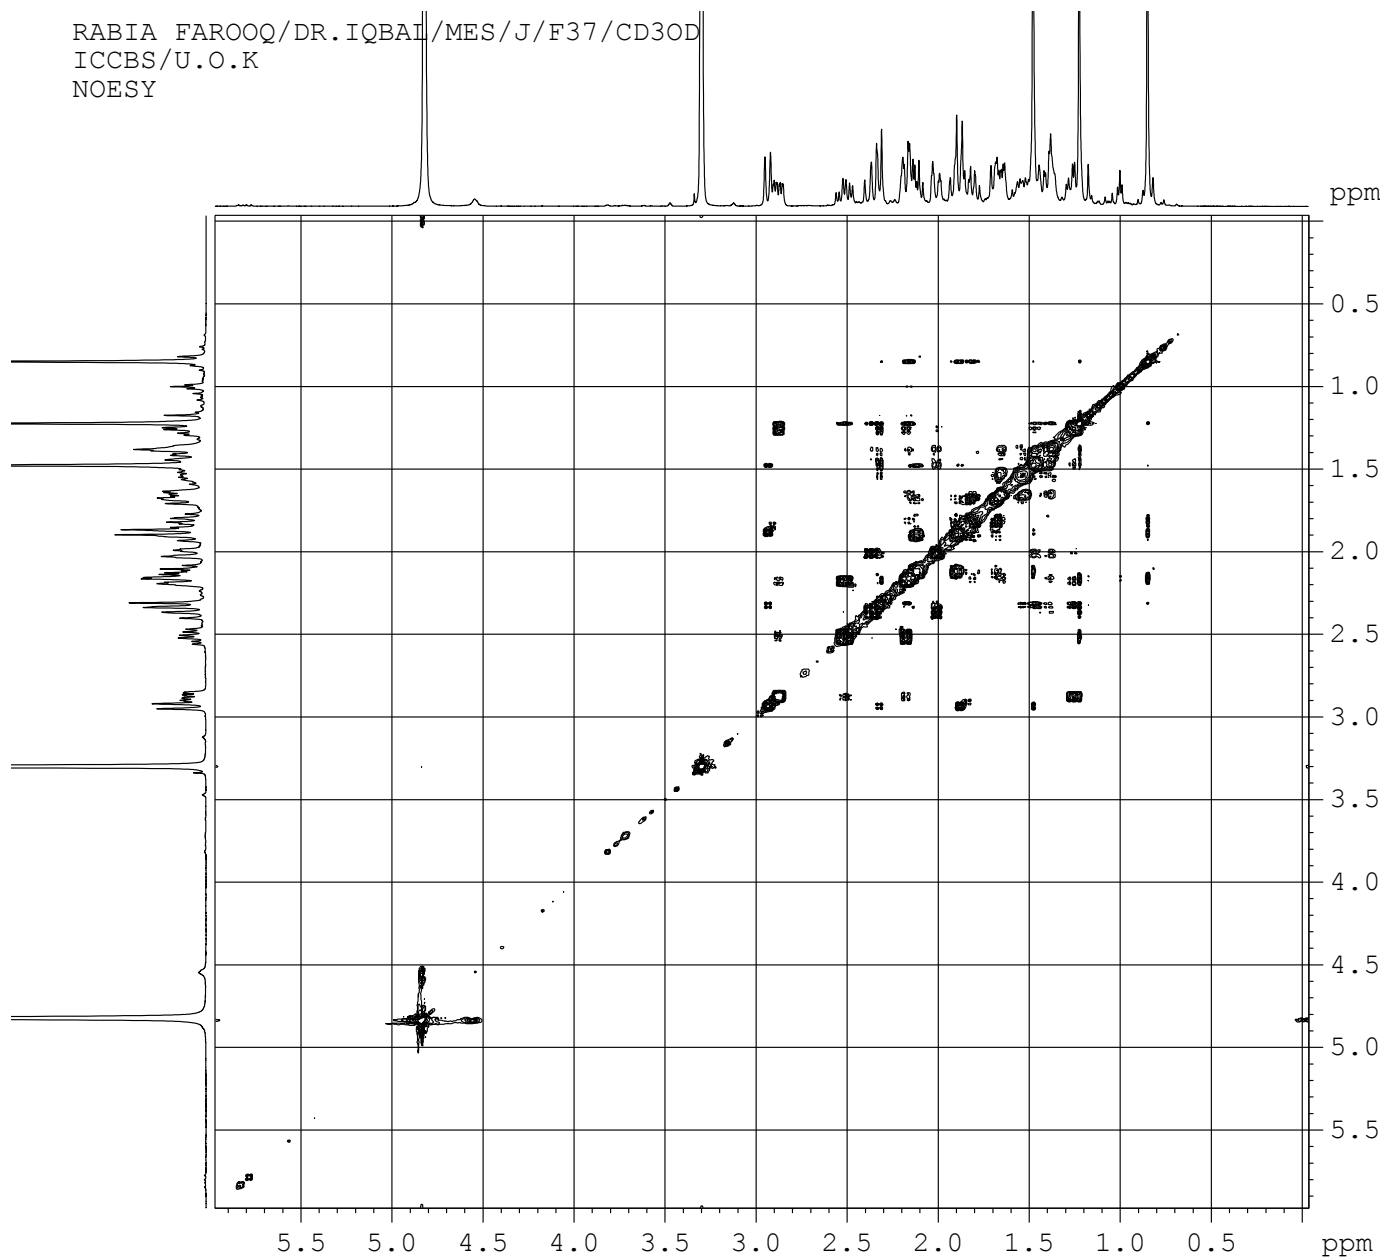

Current Data Parameters  
NAME compd 3  
EXPNO 3  
PROCNO 1

F2 - Acquisition Parameters  
Date\_ 20160607  
Time 16.57  
INSTRUM spect  
PROBHD 5 mm BBI 1H/D-  
PULPROG noesypph  
TD 2048  
SOLVENT MeOD  
NS 16  
DS 2  
SWH 3004.808 Hz  
FIDRES 1.467191 Hz  
AQ 0.3407872 sec  
RG 256  
DW 166.400 usec  
DE 6.50 usec  
TE 299.1 K  
D0 0.00015621 sec  
D1 2.00000000 sec  
D8 0.80000001 sec  
D16 0.00020000 sec  
IN0 0.00033280 sec

==== CHANNEL f1 =====  
NUC1 1H  
P1 8.00 usec  
P2 16.00 usec  
PL1 -1.00 dB  
SFO1 500.1315004 MHz

==== GRADIENT CHANNEL =====  
GPNAM[1] SINE.100  
GFZ1 40.00 %  
P16 1000.00 usec

F1 - Acquisition parameters  
TD 256  
SFO1 500.1315 MHz  
FIDRES 23.475063 Hz  
SW 6.008 ppm  
FnMODE States-TPPI

F2 - Processing parameters  
SI 1024  
SF 500.1300158 MHz  
WDW QSINE  
SSB 2  
LB 0 Hz  
GB 0  
PC 4.00

F1 - Processing parameters  
SI 1024  
MC2 States-TPPI  
SF 500.1300158 MHz  
WDW QSINE  
SSB 2  
LB 0 Hz  
GB 0

RABIA FAROOQ/DR. IQBAL/MES/J/F37/CD360  
NOESY

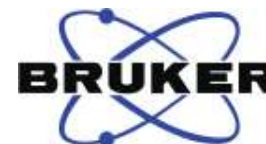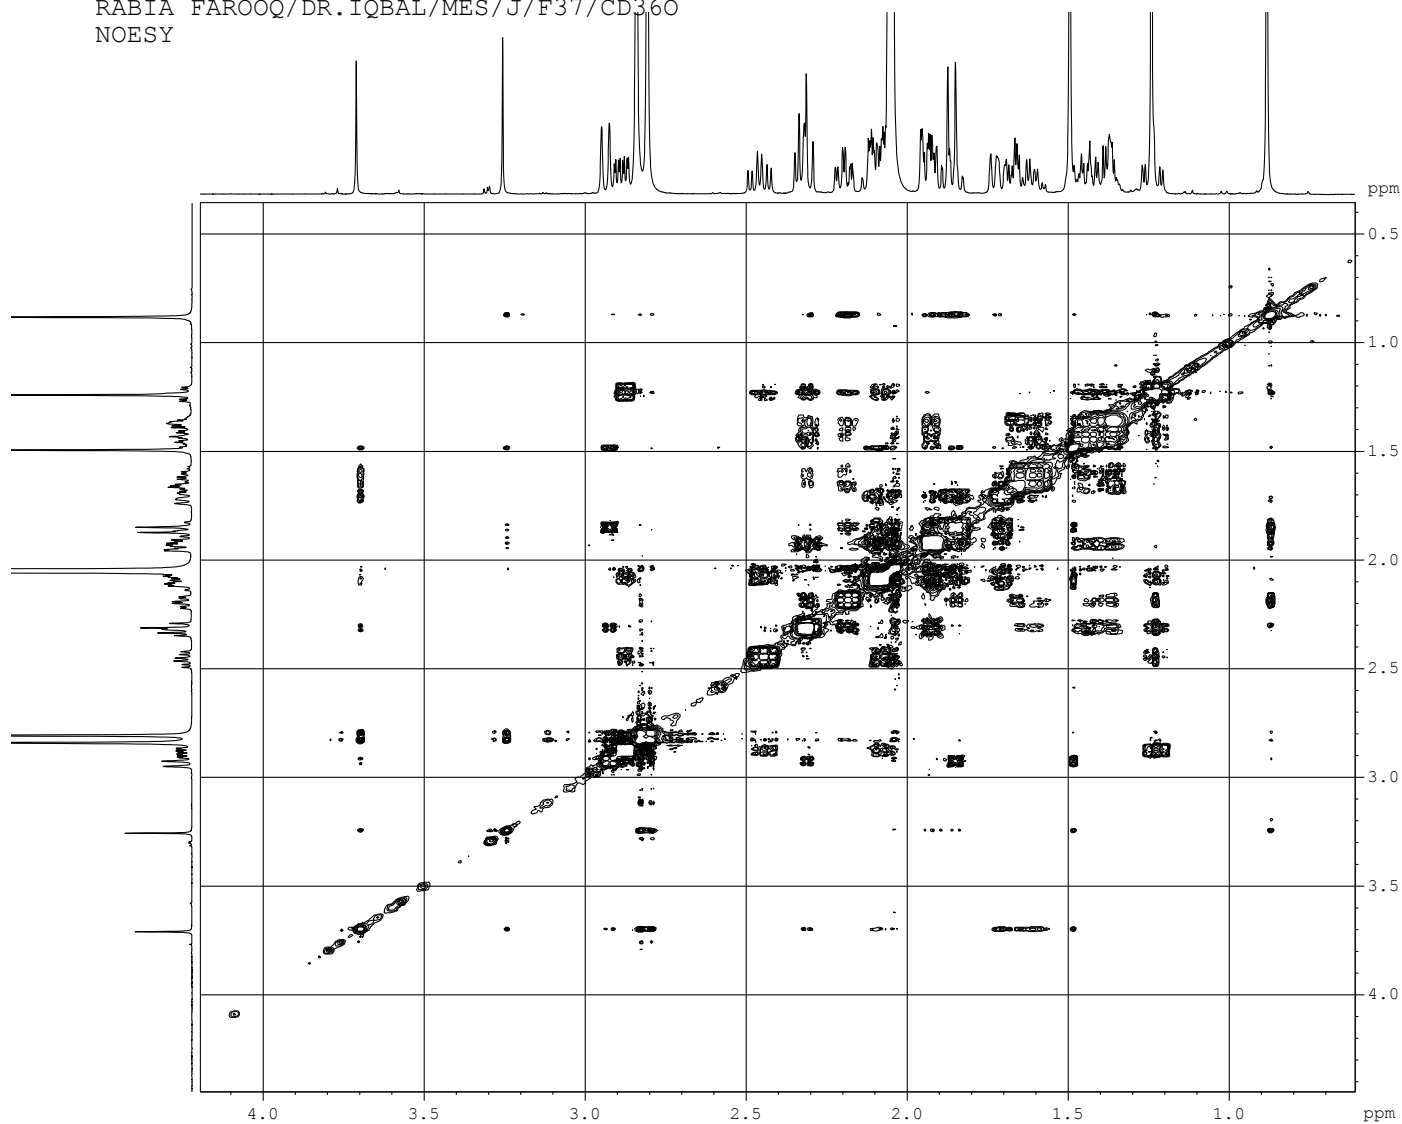

Current Data Parameters  
NAME mar14-18  
EXPNO 4  
PROCNO 1

F2 - Acquisition Parameters  
Date\_ 20180314  
Time 17.50  
INSTRUM spect  
PROBHD 5 mm PABBI 1H/  
PULPROG noesygpph  
TD 2048  
SOLVENT Acetone  
NS 16  
DS 8  
SWH 3004.808 Hz  
FIDRES 1.467191 Hz  
AQ 0.3407872 sec  
RG 1024  
DW 166.400 usec  
DE 6.50 usec  
TE 297.3 K  
DO 0.00015475 sec  
D1 2.00000000 sec  
D8 0.80000001 sec  
D16 0.00020000 sec  
IN0 0.00033280 sec

===== CHANNEL f1 =====  
NUC1 1H  
P1 9.15 usec  
P2 18.30 usec  
PL1 -0.50 dB  
SFO1 500.2315007 MHz

===== GRADIENT CHANNEL =====  
GPNAM[1] SINE.100  
GPNAM[2] SINE.100  
GPZ1 40.00 %  
GPZ2 -40.00 %  
P16 1000.00 usec

F1 - Acquisition parameters  
TD 256  
SFO1 500.2315 MHz  
FIDRES 23.475063 Hz  
SW 6.007 ppm  
FnMODE States-TPPI

F2 - Processing parameters  
SI 1024  
SF 500.2300110 MHz  
WDW QSINE  
SSB 2  
LB 0 Hz  
GB 0  
PC 1.00

F1 - Processing parameters  
SI 1024  
MC2 States-TPPI  
SF 500.2300110 MHz  
WDW QSINE  
SSB 2  
LB 0 Hz  
GB 0
