# Supplementary material for: Microbial transformation of mestanolone byMacrophomina phaseolinaandCunninghamella blakesleeanaand anticancer activities of the transformed products
Source: Royal Society of Chemistry journal article supplement (doi:10.1039/c8ra01309h), 2018-01-01
Supplement: c8ra01309h5.pdf [file c8ra01309h5.pdf]

File: MES-L-F31-1  
Sample: RABIA FAROOQ / DR. M. IQBAL  
Instrument: JEOL MS 600H-1

Date Run: 01-13-2016 (Time Run: 09:39:02)

Ionization mode: EI+

Scan: 15  
Base: m/z 261: 99.5%FS TIC: 14253086

R.T.: 1.25

*Compound # 5*

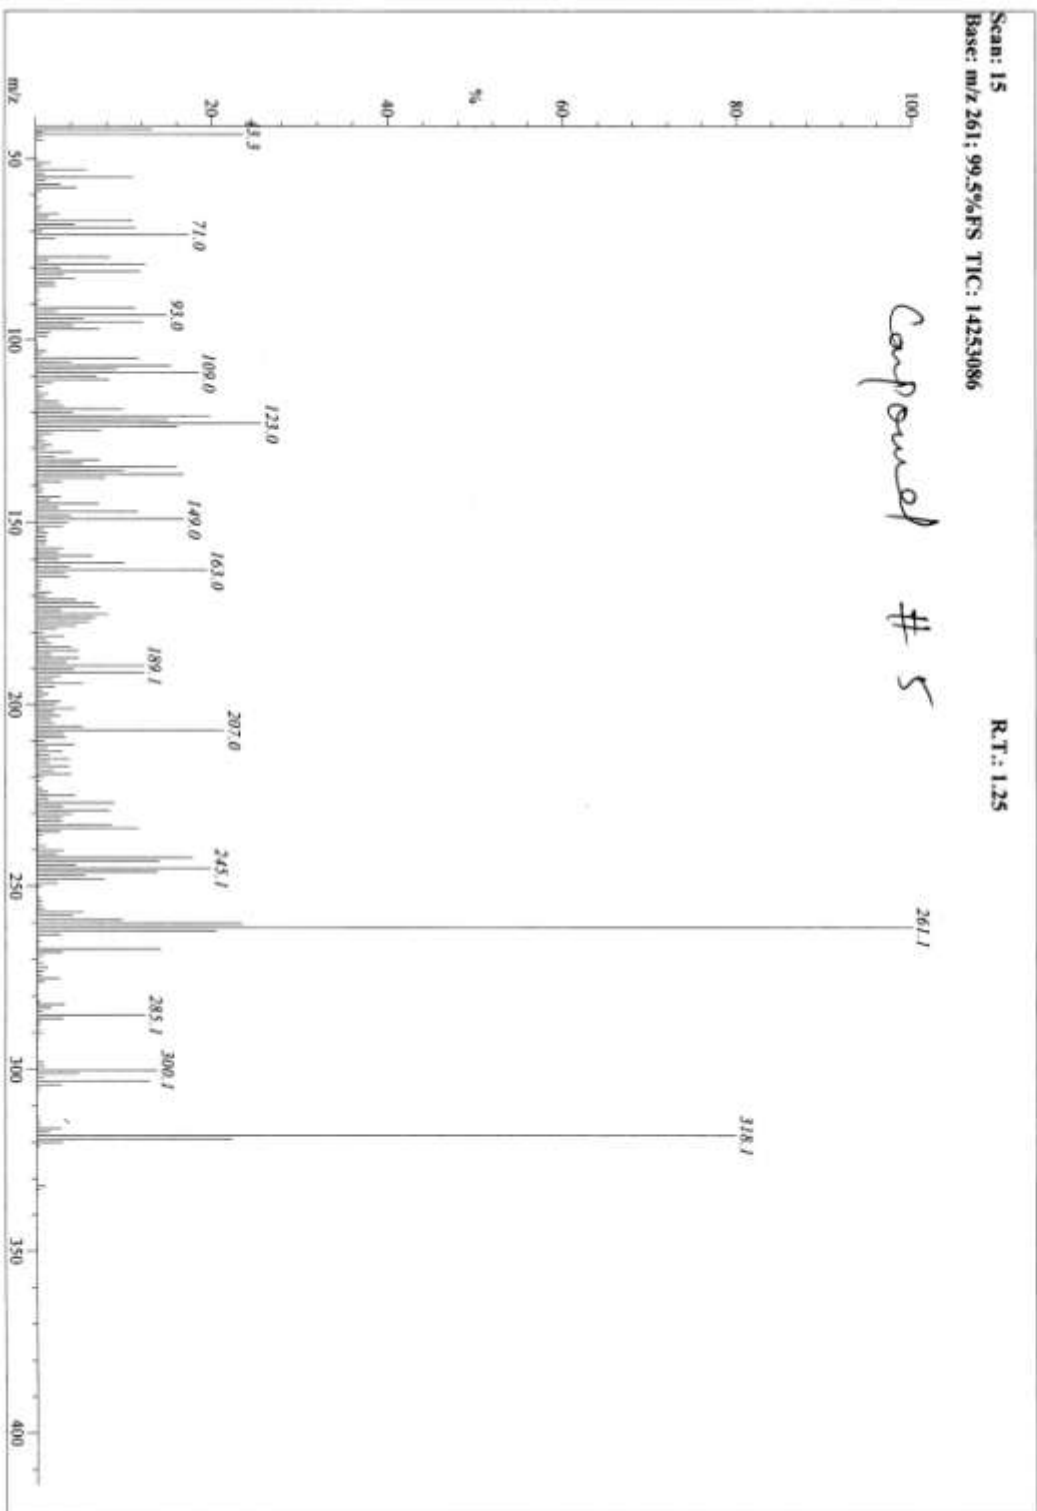

MESU / F 31-1  
 Kaban 5/15/2017

| Mass     | Theoretical Mass | Delta [ppm] | Delta [amu] | qM  | Composition                                    |
|----------|------------------|-------------|-------------|-----|------------------------------------------------|
| 318.2212 | 318.2189         | 7.1         | 2.3         | 6.0 | C <sub>20</sub> H <sub>36</sub> O <sub>2</sub> |
| 303.1931 | 303.1955         | -7.8        | -2.4        | 6.5 | C <sub>18</sub> H <sub>31</sub> O <sub>2</sub> |
| 300.2097 | 300.2084         | 4.4         | 1.3         | 7.0 | C <sub>20</sub> H <sub>34</sub> O <sub>2</sub> |

Compound # 5

Substrate  
 200  
 C<sub>20</sub>H<sub>32</sub>O<sub>2</sub>

RABIA FAROOQ/DR. IQBAL/MES/J/F31-1/CD3OD

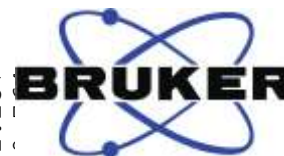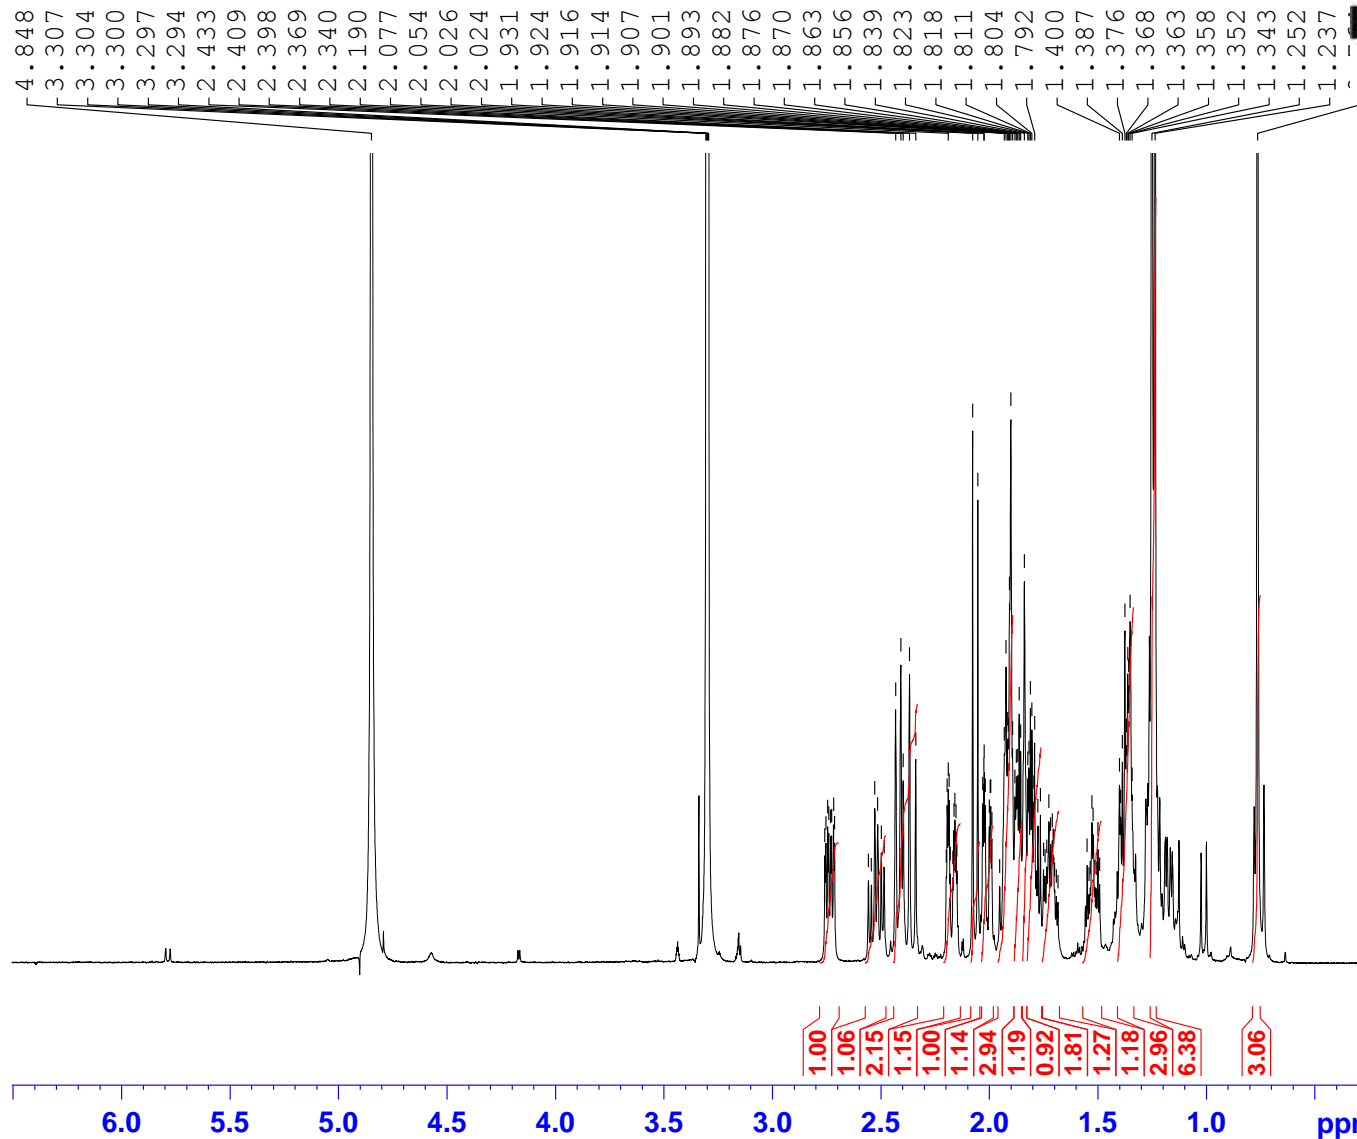

Current Data Parameters  
NAME com 5  
EXPNO 2  
PROCNO 1

F2 - Acquisition Parameters  
Date\_ 20151216  
Time 18.26  
INSTRUM spect  
PROBHD 5 mm PABBI 1H/  
PULPROG zg30  
TD 65536  
SOLVENT MeOD  
NS 64  
DS 0  
SWH 12019.230 Hz  
FIDRES 0.183399 Hz  
AQ 2.7262976 sec  
RG 228.1  
DW 41.600 usec  
DE 6.50 usec  
TE 298.1 K  
D1 1.50000000 sec  
TD0 1

==== CHANNEL f1 =====  
NUC1 1H  
P1 8.03 usec  
PL1 3.00 dB  
SFO1 500.2350023 MHz

F2 - Processing parameters  
SI 32768  
SF 500.2300118 MHz  
WDW EM  
SSB 0  
LB 0.30 Hz  
GB 0  
PC 1.00
