# Supplementary material for: Microbial transformation of mestanolone byMacrophomina phaseolinaandCunninghamella blakesleeanaand anticancer activities of the transformed products
Source: Royal Society of Chemistry journal article supplement (doi:10.1039/c8ra01309h), 2018-01-01
Supplement: c8ra01309h6.pdf [file c8ra01309h6.pdf]

5/23/2016 9:42:30 AM

File: MES-1-F34-1

Date Run: 05-23-2016 (Time Run: 09:31:17)

Sample: RABIA FAROOQ / DR. M. IQBAL

Ionization mode: EI+

Compound # 6

Scan: 45

R.T.: 3.88

Base: m/z 242; 62.2%FS TIC: 9234000

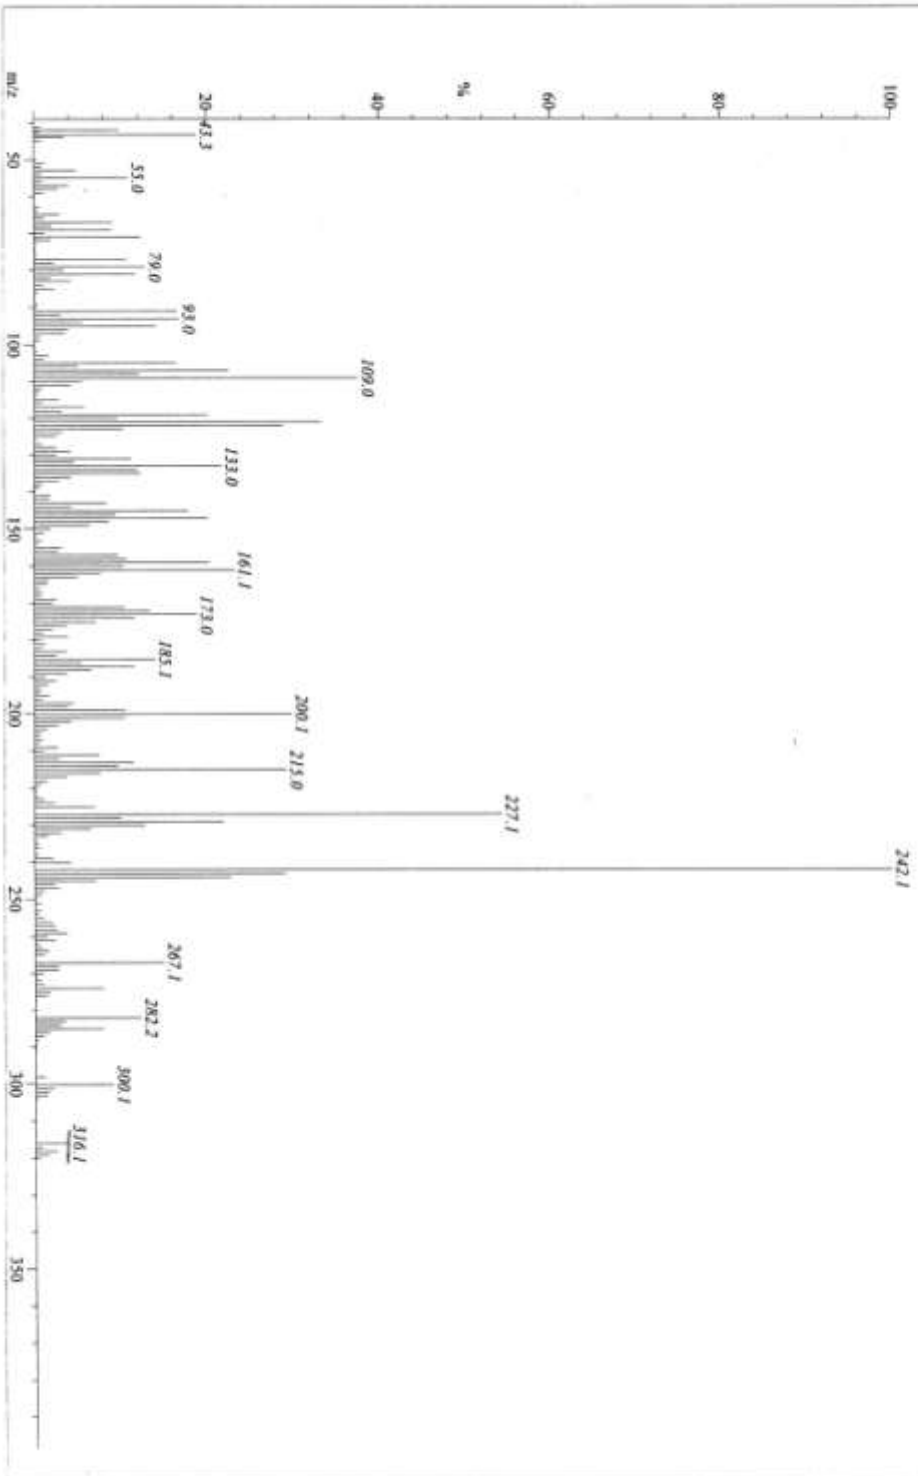

# Compound # 6

| Mass     | Relative Intensity | Theoretical Mass | Delta [ppm] | Delta [mm] | RDB  | Composition                                    |
|----------|--------------------|------------------|-------------|------------|------|------------------------------------------------|
| 277.2078 | 0.4                | 277.2015         | 22.6        | 6.3        | 0.5  | C <sub>14</sub> H <sub>18</sub> O <sub>2</sub> |
| 277.2827 | 0.7                | 277.2895         | -24.6       | -6.9       | 2.5  | C <sub>14</sub> H <sub>18</sub> O <sub>2</sub> |
| 278.1634 | 0.4                | 278.1671         | -13.3       | -3.7       | 10.0 | C <sub>14</sub> H <sub>18</sub> O <sub>2</sub> |
| 278.2216 | 0.2                | 278.2246         | -10.6       | -2.9       | 4.0  | C <sub>14</sub> H <sub>18</sub> O <sub>2</sub> |
| 279.2964 | 0.3                | 279.2974         | -3.5        | -1.0       | 2.0  | C <sub>14</sub> H <sub>18</sub> O <sub>2</sub> |
| 279.1622 | 0.8                | 279.1596         | 9.3         | 2.6        | 5.5  | C <sub>14</sub> H <sub>18</sub> O <sub>2</sub> |
| 279.2960 | 0.4                |                  |             |            |      |                                                |
| 280.1822 | 1.4                | 280.1827         | -1.8        | -0.5       | 9.0  | C <sub>14</sub> H <sub>18</sub> O <sub>2</sub> |
| 280.3147 | 0.4                | 280.3130         | 5.9         | 1.7        | 1.0  | C <sub>14</sub> H <sub>18</sub> O <sub>2</sub> |
| 281.0567 | 0.5                | 281.0603         | -12.5       | -3.5       | 16.5 | C <sub>14</sub> H <sub>18</sub> O <sub>2</sub> |
| 281.1941 | 1.6                | 281.1905         | 12.6        | 3.5        | 8.5  | C <sub>14</sub> H <sub>18</sub> O <sub>2</sub> |
| 281.3236 | 0.4                | 281.3208         | 3.8         | 2.8        | 0.5  | C <sub>14</sub> H <sub>18</sub> O <sub>2</sub> |
| 282.0753 | 0.3                | 282.0681         | 25.7        | 7.2        | 16.0 | C <sub>14</sub> H <sub>18</sub> O <sub>2</sub> |
| 282.1246 | 0.3                | 282.1256         | -3.6        | -1.0       | 10.0 | C <sub>14</sub> H <sub>18</sub> O <sub>2</sub> |
| 282.1993 | 51.7               | 282.1984         | 3.3         | 0.9        | 8.0  | C <sub>14</sub> H <sub>18</sub> O <sub>2</sub> |
| 283.2026 | 14.1               | 283.2062         | -12.6       | -3.6       | 7.5  | C <sub>14</sub> H <sub>18</sub> O <sub>2</sub> |
| 284.2136 | 11.8               | 284.2140         | -1.5        | -0.4       | 7.0  | C <sub>14</sub> H <sub>18</sub> O <sub>2</sub> |
| 285.1887 | 14.9               | 285.1855         | 11.3        | 3.2        | 7.5  | C <sub>14</sub> H <sub>18</sub> O <sub>2</sub> |
| 286.1921 | 5.0                | 286.1932         | -4.0        | -1.1       | 7.0  | C <sub>14</sub> H <sub>18</sub> O <sub>2</sub> |
| 287.1930 | 1.9                | 287.2011         | -21.1       | -6.1       | 6.5  | C <sub>14</sub> H <sub>18</sub> O <sub>2</sub> |
| 287.2700 | 0.7                | 287.2739         | -13.4       | -3.8       | 4.5  | C <sub>14</sub> H <sub>18</sub> O <sub>2</sub> |
| 288.2134 | 0.7                | 288.2089         | 13.5        | 4.5        | 6.0  | C <sub>14</sub> H <sub>18</sub> O <sub>2</sub> |
| 288.2761 | 0.4                | 288.2817         | -19.3       | -5.6       | 4.0  | C <sub>14</sub> H <sub>18</sub> O <sub>2</sub> |
| 289.1143 | 0.2                | 289.1229         | -22.8       | -6.6       | 12.5 | C <sub>14</sub> H <sub>18</sub> O <sub>2</sub> |
| 289.1076 |                    | 289.1076         | 29.9        | 8.7        | 8.5  | C <sub>14</sub> H <sub>18</sub> O <sub>2</sub> |
| 289.2929 | 0.5                | 289.2895         | 11.7        | 3.4        | 3.5  | C <sub>14</sub> H <sub>18</sub> O <sub>2</sub> |
| 290.2959 | 0.2                | 290.2974         | -5.0        | -1.5       | 3.0  | C <sub>14</sub> H <sub>18</sub> O <sub>2</sub> |
| 292.3198 | 0.2                | 292.3130         | 23.4        | 6.8        | 2.0  | C <sub>14</sub> H <sub>18</sub> O <sub>2</sub> |
| 293.3191 | 0.3                | 293.3208         | -6.0        | -1.8       | 1.5  | C <sub>14</sub> H <sub>18</sub> O <sub>2</sub> |
| 295.1050 | 0.2                | 295.1123         | -24.5       | -7.2       | 15.5 | C <sub>14</sub> H <sub>18</sub> O <sub>2</sub> |
| 295.0970 |                    | 295.0970         | 27.2        | 8.0        | 11.5 | C <sub>14</sub> H <sub>18</sub> O <sub>2</sub> |
| 296.1973 | 0.2                | 296.1988         | -5.0        | -1.5       | 4.0  | C <sub>14</sub> H <sub>18</sub> O <sub>2</sub> |
| 296.2075 | 0.2                | 296.2140         | -22.0       | -6.5       | 8.0  | C <sub>14</sub> H <sub>18</sub> O <sub>2</sub> |
| 296.1988 |                    | 296.1988         | 29.5        | 8.8        | 4.0  | C <sub>14</sub> H <sub>18</sub> O <sub>2</sub> |
| 298.1923 | 1.3                | 298.1933         | -3.4        | -1.0       | 8.0  | C <sub>14</sub> H <sub>18</sub> O <sub>2</sub> |
| 299.2046 | 0.5                | 299.2011         | 11.8        | 3.5        | 7.5  | C <sub>14</sub> H <sub>18</sub> O <sub>2</sub> |
| 299.2665 | 0.2                | 299.2739         | -24.5       | -7.3       | 5.5  | C <sub>14</sub> H <sub>18</sub> O <sub>2</sub> |
| 299.2586 |                    | 299.2586         | 26.4        | 7.9        | 1.5  | C <sub>14</sub> H <sub>18</sub> O <sub>2</sub> |
| 300.2098 | 10.0               | 300.2089         | 3.1         | 0.9        | 7.0  | C <sub>14</sub> H <sub>18</sub> O <sub>2</sub> |
| 301.2142 | 3.7                | 301.2168         | -8.4        | -2.5       | 6.5  | C <sub>14</sub> H <sub>18</sub> O <sub>2</sub> |
| 301.2827 | 0.4                | 301.2895         | -22.5       | -6.8       | 4.9  | C <sub>14</sub> H <sub>18</sub> O <sub>2</sub> |
| 301.2743 |                    | 301.2743         | 28.1        | 8.5        | 0.5  | C <sub>14</sub> H <sub>18</sub> O <sub>2</sub> |
| 302.2241 | 1.9                | 302.2246         | -1.5        | -0.4       | 6.0  | C <sub>14</sub> H <sub>18</sub> O <sub>2</sub> |
| 302.9723 | 0.3                |                  |             |            |      |                                                |
| 303.2044 | 0.9                | 303.2113         | -22.5       | -6.8       | 10.5 | C <sub>14</sub> H <sub>18</sub> O <sub>2</sub> |
| 303.1960 |                    | 303.1960         | 27.8        | 8.4        | 6.5  | C <sub>14</sub> H <sub>18</sub> O <sub>2</sub> |
| 303.2171 | 0.9                | 303.2171         | 0.0         | 0.0        | 1.5  | C <sub>14</sub> H <sub>18</sub> O <sub>2</sub> |
| 303.2113 |                    | 303.2113         | 19.4        | 5.9        | 10.5 | C <sub>14</sub> H <sub>18</sub> O <sub>2</sub> |
| 303.3034 | 0.3                | 303.3052         | -6.0        | -1.8       | 3.5  | C <sub>14</sub> H <sub>18</sub> O <sub>2</sub> |
| 304.1996 | 0.4                | 304.2038         | -14.0       | -4.3       | 6.0  | C <sub>14</sub> H <sub>18</sub> O <sub>2</sub> |
| 304.3142 | 0.2                | 304.3130         | 4.0         | 1.2        | 3.0  | C <sub>14</sub> H <sub>18</sub> O <sub>2</sub> |
| 305.3233 | 0.5                | 305.3208         | 8.0         | 2.4        | 2.9  | C <sub>14</sub> H <sub>18</sub> O <sub>2</sub> |
| 309.2359 | 0.2                | 309.2430         | -23.0       | -7.1       | 3.5  | C <sub>14</sub> H <sub>18</sub> O <sub>2</sub> |
| 309.2568 | 0.2                | 309.2592         | -4.5        | -1.4       | 7.5  | C <sub>14</sub> H <sub>18</sub> O <sub>2</sub> |
| 309.3567 | 0.3                | 309.3521         | 14.8        | 4.6        | 0.5  | C <sub>14</sub> H <sub>18</sub> O <sub>2</sub> |
| 313.2888 | 0.3                | 313.2895         | -2.3        | -0.7       | 5.5  | C <sub>14</sub> H <sub>18</sub> O <sub>2</sub> |
| 315.3099 | 0.4                | 315.3052         | 14.9        | 4.7        | 4.5  | C <sub>14</sub> H <sub>18</sub> O <sub>2</sub> |
| 316.2063 | 0.2                | 316.2038         | 7.7         | 2.4        | 7.0  | C <sub>14</sub> H <sub>18</sub> O <sub>2</sub> |
| 316.3027 | 0.3                | 316.2977         | 15.7        | 5.0        | 0.0  | C <sub>14</sub> H <sub>18</sub> O <sub>2</sub> |
| 317.2026 | 0.2                | 317.2117         | -28.5       | -9.0       | 6.5  | C <sub>14</sub> H <sub>18</sub> O <sub>2</sub> |
| 317.3164 | 0.6                | 317.3208         | -14.0       | -4.4       | 3.5  | C <sub>14</sub> H <sub>18</sub> O <sub>2</sub> |
| 317.9950 | 0.3                | 317.9953         | -1.0        | -0.3       | 21.0 | C <sub>14</sub> H <sub>18</sub> O <sub>2</sub> |
| 318.2238 | 1.6                | 318.2195         | 13.4        | 4.3        | 6.0  | C <sub>14</sub> H <sub>18</sub> O <sub>2</sub> |
| 318.3301 | 0.2                | 318.3287         | 4.6         | 1.4        | 3.0  | C <sub>14</sub> H <sub>18</sub> O <sub>2</sub> |
| 319.2245 | 1.0                | 319.2273         | -9.0        | -2.9       | 5.5  | C <sub>14</sub> H <sub>18</sub> O <sub>2</sub> |
| 319.3322 | 0.5                | 319.3365         | -13.3       | -4.3       | 2.5  | C <sub>14</sub> H <sub>18</sub> O <sub>2</sub> |
| 320.2360 | 0.4                | 320.2351         | 2.6         | 0.8        | 5.0  | C <sub>14</sub> H <sub>18</sub> O <sub>2</sub> |
| 320.3477 | 0.4                | 320.3443         | 10.6        | 3.4        | 2.0  | C <sub>14</sub> H <sub>18</sub> O <sub>2</sub> |
| 322.3619 | 0.3                | 322.3600         | 5.9         | 1.9        | 1.0  | C <sub>14</sub> H <sub>18</sub> O <sub>2</sub> |
| 327.3014 | 0.2                | 327.3052         | -11.5       | -3.8       | 5.5  | C <sub>14</sub> H <sub>18</sub> O <sub>2</sub> |

RABIA/DR.IQBAL/MES.I.F.34.1

1H

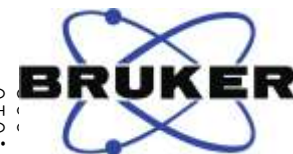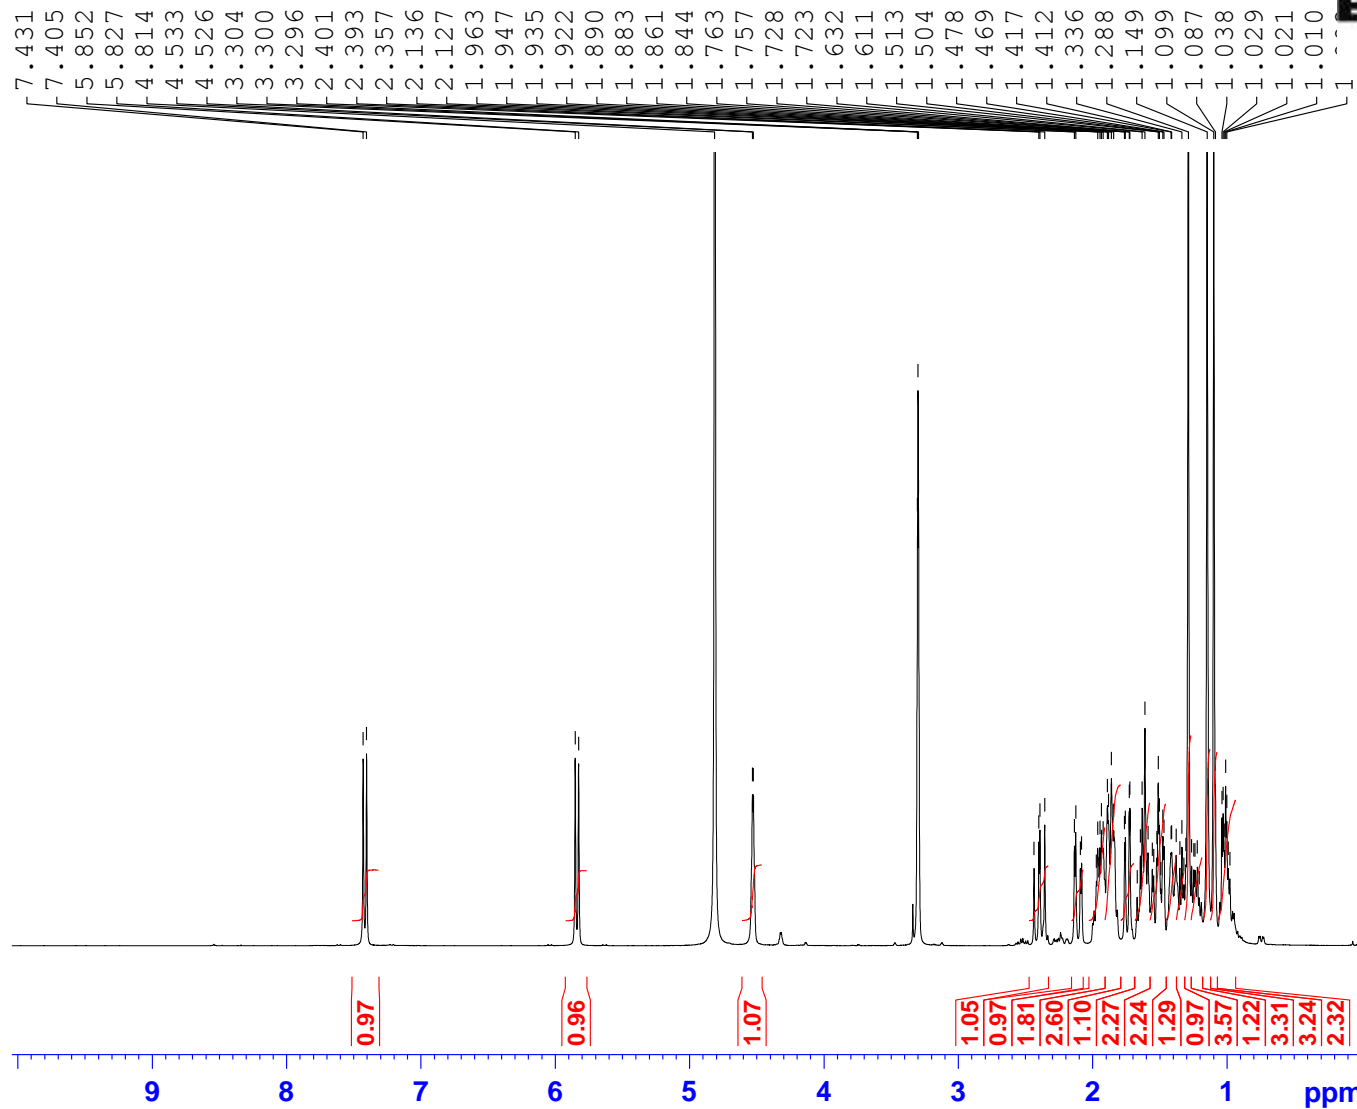

Current Data Parameters  
NAME compound 6  
EXPNO 4  
PROCNO 1

F2 - Acquisition Parameters  
Date\_ 20160422  
Time\_ 15.13  
INSTRUM spect  
PROBHD 5 mm SEI 1H-13  
PULPROG zg30  
TD 65536  
SOLVENT MeOD  
NS 128  
DS 0  
SWH 8012.820 Hz  
FIDRES 0.122266 Hz  
AQ 4.0894465 sec  
RG 90.5  
DW 62.400 usec  
DE 6.50 usec  
TE 300.0 K  
D1 2.00000000 sec  
TD0 1

==== CHANNEL f1 =====  
NUC1 1H  
P1 10.80 usec  
PL1 3.00 dB  
SFO1 400.0332002 MHz

F2 - Processing parameters  
SI 32768  
SF 400.0300087 MHz  
WDW EM  
SSB 0  
LB 0.30 Hz  
GB 0  
PC 0.20
