# Supplementary material for: Microbial transformation of mestanolone byMacrophomina phaseolinaandCunninghamella blakesleeanaand anticancer activities of the transformed products
Source: Royal Society of Chemistry journal article supplement (doi:10.1039/c8ra01309h), 2018-01-01
Supplement: c8ra01309h7.pdf [file c8ra01309h7.pdf]

Compound # 7

1/31/2014

Page 1

File: NH-ST-1  
Sample: NUSRAT HUSSAIN / DR IQBAL  
Instrument: JEOL JMS 600-H  
Inlet: My Inlet

Date Run: 01-31-2014 (Time Run: 09:10:58)

Ionization mode: EI+

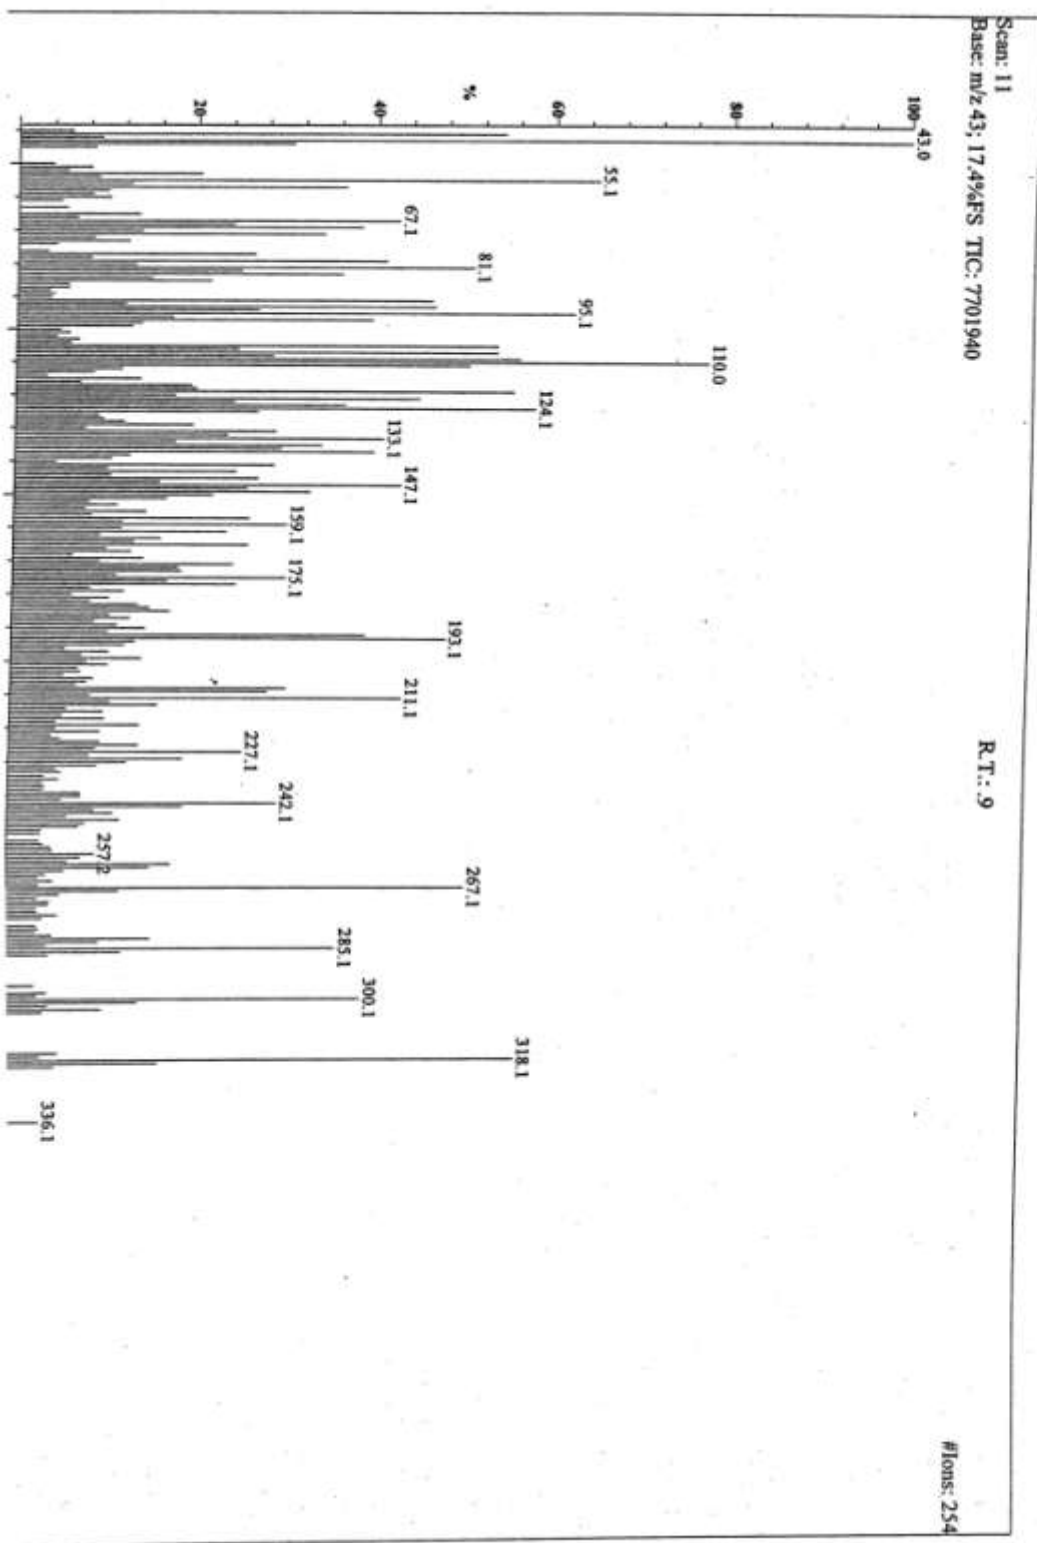

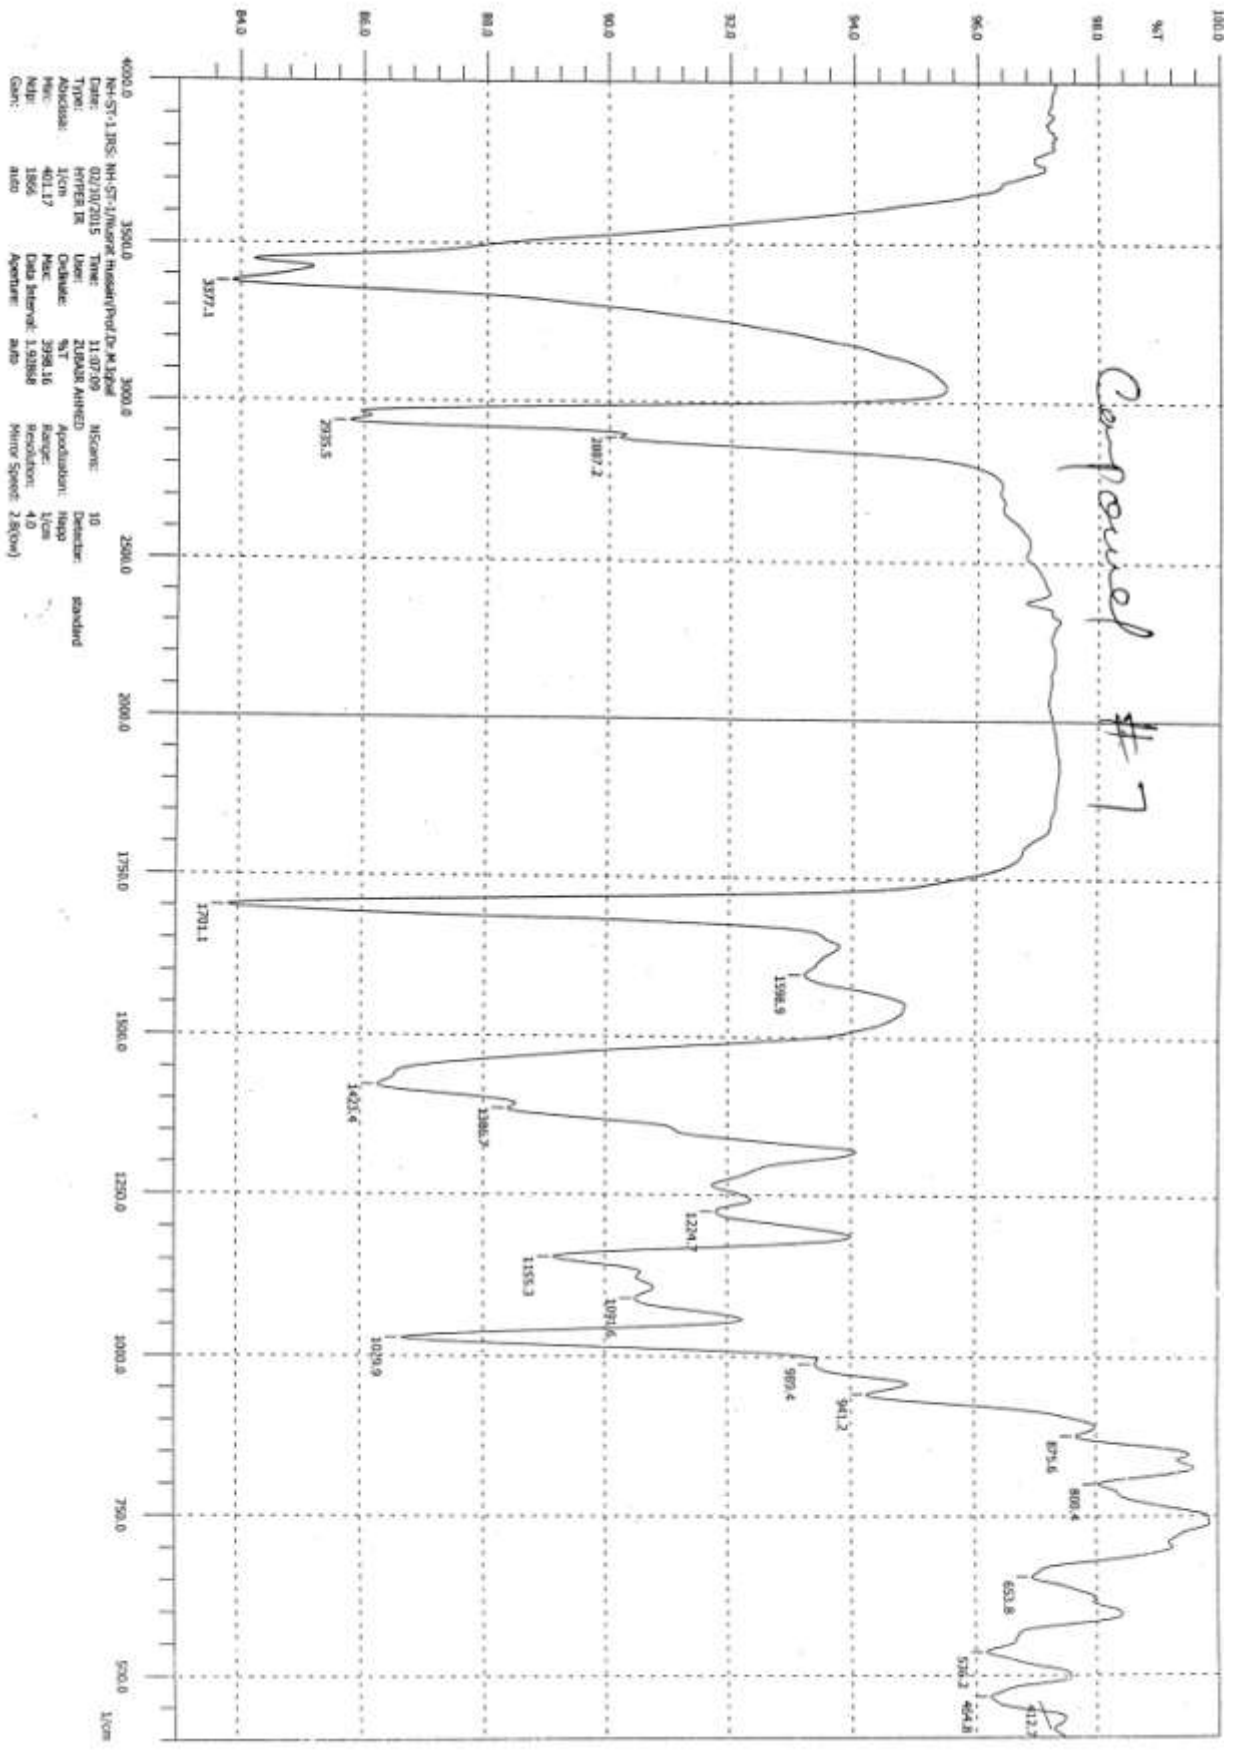

NH-ST-1-BIS: NH-ST-1/MSKPK/Hussain/Pvd/Dr M Sghal  
 Date: 02/10/2015 Time: 11:07:09 NScan: 10 Detector: standard  
 Type: HYPER TR User: ZUBAIR AHMED  
 Abscissa: 1/cm Objective: N/T Apodization: Happ  
 Mic: 40117 Mic: 399816 Range: 1/cm  
 Mpl: 1866 Data Interval: 150188 Resolution: 4.0  
 Gen: auto Aperture: auto Mirror Speed: 2.8(cm)

NUSRAT HUSSAIN/DR. IQBAL/NH-ST-1

1H

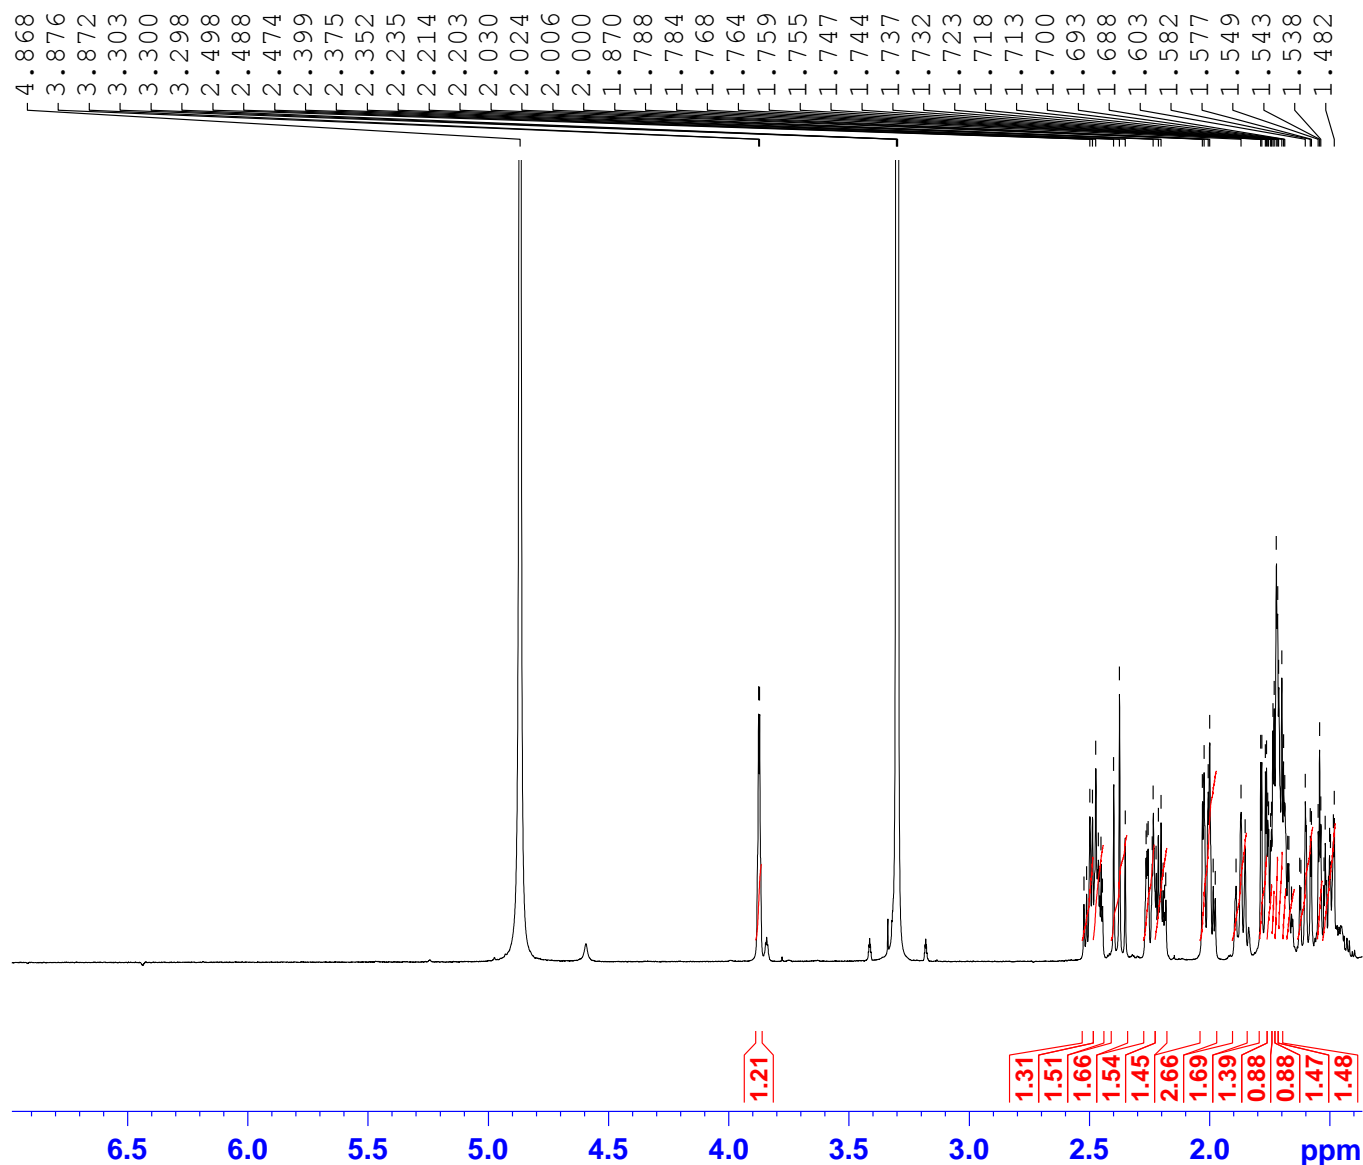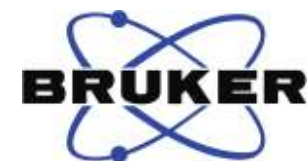

Current Data Parameters  
NAME compound 7  
EXPNO 1  
PROCNO 1

F2 - Acquisition Parameters  
Date\_ 20131218  
Time\_ 17.25  
INSTRUM spect  
PROBHD 5 mm CPTCI 1H-  
PULPROG zg30  
TD 32768  
SOLVENT MeOD  
NS 32  
DS 0  
SWH 9615.385 Hz  
FIDRES 0.293438 Hz  
AQ 1.7039360 sec  
RG 8  
DW 52.000 usec  
DE 6.50 usec  
TE 297.8 K  
D1 2.00000000 sec  
TD0 1

==== CHANNEL f1 =====  
NUC1 1H  
P1 8.00 usec  
PL1 3.31 dB  
PL1W 6.79873323 W  
SFO1 600.0345002 MHz

F2 - Processing parameters  
SI 32768  
SF 600.0300172 MHz  
WDW EM  
SSB 0  
LB 0.50 Hz  
GB 0  
PC 1.40

NUSRAT HUSSAIN/DR. IQBAL/NH-ST-1  
BB

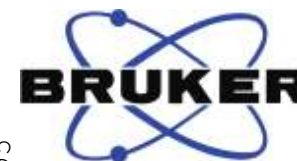

— 214.47

82.30  
79.31  
69.50  
49.42  
49.28  
49.14  
49.00  
48.86  
48.71  
48.57  
46.83  
45.03  
41.91  
40.79  
39.21  
38.73  
37.95  
34.95

Current Data Parameters  
NAME compound 7  
EXPNO 6  
PROCNO 1

F2 - Acquisition Parameters  
Date\_ 20131219  
Time\_ 8.32  
INSTRUM spect  
PROBHD 5 mm CPTCI 1H-  
PULPROG zgpg  
TD 32768  
SOLVENT MeOD  
NS 7314  
DS 4  
SWH 35971.223 Hz  
FIDRES 1.097755 Hz  
AQ 0.4554752 sec  
RG 32768  
DW 13.900 usec  
DE 6.50 usec  
TE 297.8 K  
D1 2.00000000 sec  
D11 0.03000000 sec  
TD0 12

==== CHANNEL f1 =====  
NUC1 13C  
P1 12.70 usec  
PL1 -1.81 dB  
PL1W 81.92915344 W  
SFO1 150.8950149 MHz

==== CHANNEL f2 =====  
CPDPRG[2] waltz16  
NUC2 1H  
PCPD2 80.00 usec  
PL2 3.31 dB  
PL12 23.31 dB  
PL13 22.50 dB  
PL2W 6.79873323 W  
PL12W 0.06798734 W  
PL13W 0.08192718 W  
SFO2 600.0336002 MHz

F2 - Processing parameters  
SI 16384  
SF 150.8774509 MHz  
WDW EM  
SSB 0  
LB 1.00 Hz  
GB 0  
GB 1.00

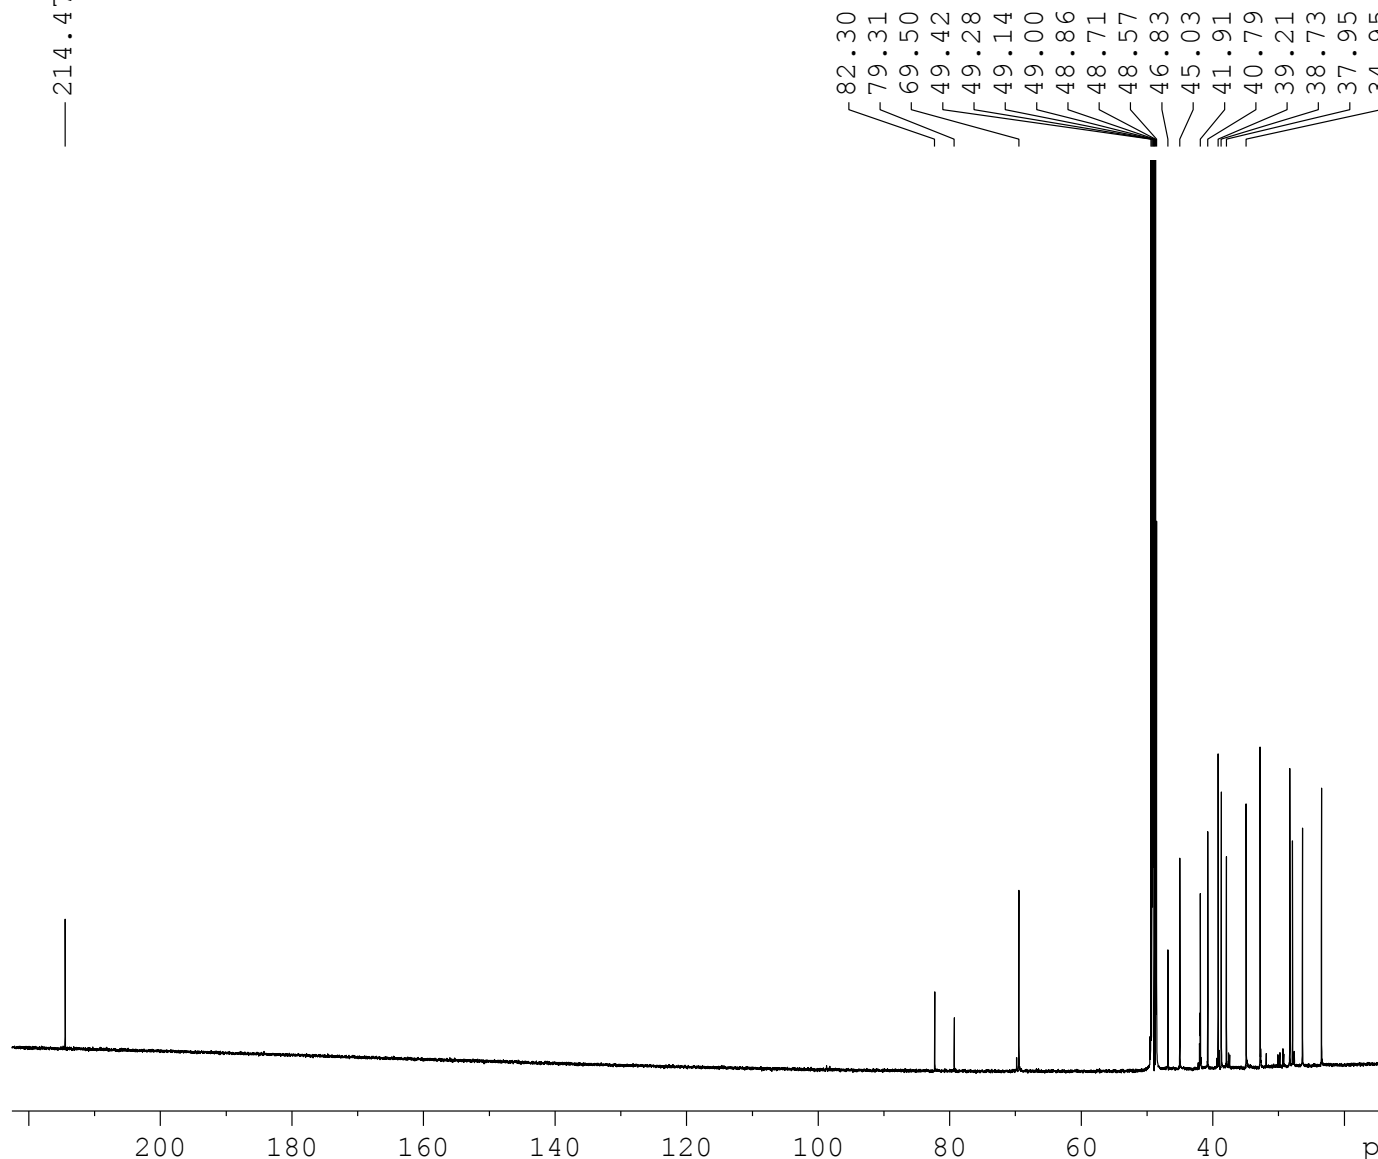

NUSRAT HUSSAIN/DR. IQBAL/NH-ST-1  
deptsp135

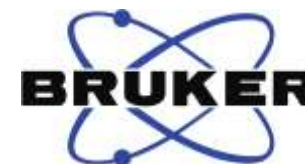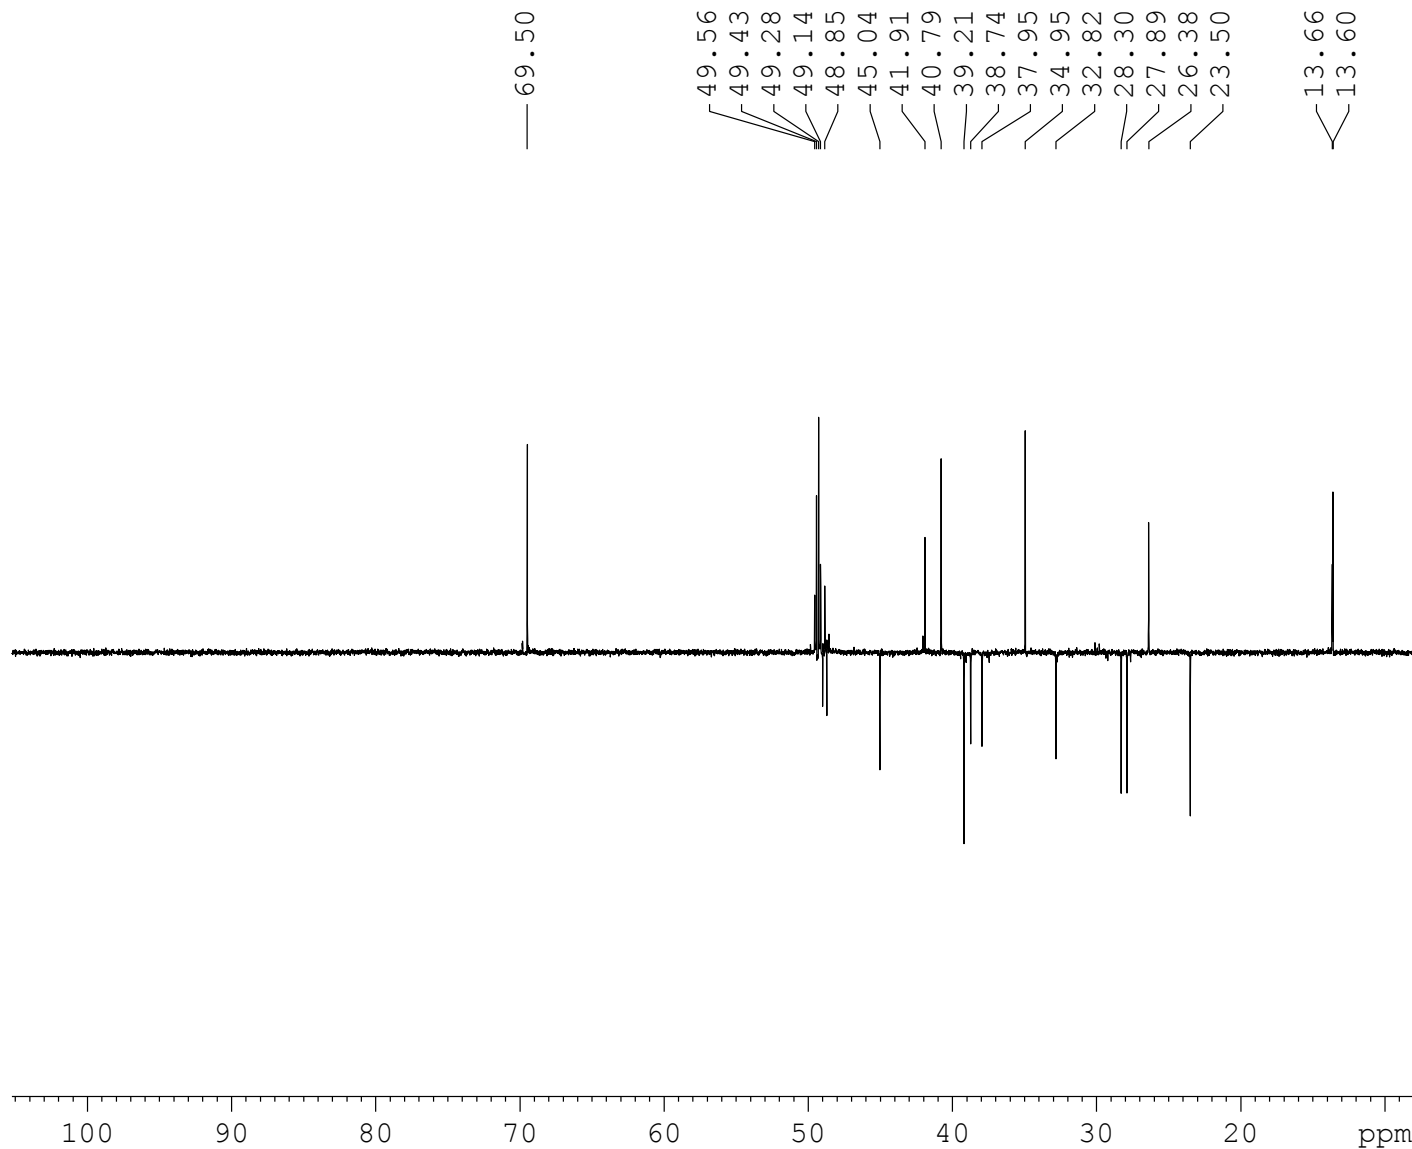

Current Data Parameters  
NAME compound 7  
EXPNO 7  
PROCNO 1

F2 - Acquisition Parameters  
Date\_ 20131219  
Time\_ 13.03  
INSTRUM spect  
PROBHD 5 mm CPTCI 1H-  
PULPROG deptsp135  
TD 32768  
SOLVENT MeOD  
NS 823  
DS 2  
SWH 30303.031 Hz  
FIDRES 0.924775 Hz  
AQ 0.5406720 sec  
RG 32768  
DW 16.500 usec  
DE 6.50 usec  
TE 298.1 K  
CNST2 145.0000000  
D1 1.50000000 sec  
D2 0.00344828 sec  
D12 0.00002000 sec  
TDO 6

===== CHANNEL f1 =====  
NUC1 13C  
P1 12.70 usec  
P12 2000.00 usec  
PL0 120.00 dB  
PL1 -1.81 dB  
PL0W 0 W  
PL1W 81.92915344 W  
SFO1 150.8927518 MHz  
SP2 4.19 dB  
SPNAM[2] Crp60comp.4  
SPOAL2 0.500  
SPOFFS2 0 Hz

===== CHANNEL f2 =====  
CPDPRG[2] waltz16  
NUC2 1H  
P3 8.00 usec  
P4 16.00 usec  
PCPD2 80.00 usec  
PL2 3.31 dB  
PL12 23.31 dB  
PL2W 6.79873323 W  
PL12W 0.06798734 W  
SFO2 600.0330002 MHz

F2 - Processing parameters  
SI 16384  
SF 150.8774509 MHz  
WDW EM  
SSB 0  
LB 0.50 Hz  
GB 0  
PC 1.40

NUSRAT HUSSAIN/DR. IQBAL/NH-ST-1  
deptsp 90

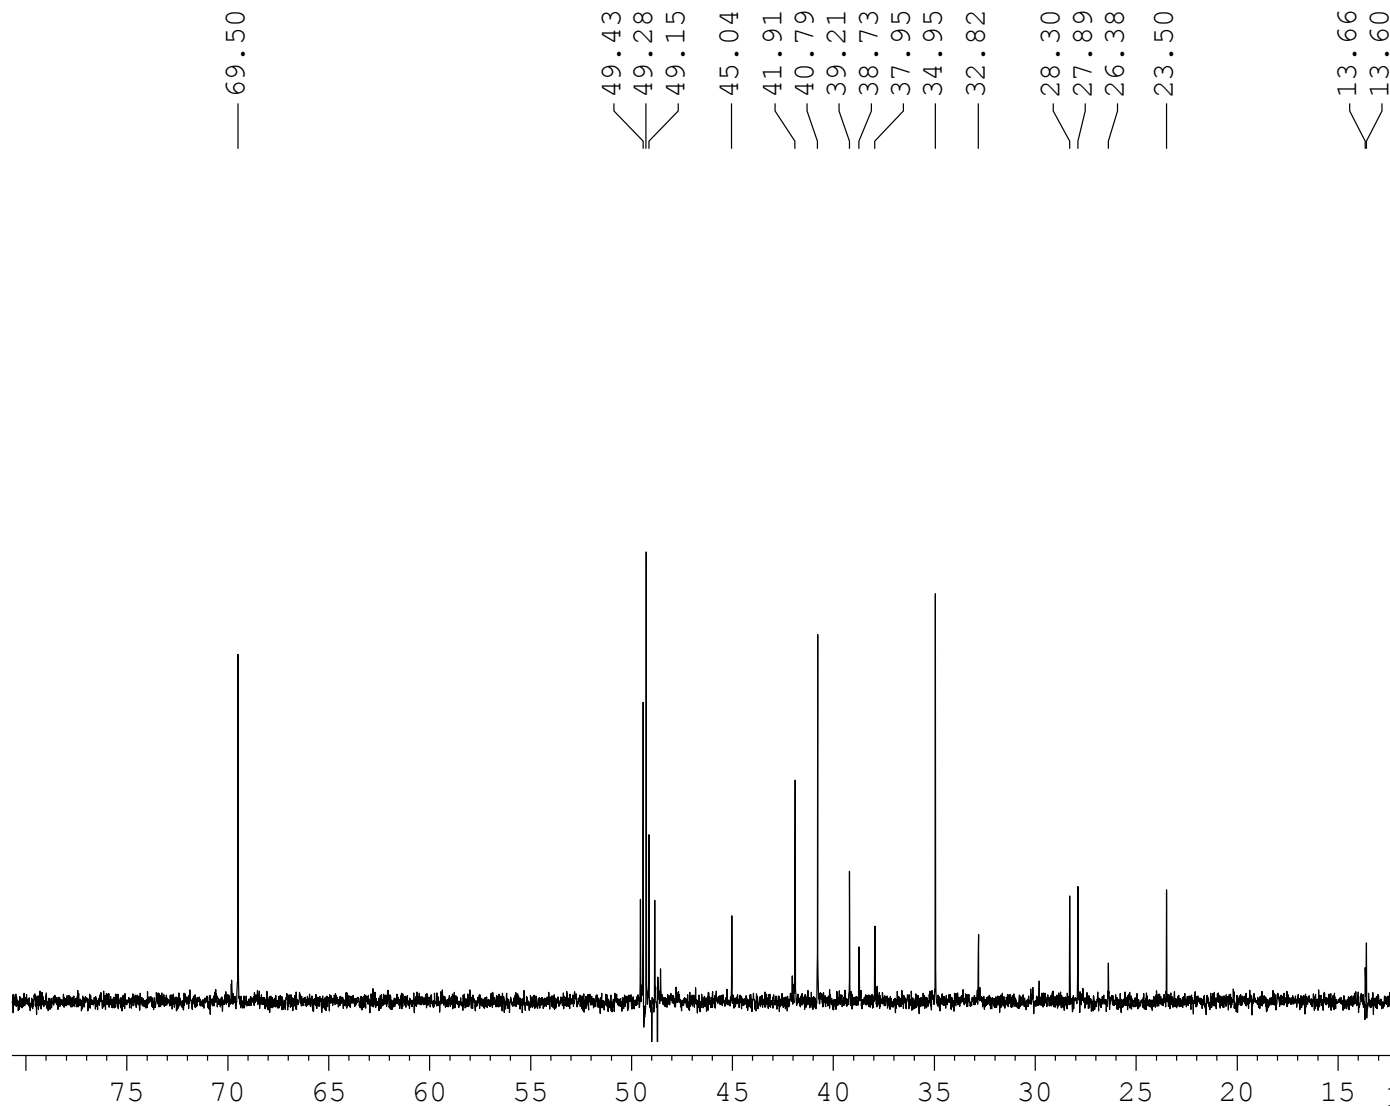

Current Data Parameters  
NAME compound 7  
EXPNO 8  
PROCNO 1

F2 - Acquisition Parameters  
Date\_ 20131219  
Time\_ 13.33  
INSTRUM spect  
PROBHD 5 mm CPTCI 1H-  
PULPROG deptsp90  
TD 32768  
SOLVENT MeOD  
NS 240  
DS 2  
SWH 30303.031 Hz  
FIDRES 0.924775 Hz  
AQ 0.5406720 sec  
RG 32768  
DW 16.500 usec  
DE 6.50 usec  
TE 298.1 K  
CNST2 145.0000000  
D1 1.50000000 sec  
D2 0.00344828 sec  
D12 0.00002000 sec  
TDO 4

===== CHANNEL f1 =====  
NUC1 13C  
P1 12.70 usec  
P12 2000.00 usec  
PL0 120.00 dB  
PL1 -1.81 dB  
PL0W 0 W  
PL1W 81.92915344 W  
SFO1 150.8927518 MHz  
SP2 4.19 dB  
SPNAM[2] Crp60comp.4  
SPOAL2 0.500  
SPOFFS2 0 Hz

===== CHANNEL f2 =====  
CPDPRG[2] waltz16  
NUC2 1H  
P3 8.00 usec  
P4 16.00 usec  
PCPD2 80.00 usec  
PL2 3.31 dB  
PL12 23.31 dB  
PL2W 6.79873323 W  
PL12W 0.06798734 W  
SFO2 600.0330002 MHz

F2 - Processing parameters  
SI 16384  
SF 150.8774509 MHz  
WDW EM  
SSB 0  
LB 0.50 Hz  
GB 0  
CB 1.40

NUSRAT HUSSAIN/DR. IQBAL/NH-ST-1  
hsqc

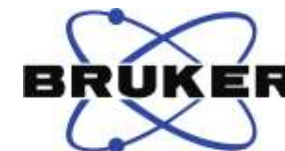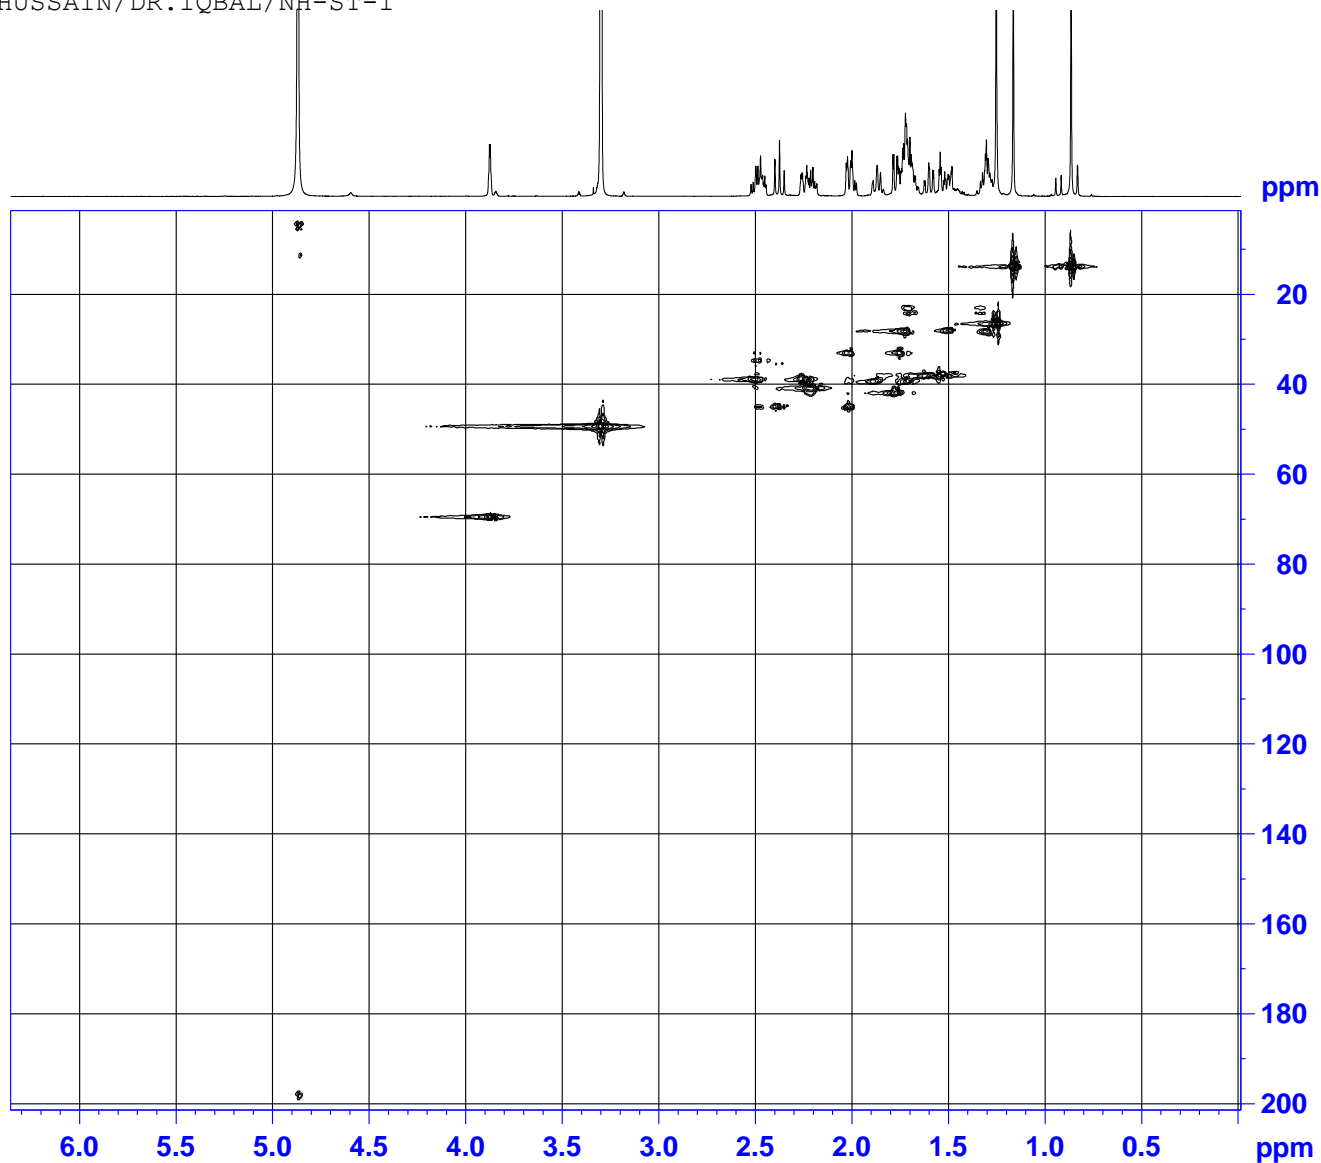

```
Current Data Parameters
NAME      compound 7
EXPNO    4
PROCNO   1

F2 - Acquisition Parameters
Date_    20131218
Time     21.38
INSTRUM  spect
PROBHD   5 mm CPTCI 1H-
PULPROG  hsqcetpsi
TD        1024
SOLVENT  MeOD
NS        32
DS         8
SWH       3822.630 Hz
FIDRES    3.733037 Hz
AQ         0.1339392 sec
RG         41285.1
DW         130.800 usec
DE          6.50 usec
TE         298.2 K
CNST2     145.0000000
D0          0.0000300 sec
D1          2.0000000 sec
D4          0.00172414 sec
D11         0.03000000 sec
D13         0.00000400 sec
D16         0.00020000 sec
D24         0.00110000 sec
IN0        0.00001655 sec
ZGOPTNS

===== CHANNEL f1 =====
NUC1       1H
P1         8.00 usec
P2         16.00 usec
P28        1000.00 usec
PL1         3.31 dB
PL1W       6.79873323 W
SFO1       600.0319201 MHz

===== CHANNEL f2 =====
CPDPRG[2]  garp
NUC2       13C
P3         11.50 usec
P4         23.00 usec
PCPD2      55.00 usec
PL2        -1.81 dB
PL12       11.70 dB
PL2W       81.92915344 W
PL12W      3.65122390 W
SFO2       150.8927518 MHz

===== GRADIENT CHANNEL =====
GPNAM[1]   SINE.100
GPNAM[2]   SINE.100
GPZ1       80.00 %
GPZ2       20.10 %
P16        1000.00 usec

F1 - Acquisition parameters
TD         256
SFO1       150.8928 MHz
FIDRES     235.769928 Hz
SW         200.000 ppm
FnMODE     Echo-Antiecho

F2 - Processing parameters
SI         1024
SF         600.0300172 MHz
WDW        QSINE
SSB        2
LB         0 Hz
GB         0
PC         4.00

F1 - Processing parameters
SI         1024
MC2        echo-antiecho
SF         150.8774509 MHz
WDW        QSINE
SSB        2
LB         0 Hz
GB         0
```

NUSRAT HUSSAIN/DR. IQBAL/NH-ST-1  
hmbc

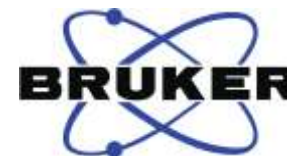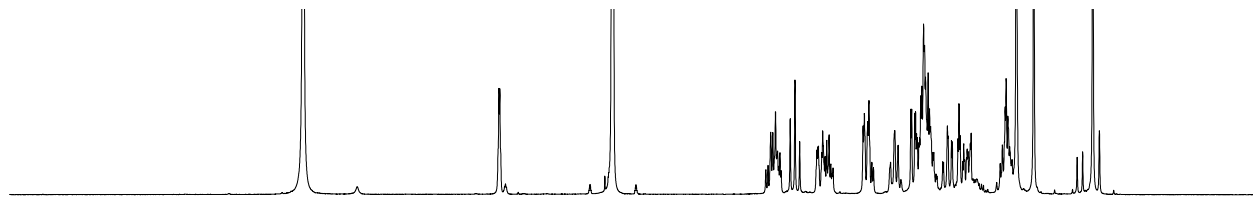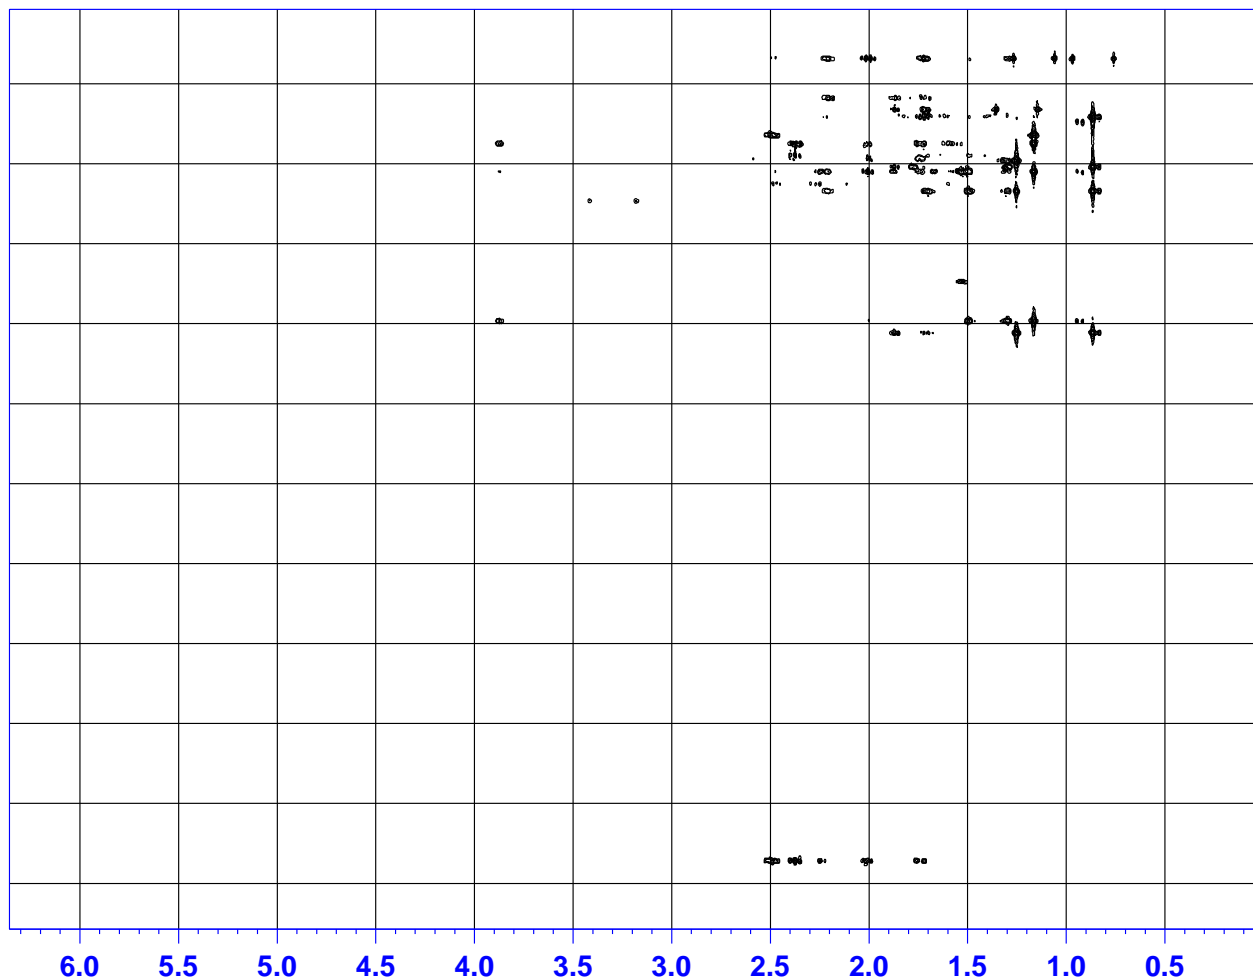

Current Data Parameters  
NAME compound 7  
EXPNO 5  
PROCNO 1

**ppm**

F2 - Acquisition Parameters  
Date\_ 20131219  
Time 2.33  
INSTRUM spect  
PROBHD 5 mm CPTCI 1H-  
PULPROG hmbcgp1pndqf  
TD 2048  
SOLVENT MeOD  
NS 32  
DS 16  
SWH 3822.630 Hz  
FIDRES 1.866518 Hz  
AQ 0.2678784 sec  
RG 41285.1  
DW 130.800 usec  
DE 6.50 usec  
TE 297.8 K  
CNST2 145.0000000  
CNST3 13.0000000  
D0 0.00000300 sec  
D1 2.00000000 sec  
D2 0.00344828 sec  
D6 0.03846154 sec  
D16 0.00015000 sec  
INO 0.00001440 sec

===== CHANNEL f1 =====  
NUC1 1H  
P1 8.00 usec  
P2 16.00 usec  
PL1 3.31 dB  
PL1W 6.79873323 W  
SFO1 600.0319201 MHz

===== CHANNEL f2 =====  
NUC2 13C  
P3 11.50 usec  
PL2 -1.81 dB  
PL2W 81.92915344 W  
SFO2 150.8950149 MHz

===== GRADIENT CHANNEL =====  
GPNAM[1] SINE.100  
GPNAM[2] SINE.100  
GPNAM[3] SINE.100  
GPZ1 50.00 %  
GPZ2 30.00 %  
GPZ3 40.10 %  
P16 2000.00 usec

F1 - Acquisition parameters  
TD 256  
SFO1 150.895 MHz  
FIDRES 271.139465 Hz  
SW 230.000 ppm  
FhMODE QF

F2 - Processing parameters  
SI 2048  
SF 600.0300172 MHz  
WDW SINE  
SSB 2  
LB 0 Hz  
GB 0  
PC 4.00

F1 - Processing parameters  
SI 1024  
MC2 QF  
SF 150.8774509 MHz  
WDW SINE  
SSB 2  
LB 0 Hz  
GB 0



NUSRAT HUSSAIN/DR. IQBAL/NH-ST-1  
cosy

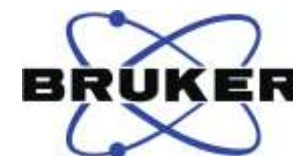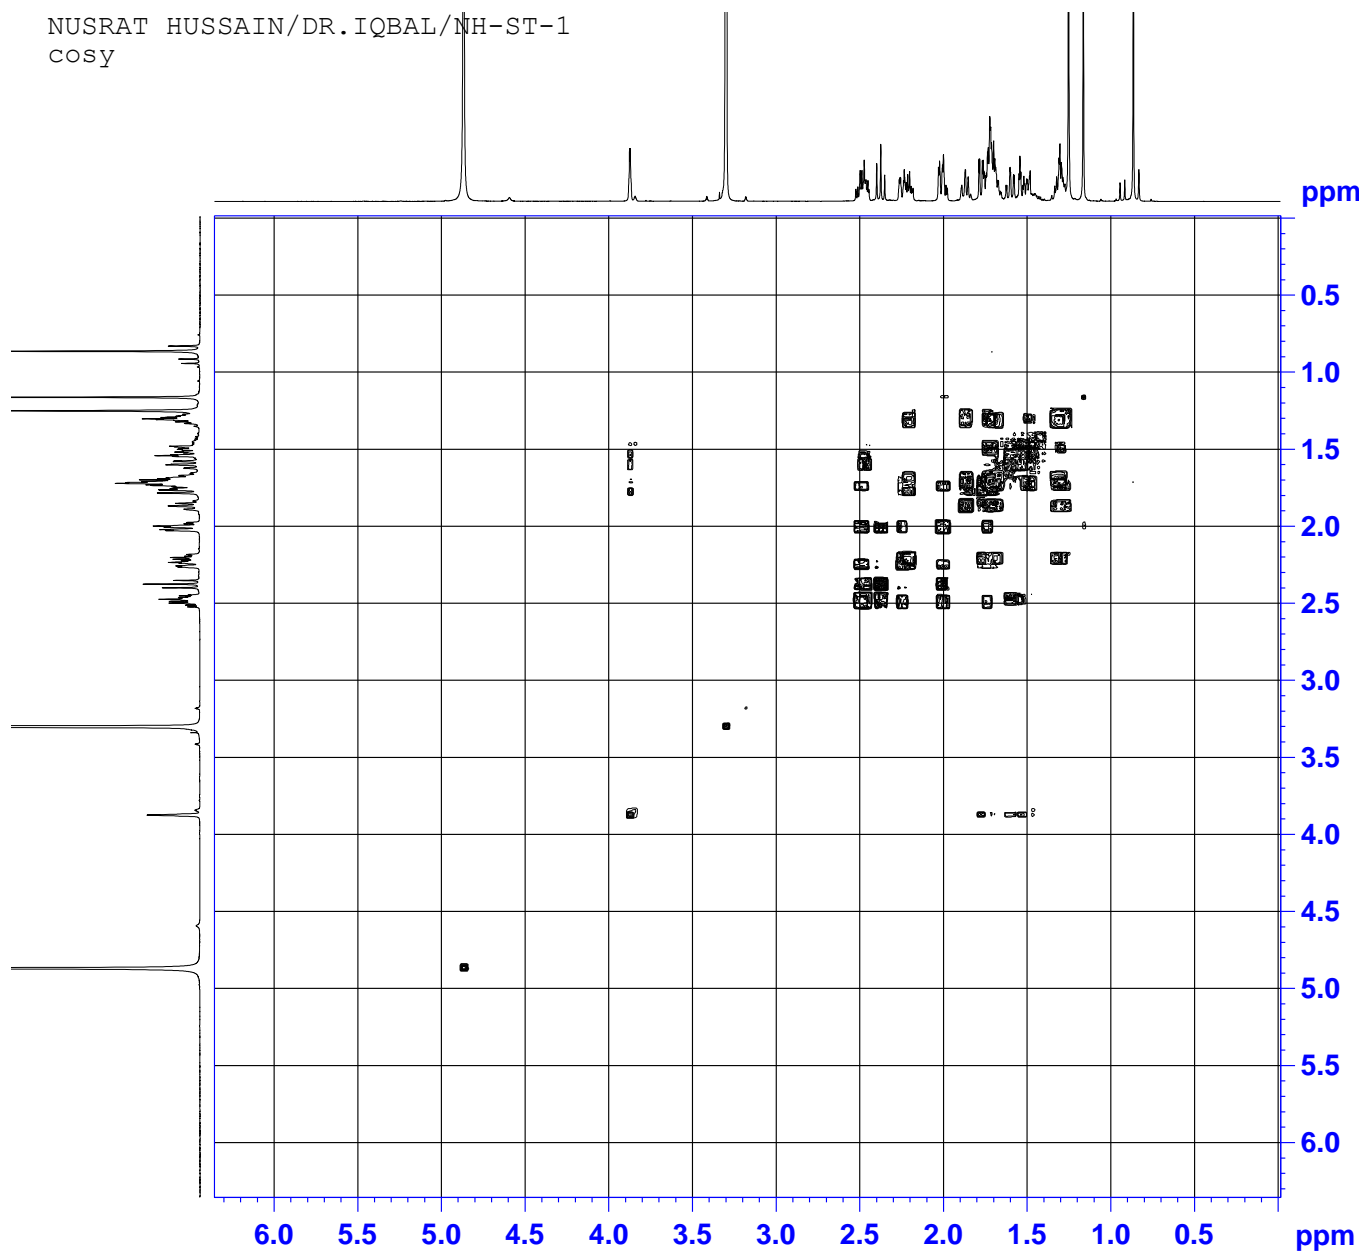

Current Data Parameters  
NAME compound 7  
EXPNO 2  
PROCNO 1

F2 - Acquisition Parameters  
Date\_ 20131218  
Time\_ 17.26  
INSTRUM spect  
PROBHD 5 mm CPTCI 1H-  
PULPROG cosydfqf  
TD 2048  
SOLVENT MeOD  
NS 8  
DS 4  
SWH 3822.630 Hz  
FIDRES 1.866518 Hz  
AQ 0.2678784 sec  
RG 14.3  
DW 130.800 usec  
DE 6.50 usec  
TE 297.9 K  
DO 0.00000300 sec  
D1 2.00000000 sec  
D13 0.00000400 sec  
D20 0.00000200 sec  
INO 0.00026160 sec

==== CHANNEL f1 =====  
NUC1 1H  
P1 8.00 usec  
PL1 3.31 dB  
PL1W 6.79873323 W  
SFO1 600.0319201 MHz

F1 - Acquisition parameters  
TD 128  
SFO1 600.0319 MHz  
FIDRES 59.728516 Hz  
SW 6.371 ppm  
FnMODE QF

F2 - Processing parameters  
SI 1024  
SF 600.0300172 MHz  
WDW QSINE  
SSB 0  
LB 0 Hz  
GB 0  
PC 4.00

F1 - Processing parameters  
SI 1024  
MC2 QF  
SF 600.0300172 MHz  
WDW QSINE  
SSB 0  
LB 0 Hz  
GB 0

NUSRAT HUSSAIN/DR. IQBAL/NH-ST-1  
noesy

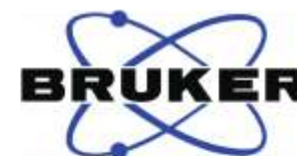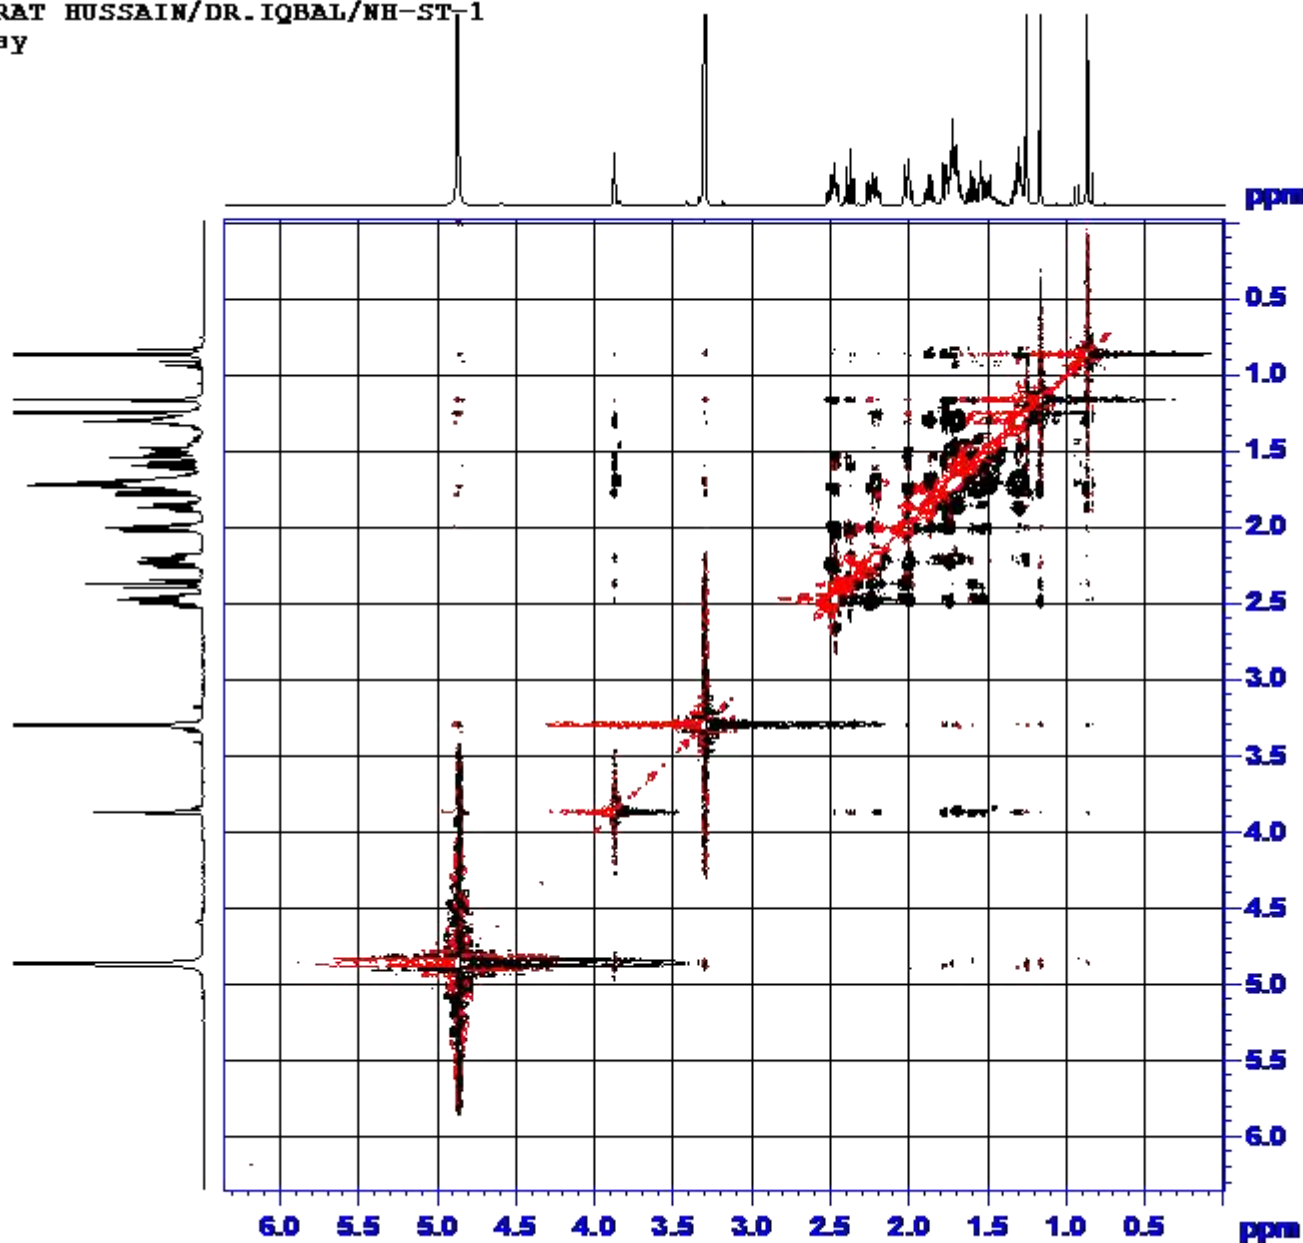

```

Current Data Parameters
NAME      compound 7
EXPNO    3
PROCNO   1

F2 - Acquisition Parameters
Date_    20131218
Time     18.06
CNSYRM   spect
PROBHD   5 mm CPXI 1B-
PULPROG  noesypph
TD        2048
SOLVENT  MeOD
NS        16
DS         4
SFO      3822.630 Hz
FIDRES   1.866518 Hz
AQ        0.2678784 sec
RG         16
DM        130.800 cmec
DE         6.50 cmec
TE        298.2 K
DQ        0.00012061 sec
DL        2.00000000 sec
DS        0.80000001 sec
DL6       0.00020000 sec
DB0       0.00026160 sec

----- CHANNEL f1 -----
NUC1      1H
P1         8.00 cmec
P2        16.00 cmec
P3         3.31 dB
P4LM      6.79873323 W
SFO1      600.0319201 MHz

----- CHANNEL CHANNEL -----
CPDPRM[1]  SINE 1.00
CPDPRM[2]  SINE 1.00
PCPD1      40.00 W
PCPD2     -40.00 W
PL6        1000.00 cmec

F1 - Acquisition parameters
TD         256
SFO1      600.0319 MHz
FIDRES    29.864296 Hz
SR         6.371 ppm
PQMODE    States-TEFI

F2 - Processing parameters
SI         1024
SF        600.0300172 MHz
NUC1      SINE
SSB        2
GB         0 Hz
CB         0
PC         4.00

F1 - Processing parameters
SI         512
NUC2      States-TEFI
SF        600.0300172 MHz
NUC1      SINE
SSB        2
GB         0 Hz
CB         0
  
```

Rabia / Dr. Iqbal / NH-ST-1 / C3D6O  
NOESY

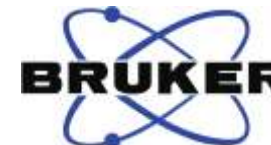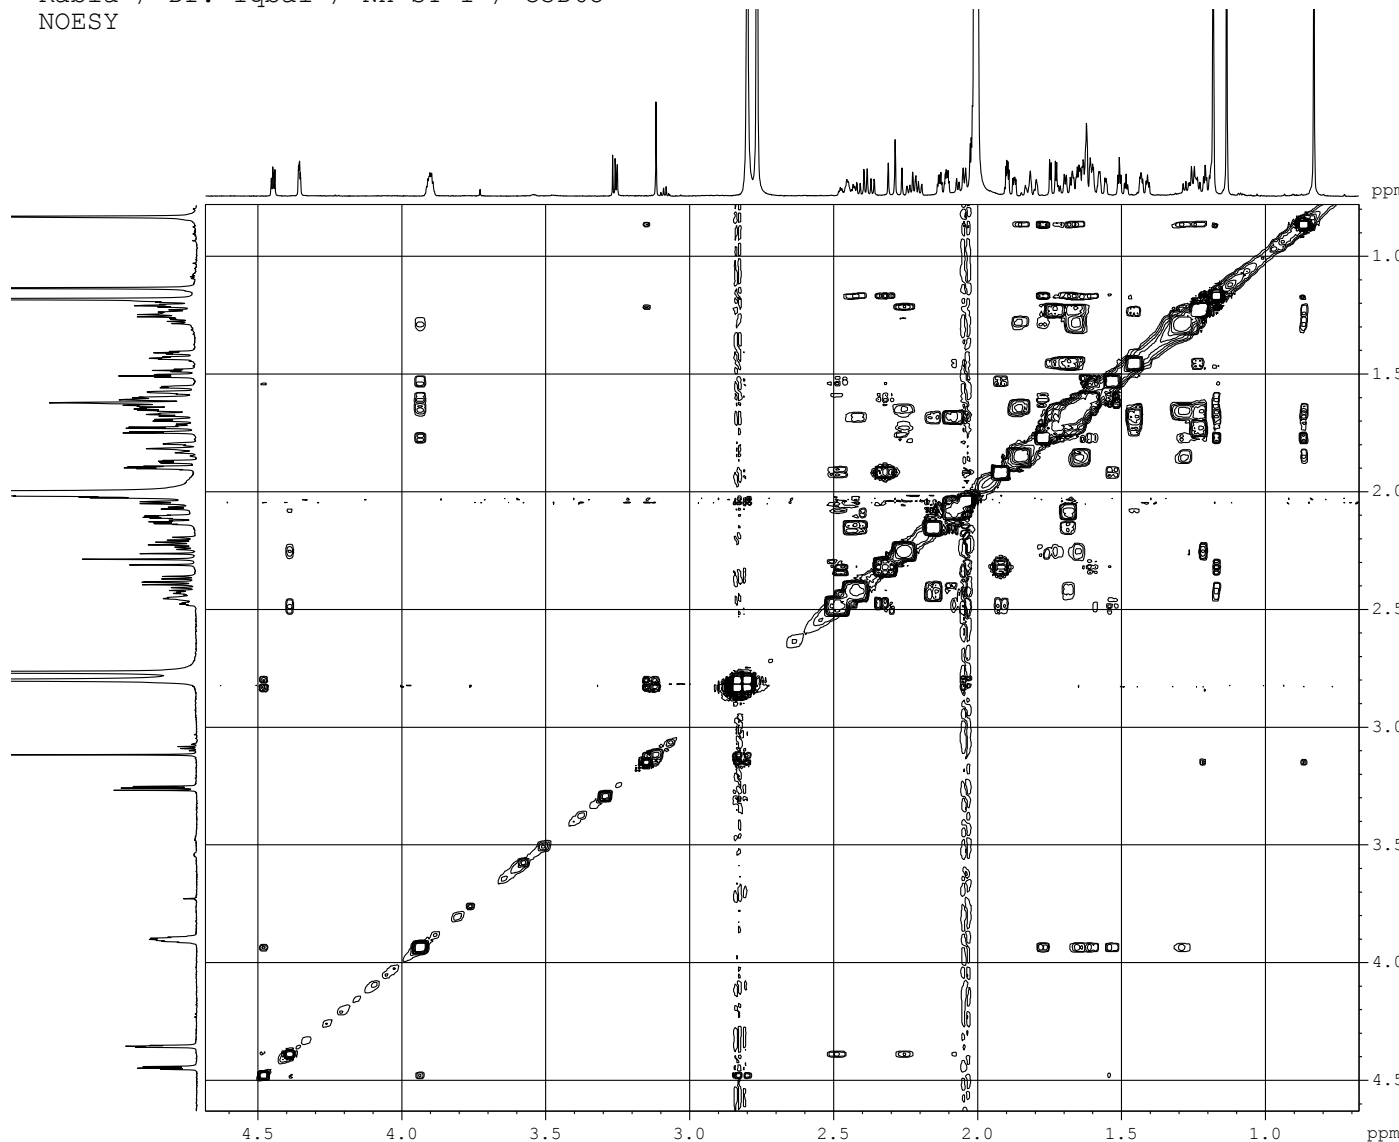

Curre...  
NAME COMP1  
EXPNO 3  
PROCNO 1

F2 - Acquisition Parameters  
Date\_ 20180314  
Time\_ 17.40  
INSTRUM spect  
PROBHD 5 mm PATXI 1H/  
PULPROG noesygpph  
TD 1024  
SOLVENT Acetone  
NS 32  
DS 16  
SWH 3591.954 Hz  
FIDRES 3.507768 Hz  
AQ 0.1425408 sec  
RG 456.1  
DW 139.200 usec  
DE 6.50 usec  
TE 274.3 K  
D0 0.00012998 sec  
D1 1.50000000 sec  
D8 0.80000001 sec  
D16 0.00015000 sec  
INO 0.00027840 sec

===== CHANNEL f1 =====  
NUC1 1H  
P1 7.24 usec  
P2 14.48 usec  
PL1 0 dB  
PL1W 19.59271431 W  
SF01 600.2318007 MHz

===== GRADIENT CHANNEL =====  
GPNAM[1] SINE.100  
GPNAM[2] SINE.100  
GPZ1 40.00 %  
GPZ2 -40.00 %  
P16 1500.00 usec

F1 - Acquisition parameters  
TD 256  
SF01 600.2318 MHz  
FIDRES 28.062141 Hz  
SW 5.984 ppm  
FnMODE States-TPPI

F2 - Processing parameters  
SI 1024  
SF 600.2300139 MHz  
WDW QSINE  
SSB 2  
LB 0 Hz  
GB 0  
PC 1.40

F1 - Processing parameters  
SI 1024  
MC2 States-TPPI  
SF 600.2300139 MHz  
WDW QSINE  
SSB 2  
LB 0 Hz  
GB 0
