# Supplementary material for: Microbial transformation of mestanolone byMacrophomina phaseolinaandCunninghamella blakesleeanaand anticancer activities of the transformed products
Source: Royal Society of Chemistry journal article supplement (doi:10.1039/c8ra01309h), 2018-01-01
Supplement: c8ra01309h8.pdf [file c8ra01309h8.pdf]

File: NH-ST-4  
Sample: MUSRAT HUSSAIN / DR IQBAL  
Instrument: JEOL JMS 600-H  
Inlet: My Inlet

Date Run: 01-31-2014 (Time Run: 09:20:31)

Ionization mode: EI+

Scan: 12  
Base: m/z 174; 99.99%FS TIC: 28305448

R.T.: 98

*Compound # 8*

#Ions: 316

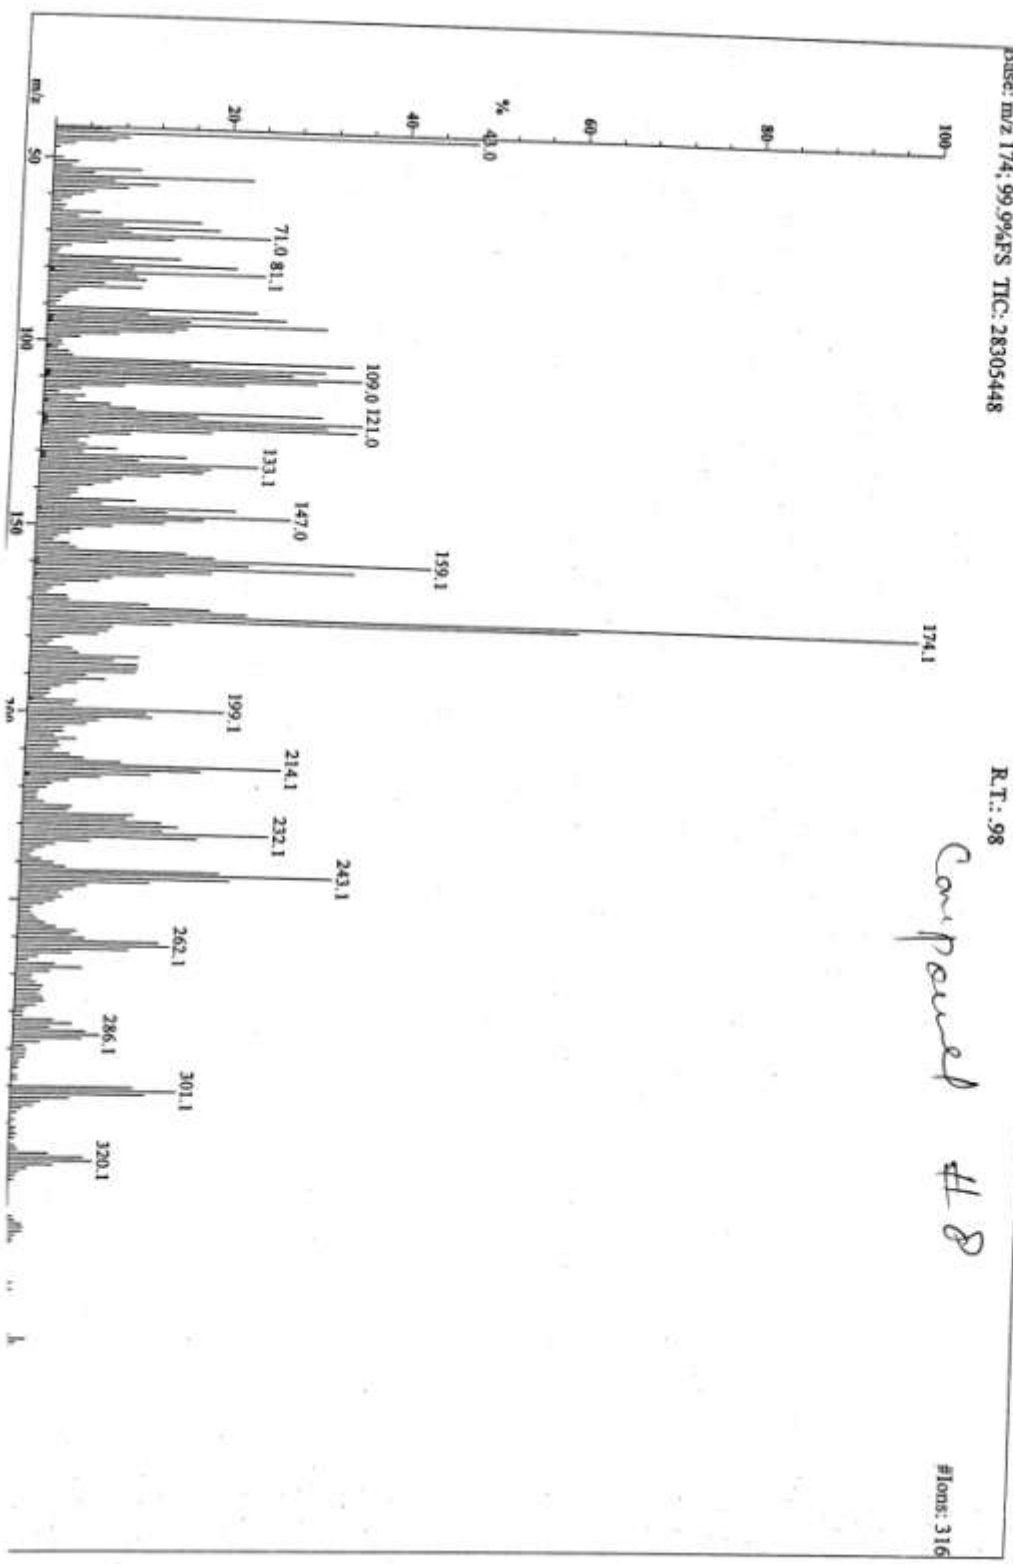

Compound # 8

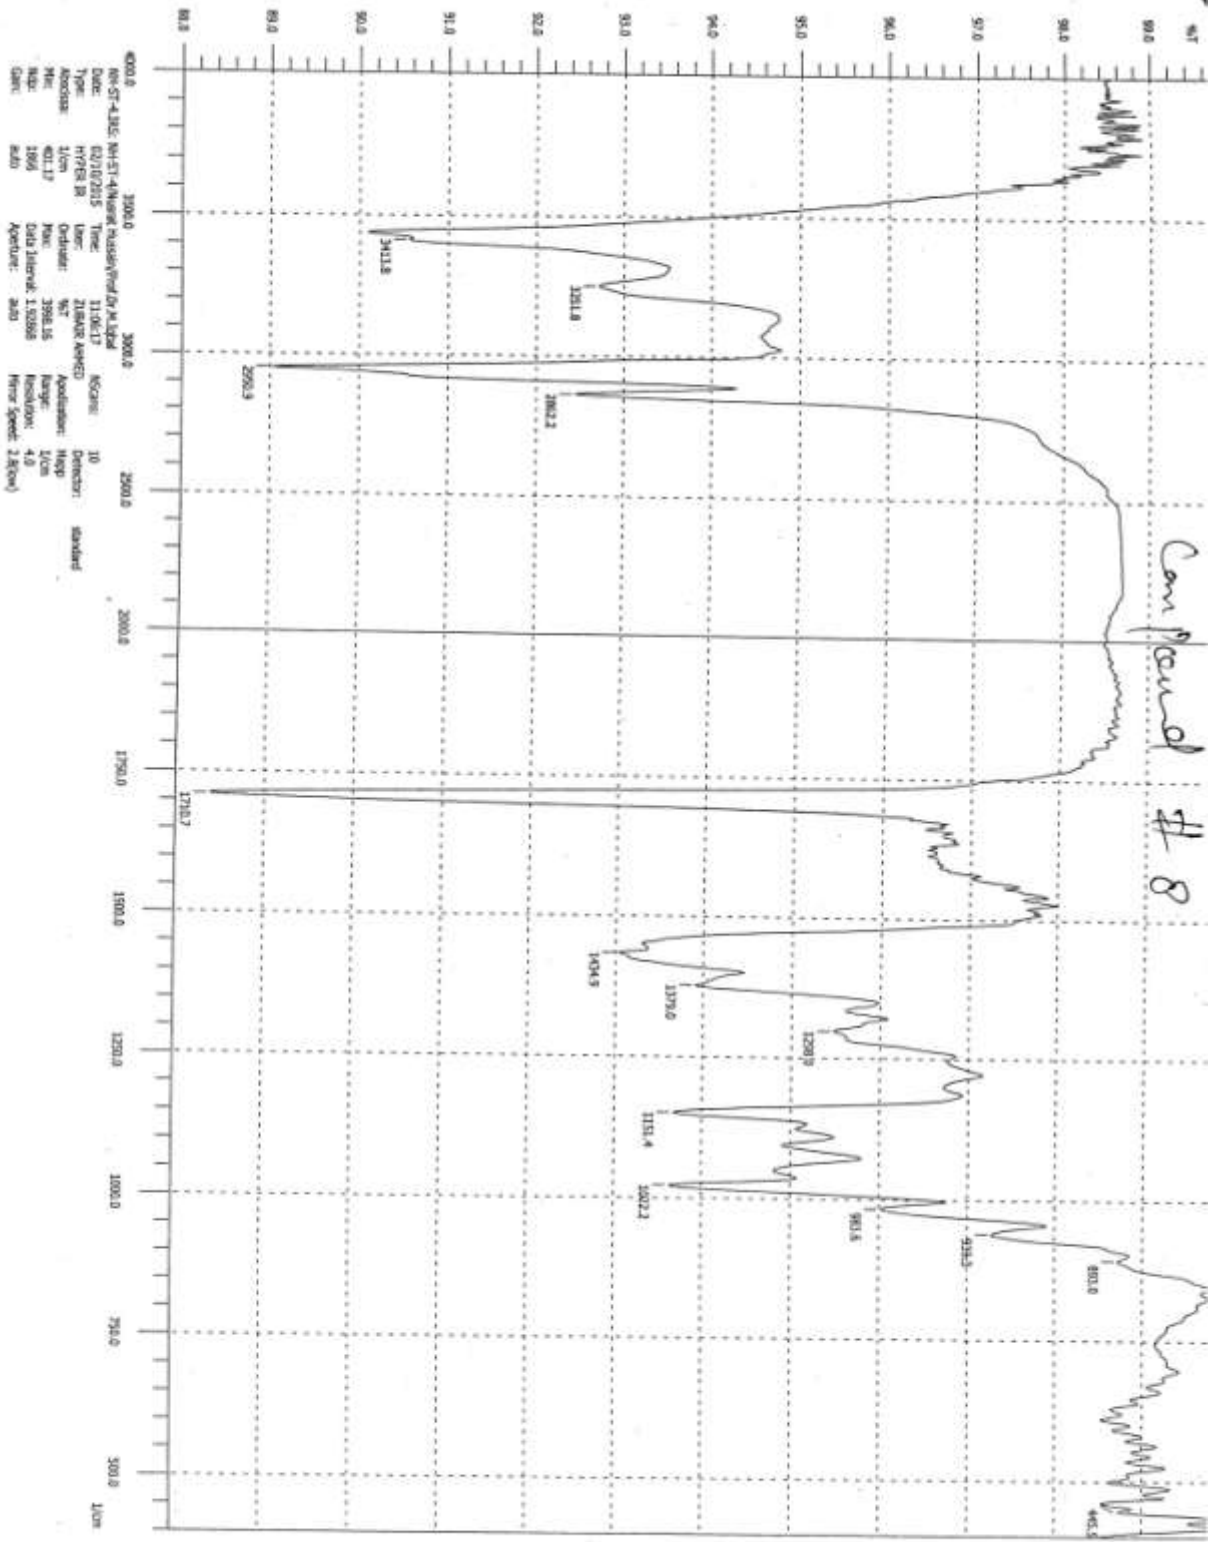

NON-ST-ALBE NH-ST-ANALYST PASSED BY A LISA  
Date: 02/16/2015 Time: 11:06:17 Name: 10  
Type: HYPER IR User: ZILBARI, ABEED  
Absorbance: 1.0cm Ordinate: %T Aperture: 10  
MIR: 401.17 POC: 3998.15 Range: 2cm Detector: standard  
MID: 1999 Data Interval: 1.00288 Resolution: 4.0  
Date: 8/20 Aperture: auto Mirror Speed: 2.50cm

Nusrat / Dr. Iqbal / NH-ST-4  
1H

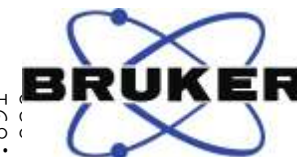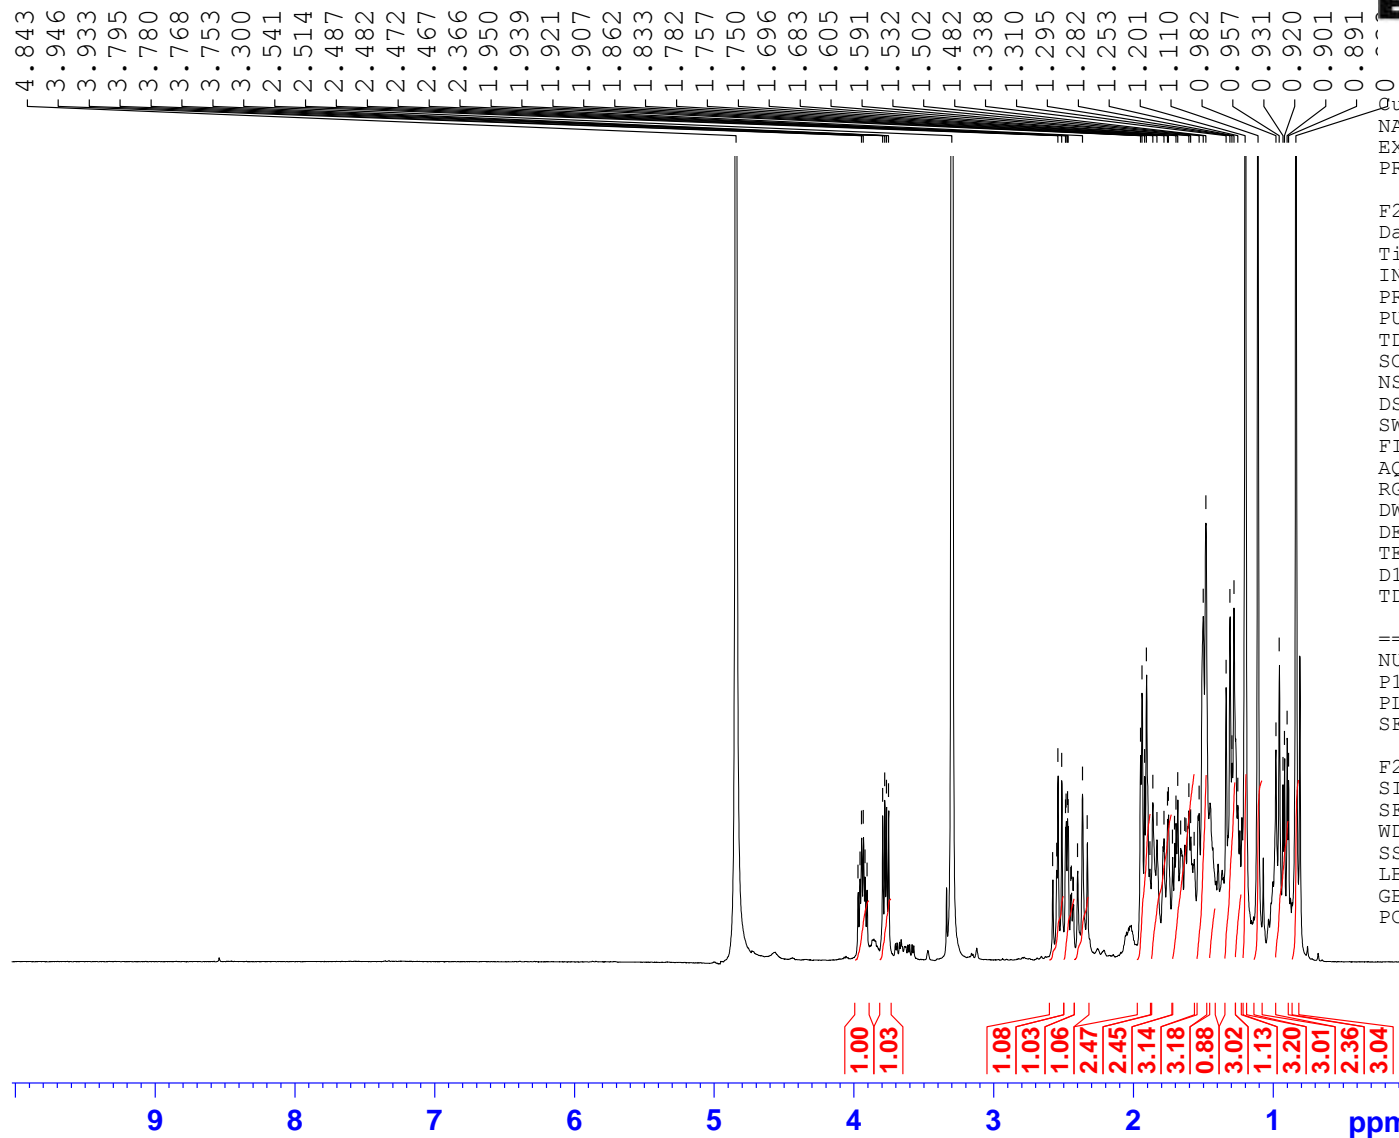

Current Data Parameters  
NAME compound8  
EXPNO 1  
PROCNO 1

F2 - Acquisition Parameters  
Date\_ 20140123  
Time\_ 15.42  
INSTRUM spect  
PROBHD 5 mm SEI 1H-13  
PULPROG zg30  
TD 32768  
SOLVENT MeOD  
NS 32  
DS 0  
SWH 8012.820 Hz  
FIDRES 0.244532 Hz  
AQ 2.0447233 sec  
RG 161.3  
DW 62.400 usec  
DE 6.50 usec  
TE 298.5 K  
D1 1.5000000 sec  
TD0 1

==== CHANNEL f1 =====  
NUC1 1H  
P1 10.80 usec  
PL1 3.00 dB  
SFO1 400.0332002 MHz

F2 - Processing parameters  
SI 16384  
SF 400.0300087 MHz  
WDW EM  
SSB 0  
LB 1.00 Hz  
GB 0  
PC 1.00

Nusrat / Dr. Iqbal / NH-ST-4  
BB

— 211.17

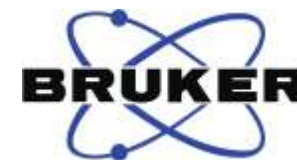

81.88  
77.05  
77.00  
68.06  
61.71  
50.79  
49.63  
49.42  
49.28  
49.21  
49.00  
48.78  
48.57  
48.36  
47.43  
46.63  
45.50  
43.77  
42.88  
39.21

Current Data Parameters  
NAME compound8  
EXPNO 6  
PROCNO 1

F2 - Acquisition Parameters  
Date\_ 20140124  
Time\_ 21.55  
INSTRUM spect  
PROBHD 5 mm SEI 1H-13  
PULPROG zgpg  
TD 32768  
SOLVENT MeOD  
NS 20480  
DS 2  
SWH 24154.590 Hz  
FIDRES 0.737140 Hz  
AQ 0.6782976 sec  
RG 32768  
DW 20.700 usec  
DE 6.50 usec  
TE 298.0 K  
D1 1.5000000 sec  
D11 0.03000000 sec  
TDO 20

==== CHANNEL f1 =====  
NUC1 13C  
P1 12.30 usec  
PL1 -6.00 dB  
SFO1 100.5991916 MHz

==== CHANNEL f2 =====  
CPDPRG[2] waltz16  
NUC2 1H  
PCPD2 75.00 usec  
PL2 3.00 dB  
PL12 20.00 dB  
PL13 22.00 dB  
SFO2 400.0320001 MHz

F2 - Processing parameters  
SI 16384  
SF 100.5874816 MHz  
WDW EM  
SSB 0  
LB 1.00 Hz  
GB 0  
PC 1.00

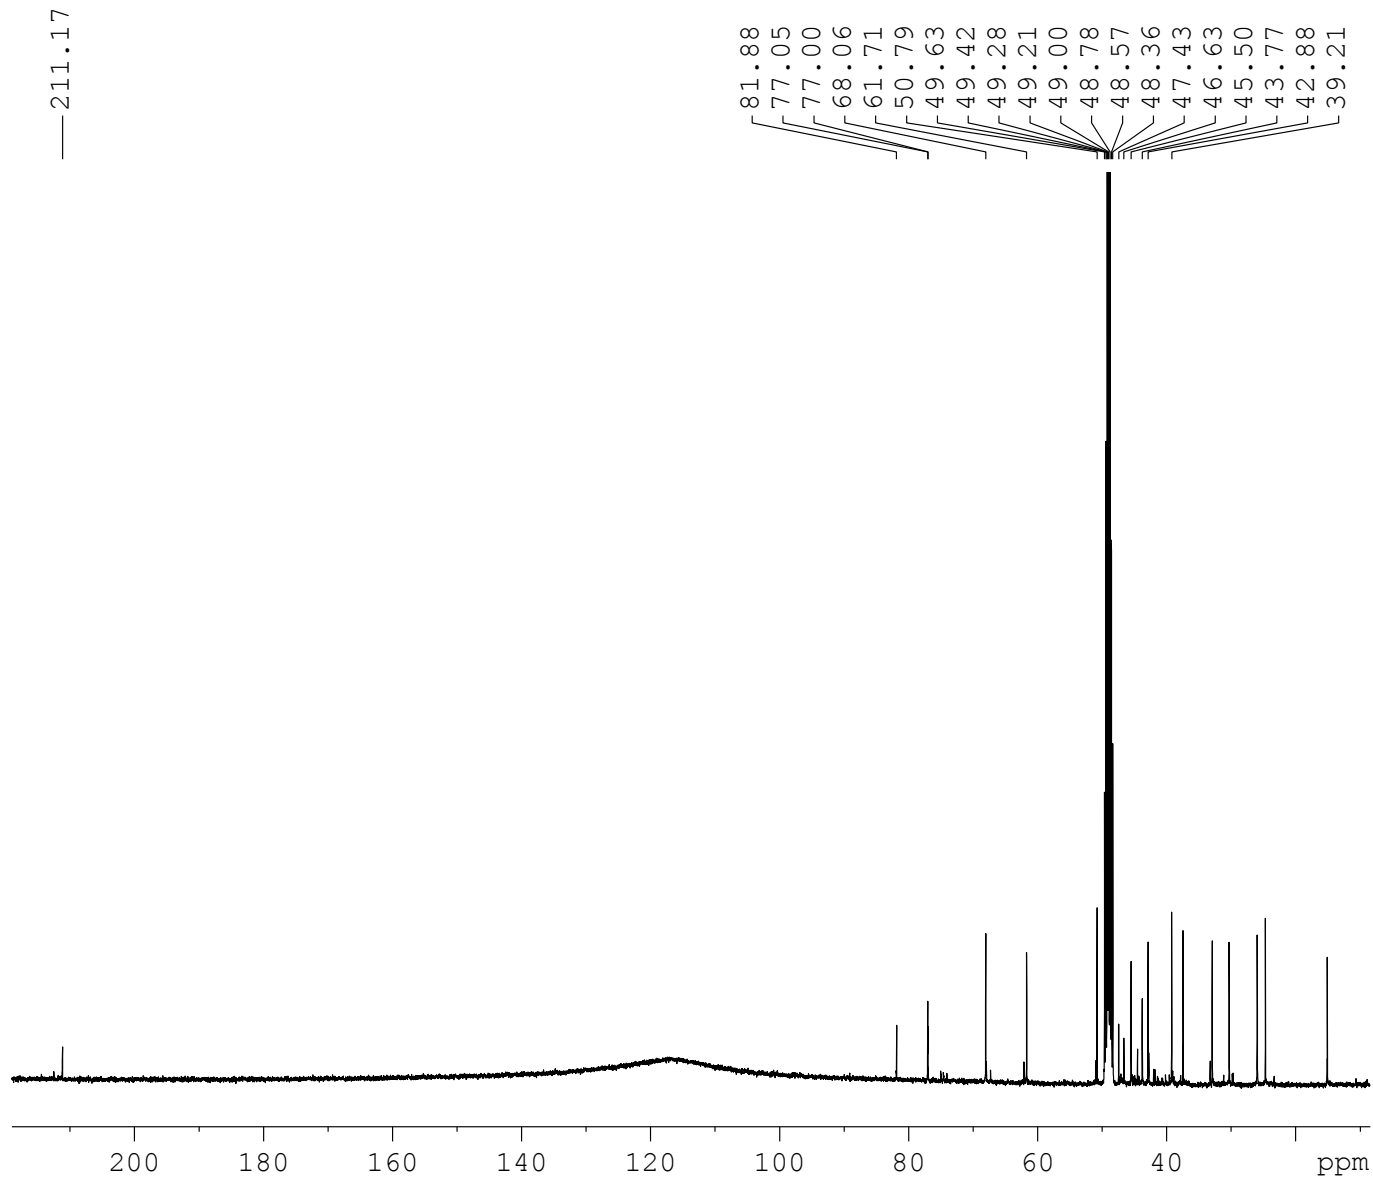

Nusrat / Dr. Iqbal / NH-ST-4  
DEP135#//

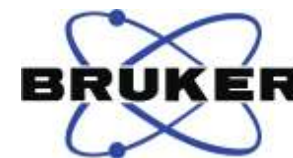

77.0  
77.0  
68.0  
61.0  
50.0  
49.0  
49.0  
49.0  
48.0  
47.0  
45.0  
43.0  
42.0  
39.0  
37.0  
32.0  
30.0  
25.0  
24.0  
15.0

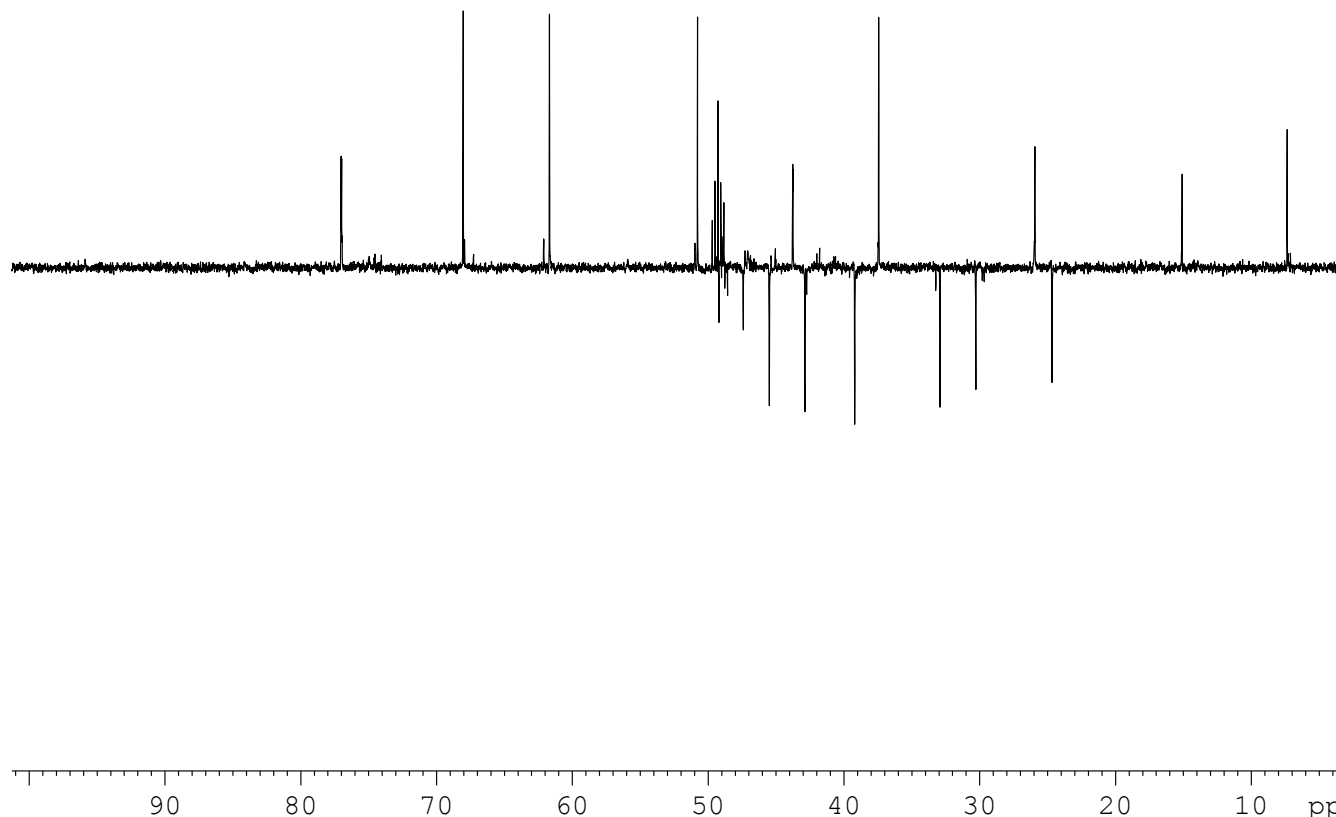

Current Data Parameters  
NAME compound8  
EXPNO 7  
PROCNO 1

F2 - Acquisition Parameters  
Date\_ 20140125  
Time\_ 10.42  
INSTRUM spect  
PROBHD 5 mm SEI 1H-13  
PULPROG dept135  
TD 32768  
SOLVENT MeOD  
NS 10240  
DS 2  
SWH 20080.320 Hz  
FIDRES 0.612803 Hz  
AQ 0.8159232 sec  
RG 16384  
DW 24.900 usec  
DE 6.50 usec  
TE 298.1 K  
CNST2 145.0000000  
D1 1.5000000 sec  
D2 0.00344828 sec  
D12 0.00002000 sec  
TD0 10

==== CHANNEL f1 =====  
NUC1 13C  
P1 12.30 usec  
P2 24.60 usec  
PL1 -6.00 dB  
SFO1 100.5971798 MHz

==== CHANNEL f2 =====  
CPDPRG[2] waltz16  
NUC2 1H  
P3 10.50 usec  
P4 21.00 usec  
PCPD2 75.00 usec  
PL2 3.00 dB  
PL12 20.00 dB  
SFO2 400.0320001 MHz

F2 - Processing parameters  
SI 16384  
SF 100.5874816 MHz  
WDW EM  
SSB 0  
LB 1.00 Hz  
GB 0  
PC 1.20

Nusrat / Dr. Iqbal / NH-ST-4  
DEPT90#

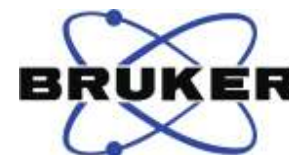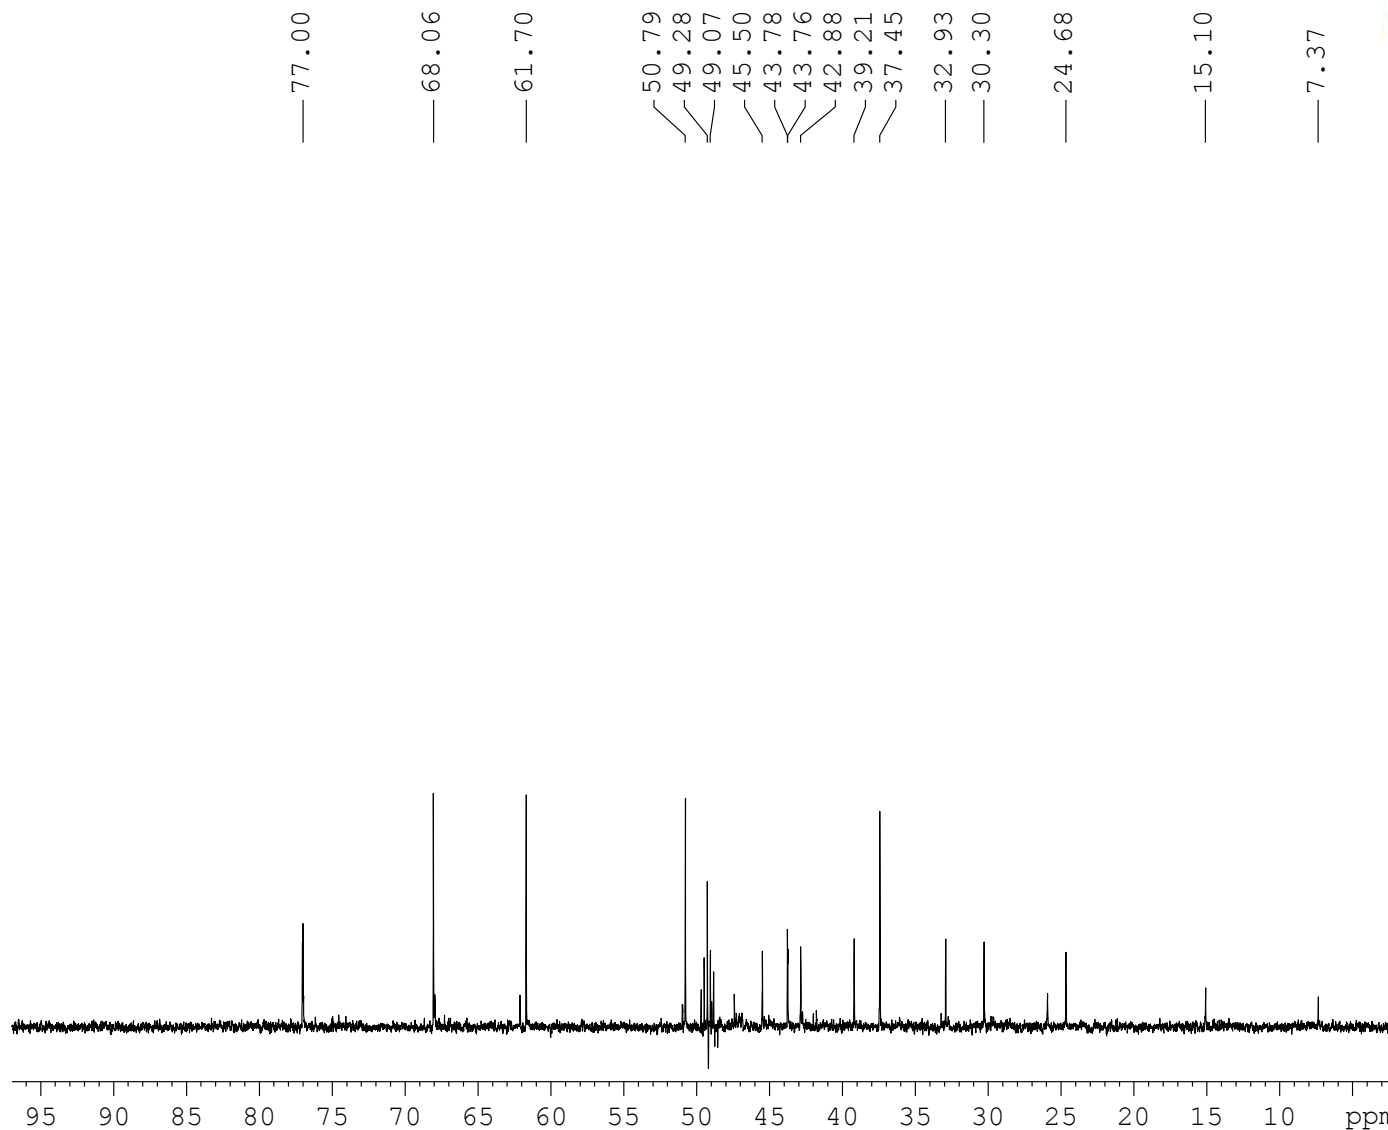

Current Data Parameters  
NAME compound8  
EXPNO 8  
PROCNO 1

F2 - Acquisition Parameters  
Date\_ 20140125  
Time\_ 17.25  
INSTRUM spect  
PROBHD 5 mm SEI 1H-13  
PULPROG dept90  
TD 32768  
SOLVENT MeOD  
NS 5120  
DS 2  
SWH 20080.320 Hz  
FIDRES 0.612803 Hz  
AQ 0.8159232 sec  
RG 16384  
DW 24.900 usec  
DE 6.50 usec  
TE 297.7 K  
CNST2 145.0000000  
D1 1.50000000 sec  
D2 0.00344828 sec  
D12 0.00002000 sec  
TD0 5

==== CHANNEL f1 =====  
NUC1 13C  
P1 12.30 usec  
P2 24.60 usec  
PL1 -6.00 dB  
SFO1 100.5971798 MHz

==== CHANNEL f2 =====  
CPDPRG[2] waltz16  
NUC2 1H  
P3 10.50 usec  
P4 21.00 usec  
PCPD2 75.00 usec  
PL2 3.00 dB  
PL12 20.00 dB  
SFO2 400.0320001 MHz

F2 - Processing parameters  
SI 16384  
SF 100.5874816 MHz  
WDW EM  
SSB 0  
LB 1.00 Hz  
GB 0  
PC 1.20

Nusrat / Dr. Iqbal / NH-ST-4  
HSQC//

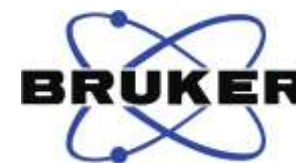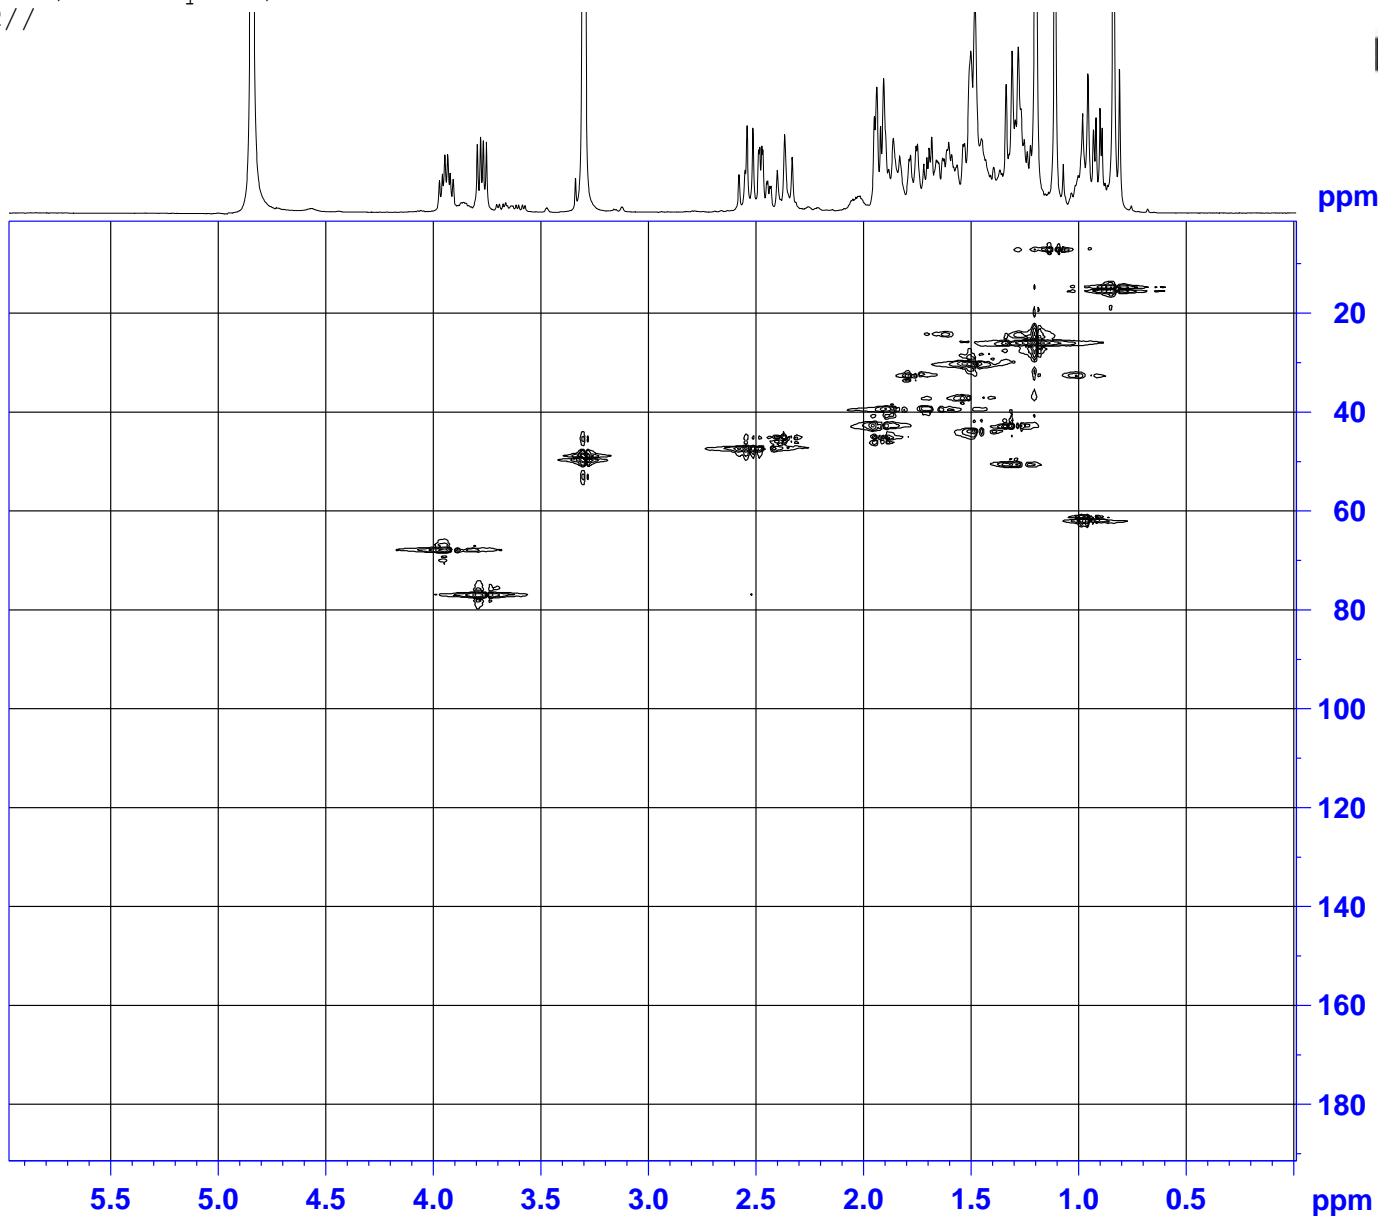

```
Current Data Parameters
NAME      compound8
EXPNO    4
PROCNO   1

F2 - Acquisition Parameters
Date_    20140124
Time     3.01
INSTRUM  spect
PROBHD   5 mm SEI 1H-13
PULPROG  hsqcetgpsi
TD        1024
SOLVENT  MeOD
NS        64
DS        2
SWH       3591.954 Hz
FIDRES    3.507768 Hz
AQ        0.1425408 sec
RG        14596.5
DW        139.200 usec
DE        6.50 usec
TE        298.0 K
CNST2    145.000000
D0        0.00000300 sec
D1        1.50000000 sec
D4        0.00172414 sec
D11       0.03000000 sec
D13       0.00000400 sec
D16       0.00010000 sec
D24       0.00110000 sec
IN0       0.00002615 sec
ZGPTNS

===== CHANNEL f1 =====
NUC1      1H
P1        10.80 usec
P2        21.60 usec
P28       2000.00 usec
PL1       3.00 dB
SFO1      400.0318001 MHz

===== CHANNEL f2 =====
CPDPRG2  garp
NUC2      13C
P3        11.40 usec
P4        22.80 usec
PCPD2    80.00 usec
PL2       -6.00 dB
PL12     17.00 dB
SFO2     100.5971798 MHz

===== GRADIENT CHANNEL =====
GPNAM[1] SINE.100
GPNAM[2] SINE.100
GF21     80.00 %
GF22     20.10 %
P16      1000.00 usec

F1 - Acquisition parameters
TD        256
SFO1     100.5972 MHz
FIDRES    149.323944 Hz
SW        190.000 ppm
FnMODE    Echo-Antiecho

F2 - Processing parameters
SI        1024
SF        400.0300067 MHz
WDW       SINE
SSB       2
LB        0 Hz
GB        0
PC        4.00

F1 - Processing parameters
SI        1024
MC2       echo-antiecho
SF        100.5874816 MHz
WDW       SINE
SSB       2
LB        0 Hz
GB        0
```

Nusrat / Dr. Iqbal / NH-ST-4  
HMBC/

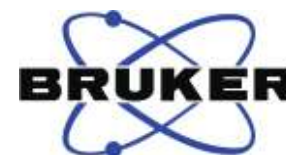

Current Data Parameters  
NAME compound8  
EXPNO 5  
PROCNO 1

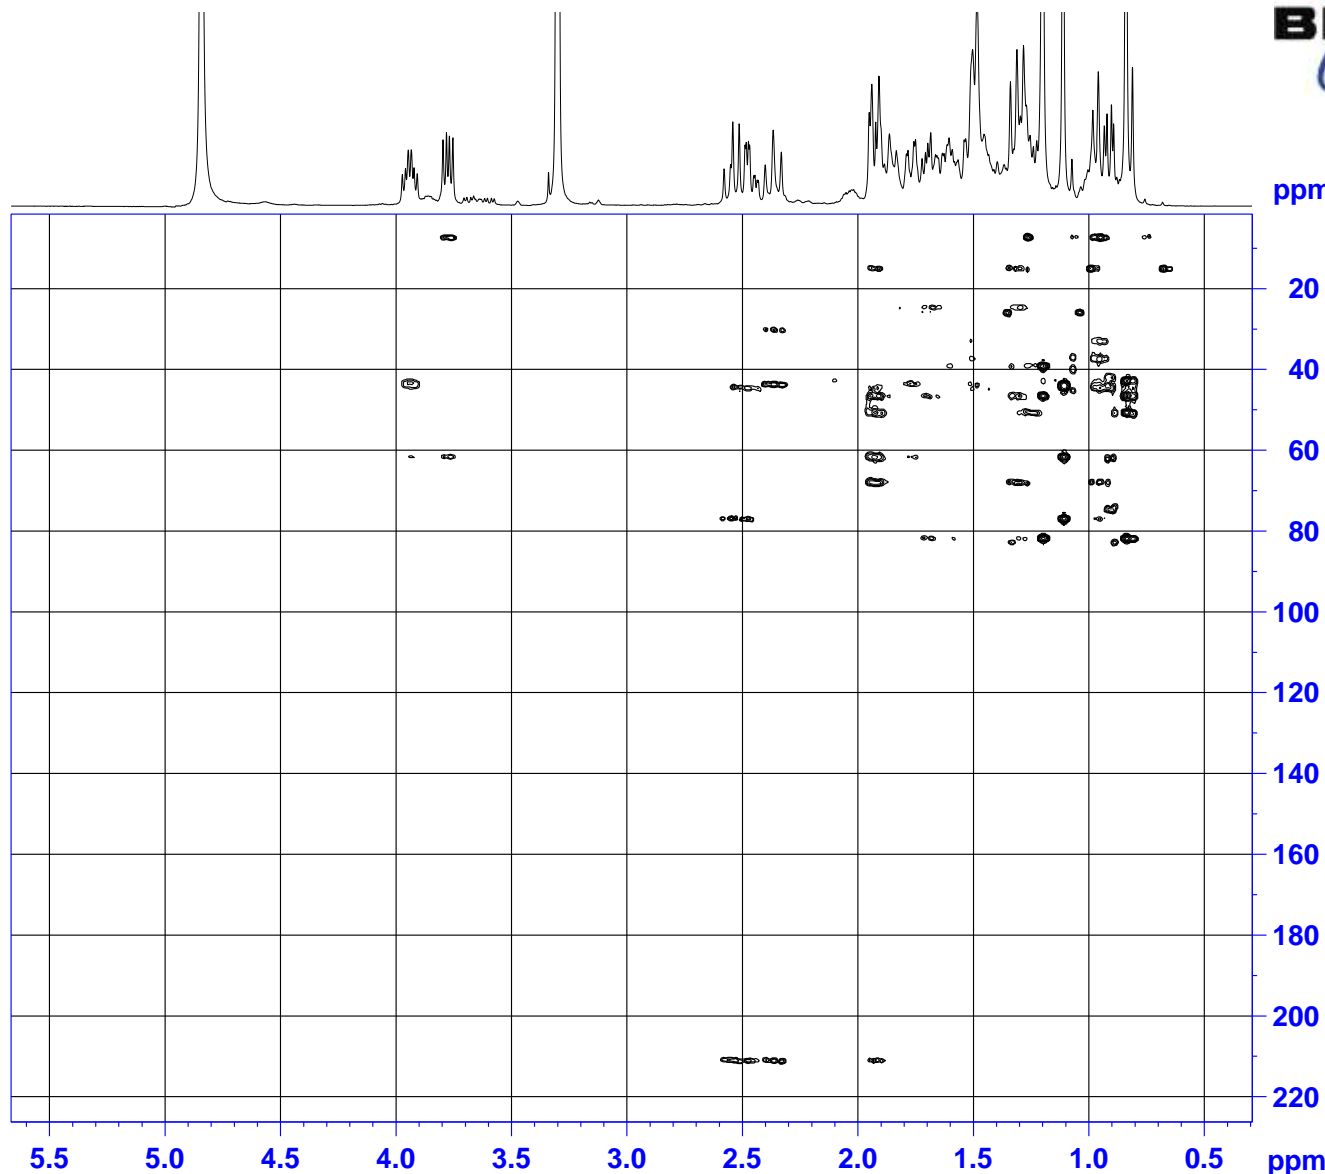

F2 - Acquisition Parameters  
Date\_ 20140124  
Time 10.37  
INSTRUM spect  
PROBHD 5 mm SEI 1H-13  
PULPROG hmbcsglpndqf  
TD 2048  
SOLVENT MeOD  
NS 64  
DS 2  
SWH 3591.954 Hz  
FIDRES 1.753884 Hz  
AQ 0.2850816 sec  
RG 14596.5  
DW 139.200 usec  
DE 6.50 usec  
TE 298.1 K  
CNST2 145.0000000  
CNST13 10.0000000  
D0 0.00000300 sec  
D1 2.00000000 sec  
D2 0.00344828 sec  
D6 0.05000000 sec  
D16 0.00010000 sec  
IN0 0.00002160 sec

==== CHANNEL f1 =====  
NUC1 1H  
P1 10.80 usec  
P2 21.60 usec  
PL1 3.00 dB  
SFO1 400.0318001 MHz

==== CHANNEL f2 =====  
NUC2 13C  
P3 11.40 usec  
PL2 -6.00 dB  
SFO2 100.5991916 MHz

===== GRADIENT CHANNEL =====  
GPNAM[1] SINE.100  
GPNAM[2] SINE.100  
GPNAM[3] SINE.100  
GPZ1 50.00 %  
GPZ2 30.00 %  
GPZ3 40.10 %  
P16 1000.00 usec

F1 - Acquisition parameters  
TD 256  
SFO1 100.5992 MHz  
FIDRES 180.764175 Hz  
SW 230.000 ppm  
FnMODE QF

F2 - Processing parameters  
SI 1024  
SF 400.0300087 MHz  
WDW QSINE  
SSB 0  
LB 0 Hz  
GB 0  
PC 4.00

F1 - Processing parameters  
SI 1024  
MC2 QF  
SF 100.5874816 MHz  
WDW QSINE  
SSB 0  
LB 0 Hz  
GB 0



Nusrat / Dr. Iqbal / NH-ST-4  
COSY

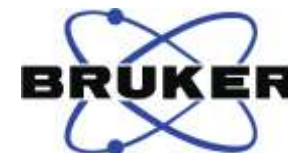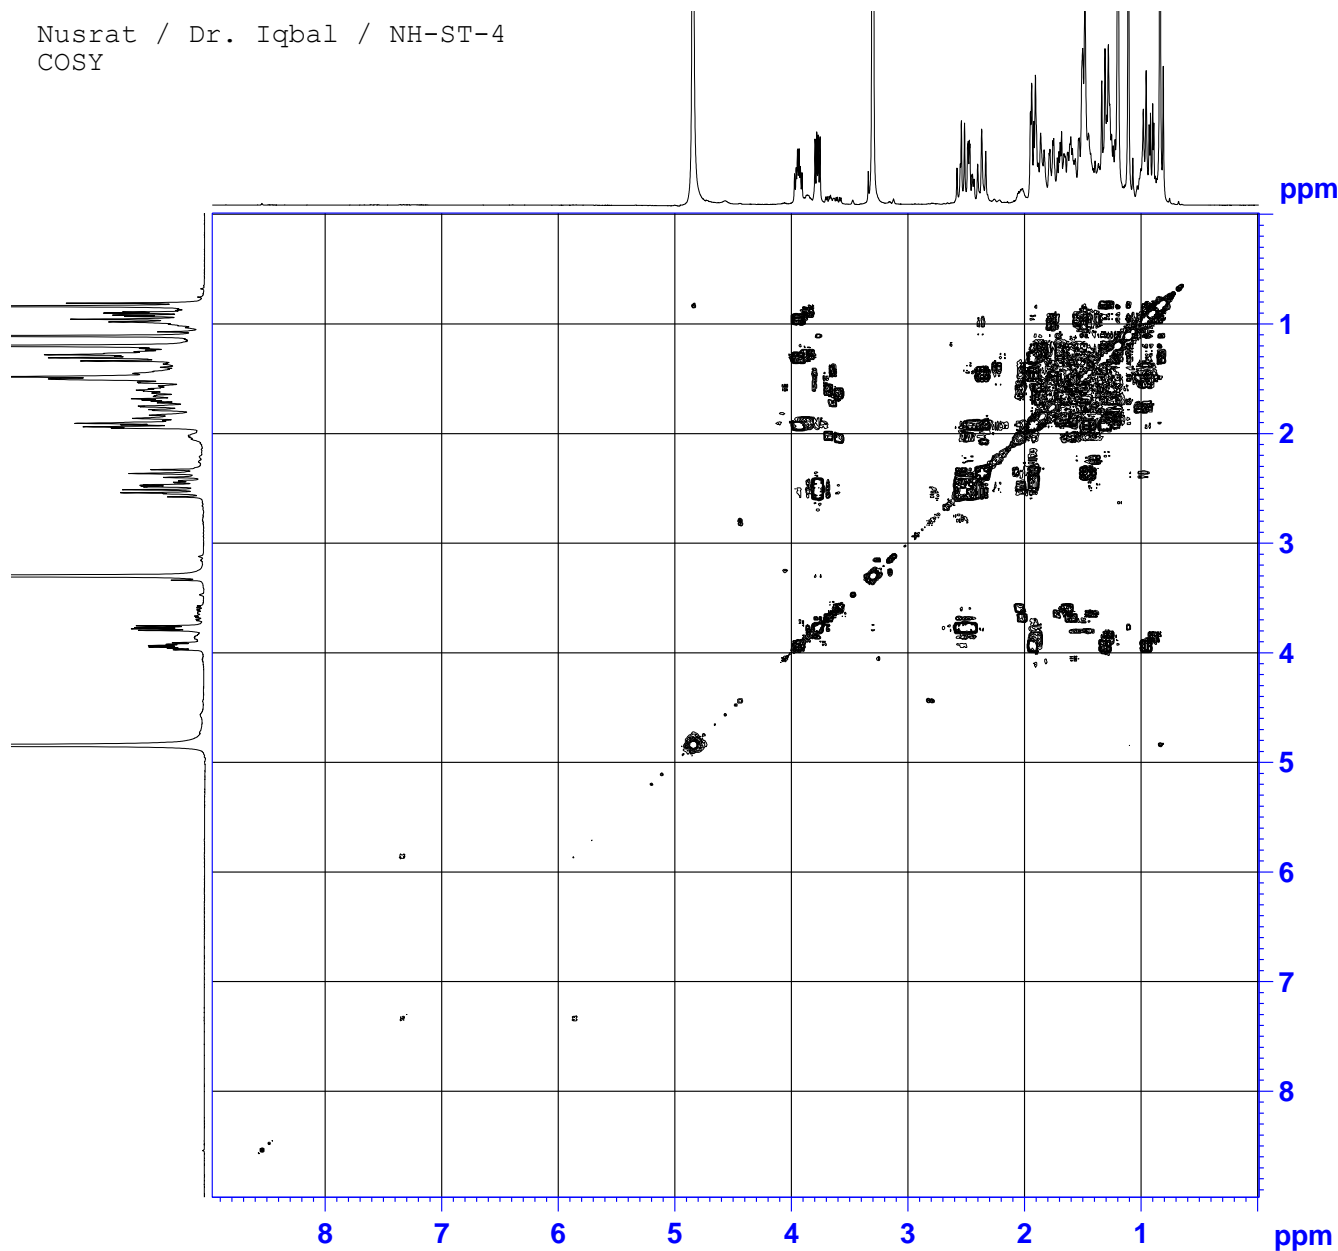

Current Data Parameters  
NAME compound8  
EXPNO 2  
PROCNO 1

F2 - Acquisition Parameters  
Date\_ 20140123  
Time\_ 15.46  
INSTRUM spect  
PROBHD 5 mm SEI 1H-13  
PULPROG cosygpgf  
TD 2048  
SOLVENT MeOD  
NS 32  
DS 8  
SWH 3591.954 Hz  
FIDRES 1.753884 Hz  
AQ 0.2850816 sec  
RG 128  
DW 139.200 usec  
DE 6.50 usec  
TE 298.5 K  
D0 0.00000300 sec  
D1 1.50000000 sec  
D13 0.00000400 sec  
D16 0.00010000 sec  
IN0 0.00027840 sec

==== CHANNEL f1 =====  
NUC1 1H  
P0 10.80 usec  
P1 10.80 usec  
PL1 3.00 dB  
SF01 400.0318001 MHz

===== GRADIENT CHANNEL =====  
GPNAM[1] SINE.100  
GPZ1 10.00 %  
P16 1000.00 usec

F1 - Acquisition parameters  
TD 256  
SF01 400.0318 MHz  
FIDRES 28.062141 Hz  
SW 8.979 ppm  
FnMODE QF

F2 - Processing parameters  
SI 1024  
SF 400.0300087 MHz  
WDW QSINE  
SSB 0  
LB 0 Hz  
GB 0  
PC 4.00

F1 - Processing parameters  
SI 1024  
MC2 QF  
SF 400.0300087 MHz  
WDW QSINE  
SSB 0  
LB 0 Hz  
GB 0

Nusrat / Dr. Iqbal / NH-ST-4  
NOESY/

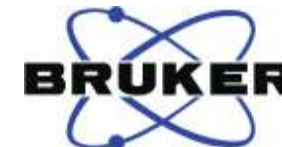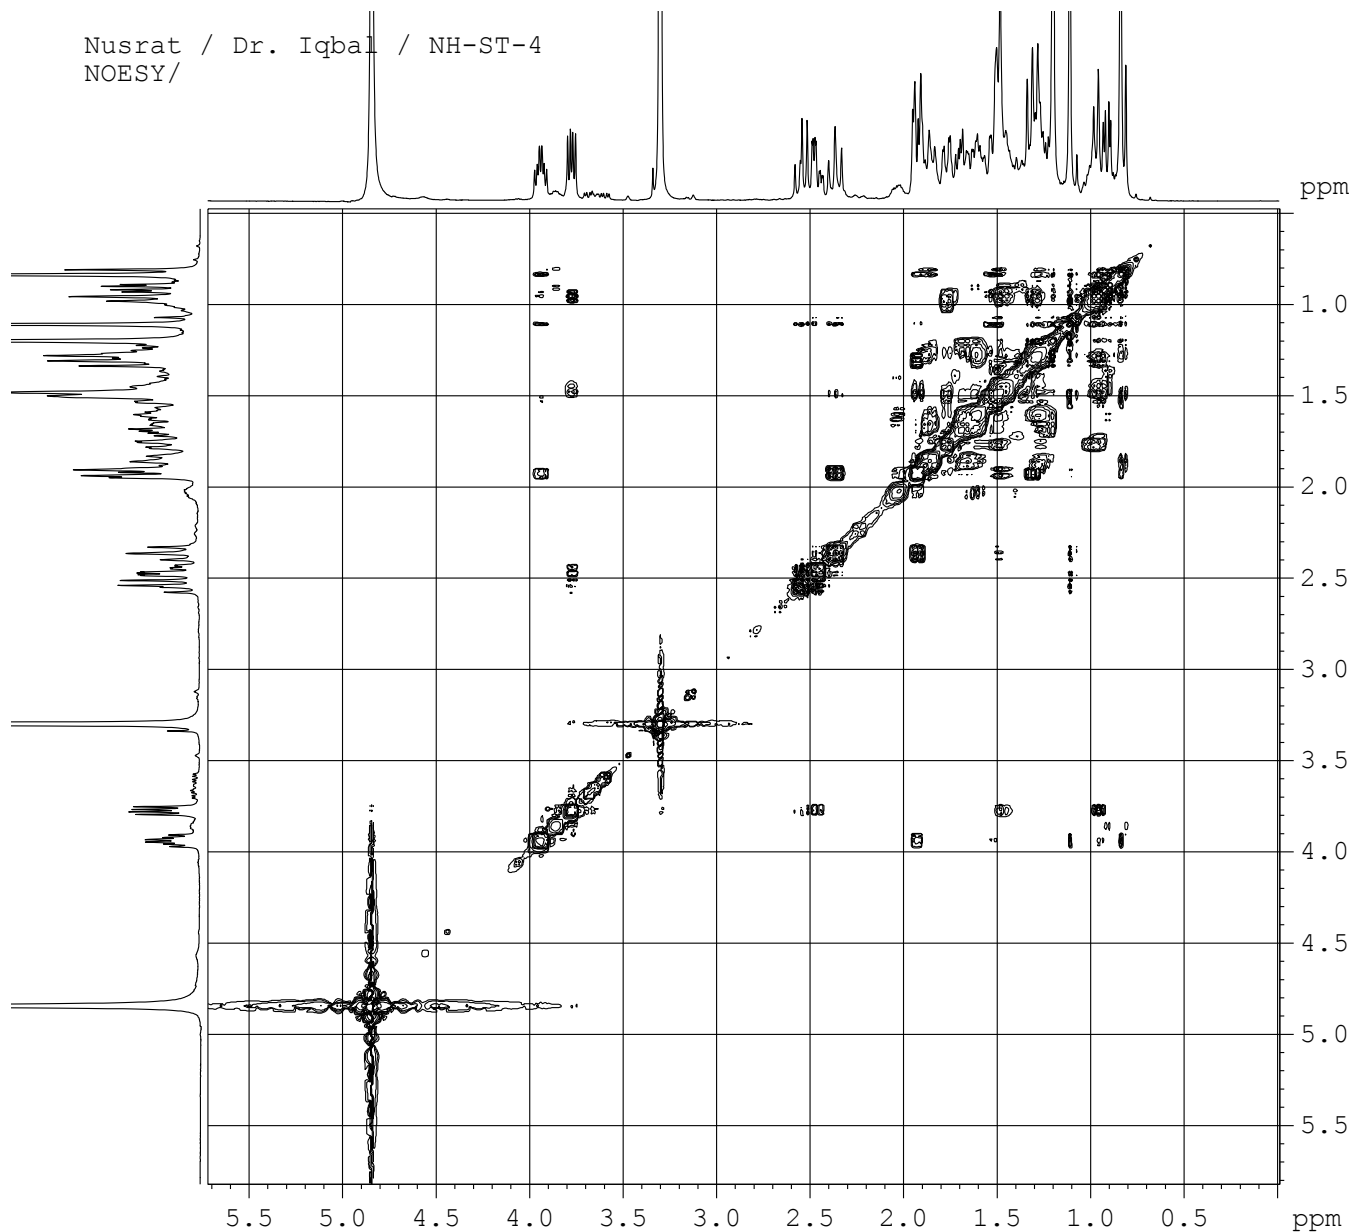

Current Data Parameters  
NAME compound8  
EXPNO 3  
PROCNO 1

F2 - Acquisition Parameters  
Date\_ 20140123  
Time 19.57  
INSTRUM spect  
PROBHD 5 mm SEI 1H-13  
PULPROG noesygpph  
TD 2048  
SOLVENT MeOD  
NS 32  
DS 8  
SWH 3591.954 Hz  
FIDRES 1.753884 Hz  
AQ 0.2850816 sec  
RG 181  
DW 139.200 usec  
DE 6.50 usec  
TE 298.5 K  
D0 0.00012545 sec  
D1 2.00000000 sec  
D8 0.80000001 sec  
D16 0.00010000 sec  
IN0 0.00027840 sec

===== CHANNEL f1 =====  
NUC1 1H  
P1 10.80 usec  
P2 21.60 usec  
PL1 3.00 dB  
SFO1 400.0318001 MHz

===== GRADIENT CHANNEL =====  
GPNAM[1] SINE.100  
GPNAM[2] SINE.100  
GPZ1 40.00 %  
GPZ2 -40.00 %  
P16 1000.00 usec

F1 - Acquisition parameters  
TD 256  
SFO1 400.0318 MHz  
FIDRES 28.062141 Hz  
SW 8.979 ppm  
FnMODE States-TPPI

F2 - Processing parameters  
SI 1024  
SF 400.0300087 MHz  
WDW SINE  
SSB 2  
LB 0 Hz  
GB 0  
PC 4.00

F1 - Processing parameters  
SI 1024  
MC2 States-TPPI  
SF 400.0300087 MHz  
WDW SINE  
SSB 2  
LB 0 Hz  
GB 0
